# Supplementary material for: Multicomponent benzannulation of allylic P-ylides with isocyanates or aldehydes for construction of anilines and biaryls
Source: Royal Society of Chemistry journal article supplement (doi:10.1039/d0cc03461d), 2020-01-01

## Electronic Supplementary Information

# Multicomponent Benzannulation of Allylic P-ylides with Isocyanates or Aldehydes for Construction of Anilines and Biaryls

Kaki Raveendra Babu,<sup>a</sup> Yang Li,<sup>a</sup> Wenbo Xu<sup>\*b</sup> Yuhai Tang,<sup>a</sup> Wenquan Zhang<sup>\*c</sup> and Silong Xu<sup>\*a</sup>

- a. School of Chemistry, Xi'an Key Laboratory of Sustainable Energy Materials Chemistry, and Shaanxi Quantong Joint Research Institute of New Energy Vehicles Power, Xi'an Jiaotong University, Xi'an 710049, P. R. China. E-mail: [silongxu@mail.xjtu.edu.cn](mailto:silongxu@mail.xjtu.edu.cn)
- b. College of Chemistry, Chemical Engineering and Materials Science, Shandong Normal University, Jinan 250014, P. R. China. E-mail: [xuwenbo@sndu.edu.cn](mailto:xuwenbo@sndu.edu.cn)
- c. Institute of Chemical Materials, China Academy of Engineering Physics (CAEP), Mianyang 621900, P. R. China. E-mail: [zhangwq-cn@caep.cn](mailto:zhangwq-cn@caep.cn)

## Table of Contents

|                                                                            |     |
|----------------------------------------------------------------------------|-----|
| 1. General Information .....                                               | S2  |
| 2. Initial Investigation .....                                             | S2  |
| 3. Procedure for The Synthesis of Anilines <b>4</b> .....                  | S3  |
| 4. Analytical Data for Anilines <b>4</b> .....                             | S4  |
| 5. Optimization of Conditions for The Synthesis of Biaryls <b>11</b> ..... | S16 |
| 6. General Procedure for The Synthesis of Biaryls <b>11</b> .....          | S17 |
| 7. Analytical Data for Compounds <b>11</b> .....                           | S18 |
| 8. Control Experiment .....                                                | S21 |
| 9. X-ray Crystallographic Data .....                                       | S22 |
| 10. References .....                                                       | S41 |
| 11. <sup>1</sup> H and <sup>13</sup> C NMR Spectra Copies .....            | S25 |

## 1. General Information

Unless otherwise noted, all reactions were carried out in nitrogen atmosphere under anhydrous conditions using screw cap sealed tube. For all heating reactions, the heating source is the IKA heating Magnetic Stirrers with oil bath containing a temperature sensor. Solvents were purified prior to use according to standard procedures. All other reagents were purchased from commercial sources and used without further purification.  $^1\text{H}$  and  $^{13}\text{C}$  NMR spectra were recorded on a Bruker AV 400 spectrometer operating at 400 MHz for  $^1\text{H}$ , and 100 MHz for  $^{13}\text{C}$ . Chemical shifts are reported in parts per million (ppm) with respect to tetramethylsilane (TMS,  $\delta = 0$ ). Peak multiplicities are reported as follows: s = singlet, d = doublet, t = triplet, q = quartet, dd = doublet of doublets, dt = doublet of triplets, m = multiplet, br = broad signal. High-resolution ESI mass spectra were acquired with a Fourier Transform Ion Cyclotron Resonance Mass Spectrometer. IR data were obtained on a Nicolet iS10 FT-IR spectrometer. Melting points were measured on an SGW® X-4B apparatus and uncorrected. All reactions were monitored by thin layer chromatography (TLC) and visualized by UV irradiation or stained with potassium permanganate. X-ray crystallographic analysis was performed at Bruker D8 Quest. Column chromatography was performed on silica gel (200–300 mesh) using a mixture of petroleum ether (b.p. 60–90 °C)/ethyl acetate as eluent.

## 2. Initial Investigation

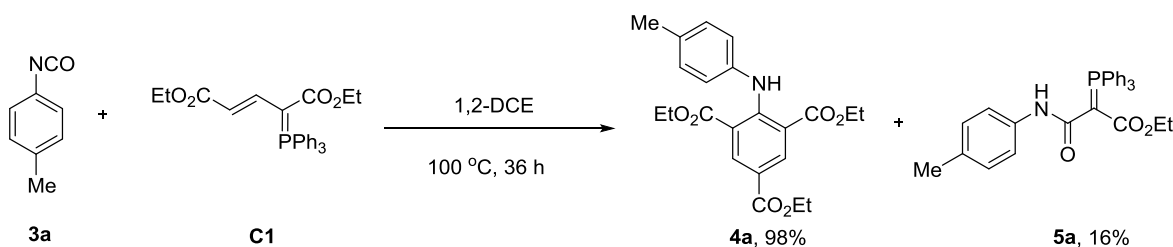

Under  $\text{N}_2$  atmosphere, to a solution of P-ylide **C1**<sup>1</sup> (223 mg, 0.50 mmol) in 1,2-dichloroethane (2.0 mL) was added isocyanate **3a** (66 mg, 0.50 mmol). The reaction mixture was stirred at 100 °C for 36 h. Then, the reaction mixture was cooled to ambient temperature. The solvent was removed by rotary evaporation under reduced pressure

and the residue was purified by column chromatography on silica gel (ethyl acetate/ petroleum ether) to yield compounds **4a** (98 mg, 98%) and **5a**<sup>2</sup> (20 mg, 16%).

### 3. Procedure for The Synthesis of Anilines **4**

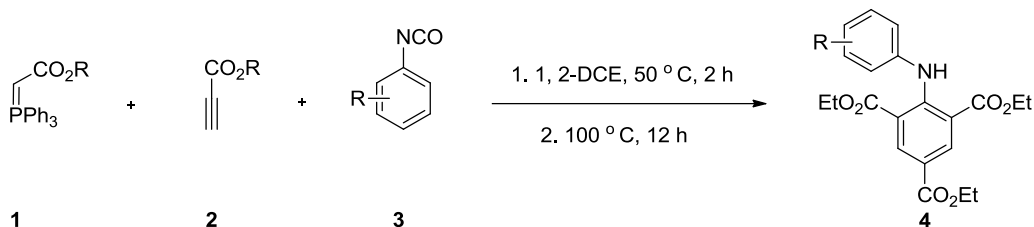

Under N<sub>2</sub> atmosphere, to a solution of P-ylide **1** (0.50 mmol) in 1,2-dichloroethane (2.0 mL) was added alkyl propiolate **2** (0.60 mmol). The mixture was stirred at 50 °C for 2 h. The reaction mixture was cooled to room temperature, then isocyanate **3** (0.50 mmol) was added to the reaction mixture. The mixture was stirred at 100 °C for 12 h. Then, the reaction mixture was cooled to ambient temperature. The solvent was removed by rotary evaporation under reduced pressure and the residue was purified by column chromatography on silica gel (ethyl acetate/ petroleum ether) to yield **4**.

#### A scaled-up synthesis of compound **4a**:

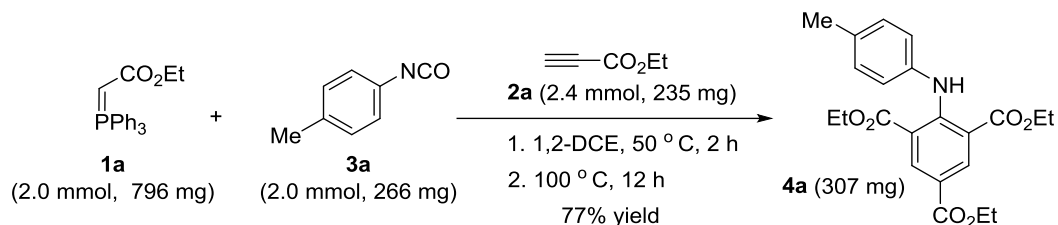

Under N<sub>2</sub> atmosphere and at rt, in a Schlenk tube (50 mL) was added P-ylide **1a** (2.0 mmol, 796 mg) and the solvent 1,2-DCE (10.0 mL), which was followed by the addition of ethyl propiolate (2.4 mmol, 235 mg, 243  $\mu$ L) by syringe in one portion. The mixture was stirred at 50 °C for 2 hours, at that time P-ylide **1a** was completely consumed as monitored by TLC. The reaction was cooled down to room temperature, and *p*-tolyl isocyanate (2.0 mmol, 266 mg) was added in one portion. The mixture was then stirred at 100 °C for 12 hours. The solvent was removed by rotary evaporation and the residue was purified by silica gel column chromatography (gradient elution: petroleum

ether/ethyl acetate = 5/1 to 1/1) to afford the product **4a** as a pale yellow solid in 307 mg, 77% yield.

#### 4. Analytical Data for Anilines **4**

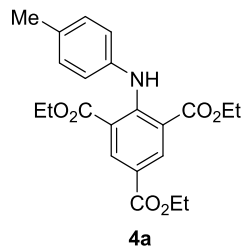

**4a:** Following the general procedure, the reaction of ethyl 2-(triphenylphosphoranylidene)acetate **1a** (174 mg, 0.50 mmol), ethyl propiolate **2a** (59 mg, 0.60 mmol) and 1-isocyanato-4-methylbenzene **3a** (66 mg, 0.50 mmol) provided **4a** as pale yellow solid, in 85 mg, 85% yield, m. p: 62–64 °C;  $^1\text{H}$  NMR (400 MHz,  $\text{CDCl}_3$ )  $\delta$  10.26 (br s, 1H), 8.55 (s, 2H), 7.07 (d,  $J = 8.3$  Hz, 2H), 6.94 (d,  $J = 8.3$  Hz, 2H), 4.36 (q,  $J = 7.1$  Hz, 2H), 4.01 (q,  $J = 7.1$  Hz, 4H), 2.28 (s, 3H), 1.38 (t,  $J = 7.1$  Hz, 3H), 1.22 (t,  $J = 7.1$  Hz, 6H).  $^{13}\text{C}$  NMR (100 MHz,  $\text{CDCl}_3$ )  $\delta$  167.4, 165.2, 149.1, 139.5, 137.0, 133.7, 129.8, 120.1, 118.8, 117.8, 61.3, 60.9, 20.7, 14.3, 13.9. IR  $\nu_{\text{max}}$  (neat): 3331, 2980, 2927, 1714, 1686, 1599, 1515, 1445, 1406, 1368, 1312, 1222, 1182, 1139, 1096, 1065, 1023, 862, 814, 768, 744, 719, 687, 637, 508  $\text{cm}^{-1}$ . HRMS (ESI)  $m/z$ :  $[\text{M}+\text{H}]^+$  Calcd for  $\text{C}_{22}\text{H}_{26}\text{NO}_6$  400.1755; Found 400.1754.

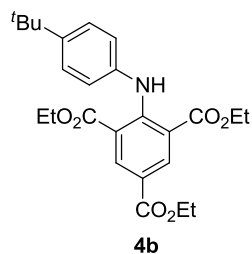

**4b:** Following the general procedure, the reaction of ethyl 2-(triphenylphosphoranylidene)acetate **1a** (174 mg, 0.50 mmol), ethyl propiolate **2a** (59 mg, 0.60 mmol) and 1-(tert-butyl)-4-isocyanatobenzene **3b** (88 mg, 0.50 mmol) provided **4b** as pale yellow solid, in 89 mg, 80% yield, m. p: 94–96 °C;  $^1\text{H}$  NMR (400 MHz,  $\text{CDCl}_3$ )  $\delta$  10.27 (br s, 1H), 8.56 (s, 2H), 7.30 (d,  $J = 8.6$  Hz, 2H), 6.99 (d,  $J = 8.6$  Hz, 2H), 4.38

(q,  $J = 7.1$  Hz, 2H), 4.01 (q,  $J = 7.1$  Hz, 4H), 1.39 (t,  $J = 7.1$  Hz, 3H), 1.29 (s, 9H), 1.20 (t,  $J = 7.1$  Hz, 6H).  $^{13}\text{C}$  NMR (100 MHz,  $\text{CDCl}_3$ )  $\delta$  167.4, 165.3, 149.1, 147.1, 139.5, 137.0, 126.1, 119.9, 118.9, 117.9, 61.3, 60.9, 34.3, 31.3, 14.4, 14.0. IR  $\nu_{\text{max}}$  (neat): 3237, 2958, 2923, 2867, 1713, 1682, 1598, 1518, 1465, 1366, 1268, 1235, 1220, 1174, 1142, 1067, 1025, 934, 882, 867, 836, 796, 763, 717, 686, 658, 553  $\text{cm}^{-1}$ . HRMS (ESI)  $m/z$ :  $[\text{M}+\text{H}]^+$  Calcd for  $\text{C}_{25}\text{H}_{32}\text{NO}_6$  442.2225; Found 442.2220.

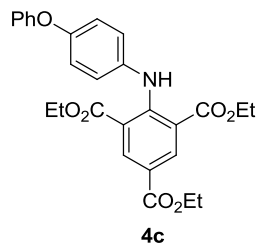

**4c:** Following the general procedure, the reaction of ethyl 2-(triphenylphosphoranylidene)acetate **1a** (174 mg, 0.50 mmol), ethyl propiolate **2a** (59 mg, 0.60 mmol) and 1-isocyanato-4-phenoxybenzene **3c** (106 mg, 0.50 mmol) provided **4c** as pale yellow solid, in 117 mg, 98% yield, m. p: 64–66 °C;  $^1\text{H}$  NMR (400 MHz,  $\text{CDCl}_3$ )  $\delta$  10.29 (br s, 1H), 8.57 (s, 2H), 7.34–7.30 (m, 2H), 7.10–7.04 (m, 3H), 6.98–6.94 (m, 4H), 4.38 (q,  $J = 7.1$  Hz, 2H), 4.10 (q,  $J = 7.1$  Hz, 4H), 1.40 (t,  $J = 7.1$  Hz, 3H), 1.27 (t,  $J = 7.1$  Hz, 6H).  $^{13}\text{C}$  NMR (100 MHz,  $\text{CDCl}_3$ )  $\delta$  167.3, 165.2, 157.5, 153.4, 149.2, 137.8, 137.0, 129.7, 123.0, 121.7, 120.1, 119.1, 118.2, 117.8, 61.4, 60.9, 14.3, 14.0. IR  $\nu_{\text{max}}$  (neat): 3320, 2927, 2929, 1710, 1684, 1589, 1504, 1486, 1409, 1368, 1308, 1216, 1181, 1095, 1065, 1024, 935, 869, 849, 796, 763, 749, 690, 646, 555, 510  $\text{cm}^{-1}$ . HRMS (ESI)  $m/z$ :  $[\text{M}+\text{H}]^+$  Calcd for  $\text{C}_{27}\text{H}_{28}\text{NO}_7$  478.1861; Found 478.1855.

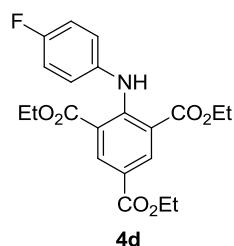

**4d:** Following the general procedure, the reaction of ethyl 2-(triphenylphosphoranylidene)acetate **1a** (174 mg, 0.50 mmol), ethyl propiolate **2a** (59 mg, 0.60 mmol) and 1-fluoro-4-isocyanatobenzene **3d** (68 mg, 0.50 mmol) provided **4d**

as pale yellow solid, in 90 mg, 89% yield, m. p: 56–58 °C;  $^1\text{H}$  NMR (400 MHz,  $\text{CDCl}_3$ )  $\delta$  10.26 (br s, 1H), 8.57 (s, 2H), 7.06–6.96 (m, 4H), 4.39 (q,  $J = 7.1$  Hz, 2H), 4.07 (q,  $J = 7.1$  Hz, 4H), 1.40 (t,  $J = 7.1$  Hz, 3H), 1.26 (t,  $J = 7.1$  Hz, 6H).  $^{13}\text{C}$  NMR (100 MHz,  $\text{CDCl}_3$ )  $\delta$  167.3, 165.1, 159.3 (d,  $J_{\text{F-C}} = 242.0$  Hz), 149.1, 138.3 (d,  $J_{\text{F-C}} = 3.1$  Hz), 137.0, 121.9 (d,  $J_{\text{F-C}} = 8.2$  Hz), 119.3, 117.8, 116.0 (d,  $J_{\text{F-C}} = 23.1$  Hz), 61.4, 61.0, 14.3, 14.0. IR  $\nu_{\text{max}}$  (neat): 3244, 2981, 2935, 1711, 1672, 1589, 1506, 1488, 1444, 1409, 1367, 1309, 1218, 1182, 1141, 1095, 1066, 1025, 950, 854, 821, 798, 757, 723, 686, 629, 556, 513, 485, 453  $\text{cm}^{-1}$ . HRMS (ESI)  $m/z$ :  $[\text{M}+\text{H}]^+$  Calcd for  $\text{C}_{21}\text{H}_{23}\text{FNO}_6$  404.1504; Found 404.1502.

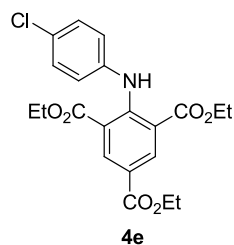

**4e:** Following the general procedure, the reaction of ethyl 2-(triphenylphosphoranylidene)acetate **1a** (174 mg, 0.50 mmol), ethyl propiolate **2a** (59 mg, 0.60 mmol) and 1-chloro-4-isocyanatobenzene **3e** (77 mg, 0.50 mmol) provided **4e** as pale yellow solid, in 94 mg, 89% yield, m. p: 84–86 °C;  $^1\text{H}$  NMR (400 MHz,  $\text{CDCl}_3$ )  $\delta$  10.27 (br s, 1H), 8.59 (s, 2H), 7.26–7.23 (m, 2H), 7.00–6.98 (m, 2H), 4.39 (q,  $J = 7.1$  Hz, 2H), 4.08 (q,  $J = 7.1$  Hz, 4H), 1.40 (t,  $J = 7.1$  Hz, 3H), 1.26 (t,  $J = 7.1$  Hz, 6H).  $^{13}\text{C}$  NMR (100 MHz,  $\text{CDCl}_3$ )  $\delta$  167.2, 165.1, 148.4, 140.9, 137.0, 129.3, 128.9, 128.8, 121.0, 119.9, 118.3, 61.5, 61.0, 14.3, 14.0. IR  $\nu_{\text{max}}$  (neat): 3224, 2975, 2922, 2851, 1898, 1708, 1684, 1588, 1513, 1491, 1443, 1397, 1367, 1305, 1222, 1181, 1142, 1089, 1023, 934, 881, 852, 829, 809, 797, 762, 724, 679, 628, 591, 523, 504, 474, 436, 414  $\text{cm}^{-1}$ . HRMS (ESI)  $m/z$ :  $[\text{M}+\text{H}]^+$  Calcd for  $\text{C}_{21}\text{H}_{23}\text{ClNO}_6$  420.1209; Found 420.1205.

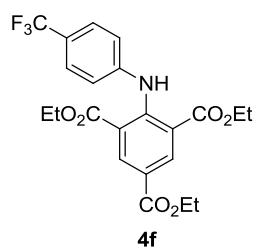

**4f:** Following the general procedure, the reaction of ethyl 2-(triphenylphosphoranylidene)acetate **1a** (174 mg, 0.50 mmol), ethyl propiolate **2a** (59 mg, 0.60 mmol) and 1-isocyanato-4-(trifluoromethyl)benzene **3f** (93 mg, 0.50 mmol) provided **4f** as pale yellow solid, in 76 mg, 67% yield, m. p: 62–64 °C;  $^1\text{H}$  NMR (400 MHz,  $\text{CDCl}_3$ )  $\delta$  10.37 (brs, 1H), 8.64 (s, 2H), 7.52 (d,  $J$  = 8.5 Hz, 2H), 7.11 (d,  $J$  = 8.5 Hz, 2H), 4.41 (q,  $J$  = 7.1 Hz, 2H), 4.09 (q,  $J$  = 7.1 Hz, 4H), 1.41 (t,  $J$  = 7.1 Hz, 3H), 1.23 (t,  $J$  = 7.1 Hz, 6H).  $^{13}\text{C}$  NMR (100 MHz,  $\text{CDCl}_3$ )  $\delta$  167.0, 164.9, 147.5, 145.6, 137.0, 125.9 (q,  $J_{\text{F-C}}$  = 62.1 Hz), 126.6 (q,  $J_{\text{F-C}}$  = 11.0 Hz), 124.6 (q,  $J_{\text{F-C}}$  = 270.3 Hz), 120.9, 119.1, 118.7, 117.9, 61.6, 61.2, 14.3, 13.9. IR  $\nu_{\text{max}}$  (neat): 3255, 2989, 2908, 1741, 1708, 1682, 1598, 1523, 1480, 1448, 1422, 1393, 1368, 1305, 1233, 1182, 1157, 1105, 1066, 1024, 945, 934, 849, 814, 798, 767, 756, 730, 715, 694, 665, 589, 548, 508, 447, 418  $\text{cm}^{-1}$ . HRMS (ESI)  $m/z$ :  $[\text{M}+\text{H}]^+$  Calcd for  $\text{C}_{22}\text{H}_{23}\text{F}_3\text{NO}_6$  454.1472; Found 454.1464.

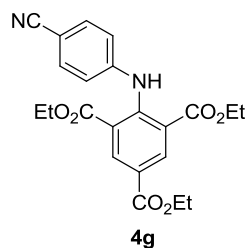

**4g:** Following the general procedure, the reaction of ethyl 2-(triphenylphosphoranylidene)acetate **1a** (174 mg, 0.50 mmol), ethyl propiolate **2a** (59 mg, 0.60 mmol) and 4-isocyanatobenzonitrile **3g** (72 mg, 0.50 mmol) provided **4g** as pale yellow solid, in 50 mg, 49% yield, m. p: 97–99 °C;  $^1\text{H}$  NMR (400 MHz,  $\text{CDCl}_3$ )  $\delta$  10.38 (br s, 1H), 8.66 (s, 2H), 7.55 (d,  $J$  = 8.7 Hz, 2H), 7.06 (d,  $J$  = 8.7 Hz, 2H), 4.41 (q,  $J$  = 7.1 Hz, 2H), 4.13 (q,  $J$  = 7.1 Hz, 4H), 1.42 (t,  $J$  = 7.1 Hz, 3H), 1.26 (t,  $J$  = 7.1 Hz, 6H).  $^{13}\text{C}$  NMR (100 MHz,  $\text{CDCl}_3$ )  $\delta$  166.8, 164.8, 146.6, 146.5, 137.0, 133.5, 121.9, 119.8, 118.9, 118.3, 105.6, 61.8, 61.3, 14.3, 14.0. IR  $\nu_{\text{max}}$  (neat): 3234, 2983, 2920, 2850, 2221, 1710, 1679, 1593, 1512, 1470, 1444, 1421, 1390, 1367, 1302, 1230, 1176, 1139, 1105, 1024, 935, 856, 814, 797, 761, 744, 715, 688, 597, 561, 545, 507, 460  $\text{cm}^{-1}$ . HRMS (ESI)  $m/z$ :  $[\text{M}+\text{H}]^+$  Calcd for  $\text{C}_{22}\text{H}_{23}\text{N}_2\text{O}_6$  411.1551; Found 411.1544.

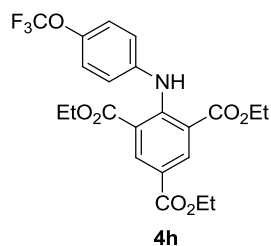

**4h:** Following the general procedure, the reaction of ethyl 2-(triphenylphosphoranylidene)acetate **1a** (174 mg, 0.50 mmol), ethyl propiolate **2a** (59 mg, 0.60 mmol) and 1-isocyanato-4-(trifluoromethoxy)benzene **3h** (101 mg, 0.50 mmol) provided **4h** as pale yellow solid, in 94 mg, 80% yield, m. p: 36–38 °C;  $^1\text{H}$  NMR (400 MHz,  $\text{CDCl}_3$ )  $\delta$  10.23 (br s, 1H), 8.52 (s, 2H), 7.06 (d,  $J = 8.6$  Hz, 2H), 6.99 (d,  $J = 8.6$  Hz, 2H), 4.31 (q,  $J = 7.1$  Hz, 2H), 4.00 (q,  $J = 7.1$  Hz, 4H), 1.33 (t,  $J = 7.1$  Hz, 3H), 1.16 (t,  $J = 7.1$  Hz, 6H).  $^{13}\text{C}$  NMR (100 MHz,  $\text{CDCl}_3$ )  $\delta$  167.1, 165.0, 148.5, 144.9 (q,  $J_{\text{F-C}} = 5.0$  Hz), 141.2, 137.0, 122.5 (q,  $J_{\text{F-C}} = 255.0$  Hz), 120.9, 120.0, 119.1, 118.3, 61.5, 61.1, 14.3, 13.9. IR  $\nu_{\text{max}}$  (neat): 3242, 2987, 1702, 1604, 1534, 1510, 1448, 1394, 1366, 1312, 1221, 1200, 1153, 1112, 1066, 1025, 939, 920, 856, 796, 760, 719, 695, 643, 584, 490, 431  $\text{cm}^{-1}$ . HRMS (ESI)  $m/z$ :  $[\text{M}+\text{H}]^+$  Calcd for  $\text{C}_{22}\text{H}_{26}\text{F}_3\text{NO}_7$  470.1422; Found 470.1417.

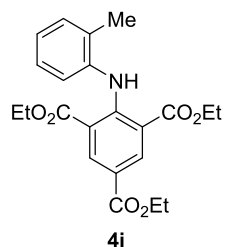

**4i:** Following the general procedure, the reaction of ethyl 2-(triphenylphosphoranylidene)acetate **1a** (174 mg, 0.50 mmol), ethyl propiolate **2a** (59 mg, 0.60 mmol) and 1-isocyanato-2-methylbenzene **3i** (66 mg, 0.50 mmol) provided **4i** as pale yellow solid, in 88 mg, 88% yield, m. p: 98–100 °C;  $^1\text{H}$  NMR (400 MHz,  $\text{CDCl}_3$ )  $\delta$  10.11 (br s, 1H), 8.57 (s, 2H), 7.24–7.22 (m, 1H), 7.09–7.06 (m, 1H), 7.02–6.96 (m, 2H), 4.38 (q,  $J = 7.1$  Hz, 2H), 4.00 (q,  $J = 7.1$  Hz, 4H), 2.39 (s, 3H), 1.40 (t,  $J = 7.1$  Hz, 3H), 1.22 (t,  $J = 7.1$  Hz, 6H).  $^{13}\text{C}$  NMR (100 MHz,  $\text{CDCl}_3$ )  $\delta$  167.4, 165.3, 149.5, 140.7, 136.9, 130.9, 130.7, 126.5, 124.4, 118.8, 118.6, 117.7, 61.2, 60.9, 18.1, 14.3, 13.9. IR  $\nu_{\text{max}}$  (neat): 3241, 2979, 2917, 2849, 1707, 1682, 1611, 1592, 1513, 1460, 1411, 1389, 1366,

1310, 1225, 1178, 1104, 1029, 938, 887, 866, 797, 755, 715, 690, 657, 541, 513, 498, 451  $\text{cm}^{-1}$ . HRMS (ESI)  $m/z$ :  $[M+H]^+$  Calcd for  $\text{C}_{22}\text{H}_{26}\text{NO}_6$  400.1755; Found 400.1749.

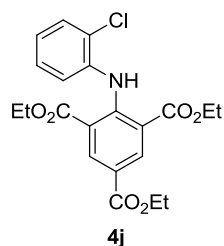

**4j:** Following the general procedure, the reaction of ethyl 2-(triphenylphosphoranylidene)acetate **1a** (174 mg, 0.50 mmol), ethyl propiolate **2a** (59 mg, 0.60 mmol) and 1-chloro-2-isocyanatobenzene **3j** (77 mg, 0.50 mmol) provided **4j** as pale yellow solid, in 84 mg, 80% yield, m. p: 115–117 °C;  $^1\text{H}$  NMR (400 MHz,  $\text{CDCl}_3$ )  $\delta$  10.27 (br s, 1H), 8.61 (s, 2H), 7.42 (dd,  $J$  = 8.1, 1.4 Hz, 1H), 7.13–7.09 (m, 1H), 7.03 (dd,  $J$  = 8.1, 1.4 Hz, 1H), 6.97 (td,  $J$  = 7.8, 1.5 Hz, 1H), 4.38 (q,  $J$  = 7.1 Hz, 2H), 4.04 (q,  $J$  = 7.1 Hz, 4H), 1.40 (t,  $J$  = 7.1 Hz, 3H), 1.23 (t,  $J$  = 7.1 Hz, 6H).  $^{13}\text{C}$  NMR (100 MHz,  $\text{CDCl}_3$ )  $\delta$  167.1, 165.0, 147.7, 139.5, 137.0, 130.1, 127.2, 126.0, 124.2, 120.4, 118.9, 118.1, 61.5, 61.1, 14.3, 13.9. IR  $\nu_{\text{max}}$  (neat): 3368, 3235, 2980, 2922, 2851, 1706, 1683, 1589, 1512, 1470, 1444, 1410, 1390, 1368, 1310, 1278, 1224, 1180, 1114, 1049, 1022, 949, 886, 863, 793, 782, 751, 731, 715, 689, 638, 536, 500, 469, 452, 421  $\text{cm}^{-1}$ . HRMS (ESI)  $m/z$ :  $[M+H]^+$  Calcd for  $\text{C}_{21}\text{H}_{23}\text{ClNO}_6$  420.1209; Found 420.1205.

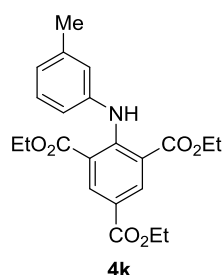

**4k:** Following the general procedure, the reaction of ethyl 2-(triphenylphosphoranylidene)acetate **1a** (174 mg, 0.50 mmol), ethyl propiolate **2a** (59 mg, 0.60 mmol) and 1-isocyanato-3-methylbenzene **3k** (66 mg, 0.50 mmol) provided **4k** as pale yellow solid, in 91 mg, 91% yield, m. p: 87–89 °C;  $^1\text{H}$  NMR (400 MHz,  $\text{CDCl}_3$ )  $\delta$  10.28 (br s, 1H), 8.57 (s, 2H), 7.15 (dd,  $J$  = 10.8, 5.1 Hz, 1H), 6.85 (d,  $J$  = 7.0 Hz, 3H),

4.37 (q,  $J = 7.1$  Hz, 2H), 4.02 (q,  $J = 7.1$  Hz, 4H), 2.28 (s, 3H), 1.39 (t,  $J = 7.1$  Hz, 3H), 1.22 (t,  $J = 7.1$  Hz, 6H).  $^{13}\text{C}$  NMR (100 MHz,  $\text{CDCl}_3$ )  $\delta$  167.3, 165.2, 148.7, 141.9, 139.2, 136.9, 129.1, 124.7, 120.3, 119.1, 118.1, 116.9, 61.32, 60.9, 21.3, 14.3, 13.9. IR  $\nu_{\text{max}}$  (neat): 3243, 2961, 2920, 2851, 1707, 1681, 1633, 1600, 1581, 1541, 1487, 1443, 1406, 1367, 1315, 1225, 1180, 1164, 1114, 1025, 948, 934, 908, 885, 869, 829, 788, 774, 759, 718, 702, 679, 660, 631, 578, 549, 511, 455, 442  $\text{cm}^{-1}$ . HRMS (ESI)  $m/z$ :  $[\text{M}+\text{H}]^+$  Calcd for  $\text{C}_{22}\text{H}_{26}\text{NO}_6$  400.1755; Found 400.1749.

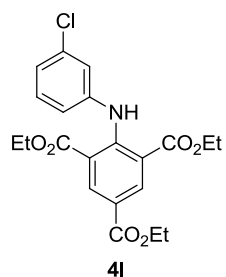

**4l:** Following the general procedure, the reaction of ethyl 2-(triphenylphosphoranylidene)acetate **1a** (174 mg, 0.50 mmol), ethyl propiolate **2a** (59 mg, 0.60 mmol) and 1-chloro-3-isocyanatobenzene **3l** (77 mg, 0.50 mmol) provided **4l** as pale yellow solid, in 85 mg, 81% yield, m. p: 94–96 °C;  $^1\text{H}$  NMR (400 MHz,  $\text{CDCl}_3$ )  $\delta$  10.27 (br s, 1H), 8.59 (s, 2H), 7.19 (t,  $J = 8.0$  Hz, 1H), 7.02–6.99 (m, 2H), 6.92 (dd,  $J = 8.0, 1.9$  Hz, 1H), 4.38 (q,  $J = 7.1$  Hz, 2H), 4.09 (q,  $J = 7.1$  Hz, 4H), 1.39 (t,  $J = 7.1$  Hz, 3H), 1.25 (t,  $J = 7.1$  Hz, 6H).  $^{13}\text{C}$  NMR (100 MHz,  $\text{CDCl}_3$ )  $\delta$  167.0, 165.0, 147.9, 143.5, 136.9, 134.9, 130.4, 123.7, 120.2, 119.5, 118.7, 117.7, 61.5, 61.1, 14.3, 13.9. IR  $\nu_{\text{max}}$  (neat): 3233, 3064, 2983, 2903, 1727, 1706, 1681, 1586, 1510, 1472, 1437, 1397, 1316, 1274, 1222, 1181, 1162, 1112, 1023, 945, 913, 882, 864, 796, 763, 722, 677, 655, 628, 580, 554, 518, 456, 444  $\text{cm}^{-1}$ . HRMS (ESI)  $m/z$ :  $[\text{M}+\text{H}]^+$  Calcd for  $\text{C}_{21}\text{H}_{23}\text{ClNO}_6$  420.1209; Found 420.1205.

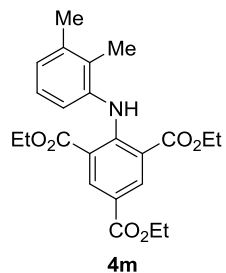

**4m:** Following the general procedure, the reaction of ethyl 2-(triphenylphosphoranylidene)acetate **1a** (174 mg, 0.50 mmol), ethyl propiolate **2a** (59 mg, 0.60 mmol) and 1-isocyanato-2,3-dimethylbenzene **3m** (73 mg, 0.50 mmol) provided **4m** as pale yellow solid, in 79 mg, 82% yield, m. p: 94–96 °C; <sup>1</sup>H NMR (400 MHz, CDCl<sub>3</sub>) δ 10.14 (br s, 1H), 8.66 (s, 2H), 6.96 (t, *J* = 7.7 Hz, 1H), 6.90 (d, *J* = 7.7 Hz, 1H), 6.83 (d, *J* = 7.7 Hz, 1H), 4.37 (q, *J* = 7.1 Hz, 2H), 3.98 (d, *J* = 5.4 Hz, 4H), 2.32 (s, 3H), 2.29 (s, 3H), 1.39 (t, *J* = 7.1 Hz, 3H), 1.21 (t, *J* = 7.1 Hz, 6H). <sup>13</sup>C NMR (100 MHz, CDCl<sub>3</sub>) δ 167.5, 165.3, 149.9, 140.6, 137.9, 136.9, 129.6, 126.2, 125.8, 118.5, 117.6, 117.2, 61.2, 60.9, 20.5, 14.4, 13.9. IR *v*<sub>max</sub> (neat): 3252, 2924, 2853, 1711, 1674, 1604, 1584, 1504, 1469, 1444, 1392, 1368, 1306, 1226, 1177, 1151, 1117, 1065, 1027, 948, 935, 868, 839, 799, 774, 761, 743, 715, 681, 633, 573, 508, 493 cm<sup>-1</sup>. HRMS (ESI) *m/z*: [M+H]<sup>+</sup> Calcd for C<sub>23</sub>H<sub>28</sub>NO<sub>6</sub> 414.1912; Found 414.1904.

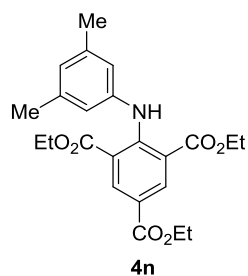

**4n:** Following the general procedure, the reaction of ethyl 2-(triphenylphosphoranylidene)acetate **1a** (174 mg, 0.50 mmol), ethyl propiolate **2a** (59 mg, 0.60 mmol) and 1-isocyanato-3,5-dimethylbenzene **3n** (73 mg, 0.50 mmol) provided **4n** as pale yellow solid, in 88 mg, 91% yield, m. p: 70–72 °C; <sup>1</sup>H NMR (400 MHz, CDCl<sub>3</sub>) δ 10.24 (br s, 1H), 8.56 (s, 2H), 6.67 (s, 3H), 4.37 (q, *J* = 7.1 Hz, 2H), 4.02 (q, *J* = 7.1 Hz, 4H), 2.24 (s, 6H), 1.39 (t, *J* = 7.1 Hz, 3H), 1.22 (t, *J* = 7.1 Hz, 6H). <sup>13</sup>C NMR (100 MHz, CDCl<sub>3</sub>) δ 167.3, 165.2, 148.7, 141.8, 139.0, 136.9, 125.6, 119.0, 118.1, 117.4, 61.3, 60.9, 21.2, 14.3, 13.9. IR *v*<sub>max</sub> (neat): 3252, 2983, 2917, 1708, 1682, 1592, 1512, 1467, 1445, 1408, 1366, 1321, 1290, 1247, 1227, 1181, 1116, 1094, 1024, 947, 935, 898, 869, 828, 798, 729, 712, 679, 619, 586, 550, 477 cm<sup>-1</sup>. HRMS (ESI) *m/z*: [M+H]<sup>+</sup> Calcd for C<sub>23</sub>H<sub>28</sub>NO<sub>6</sub> 414.1912; Found 414.1909.

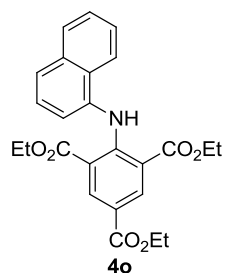

**4o:** Following the general procedure, the reaction of ethyl 2-(triphenylphosphoranylidene)acetate **1a** (174 mg, 0.50 mmol), ethyl propiolate **2a** (59 mg, 0.60 mmol) and 1-isocyanatophthalene **3o** (84 mg, 0.50 mmol) provided **4o** as pale yellow solid, in 90 mg, 88% yield, m. p: 87–89 °C;  $^1\text{H}$  NMR (400 MHz,  $\text{CDCl}_3$ )  $\delta$  10.67 (br s, 1H), 8.60 (s, 2H), 8.27 (d,  $J = 7.9$  Hz, 1H), 7.87–7.84 (m, 1H), 7.61–7.52 (m, 3H), 7.33 (t,  $J = 7.9$  Hz, 1H), 7.17 (d,  $J = 7.9$  Hz, 1H), 4.39 (q,  $J = 7.1$  Hz, 2H), 3.81 (s, 4H), 1.40 (t,  $J = 7.1$  Hz, 3H), 0.97 (t,  $J = 7.1$  Hz, 6H).  $^{13}\text{C}$  NMR (100 MHz,  $\text{CDCl}_3$ )  $\delta$  167.7, 165.2, 149.9, 138.5, 137.0, 134.4, 128.2, 128.2, 126.6, 126.4, 125.5, 124.7, 122.2, 119.3, 118.2, 115.2, 61.3, 60.9, 14.4, 13.6. IR  $\nu_{\text{max}}$  (neat): 3281, 3229, 3057, 2977, 2920, 2850, 1708, 1678, 1629, 1592, 1518, 1469, 1387, 1309, 1269, 1234, 1185, 1108, 1023, 948, 932, 891, 796, 752, 690, 646, 590, 544, 491, 420  $\text{cm}^{-1}$ . HRMS (ESI)  $m/z$ :  $[\text{M}+\text{H}]^+$  Calcd for  $\text{C}_{25}\text{H}_{26}\text{NO}_6$  436.1755; Found 436.1753.

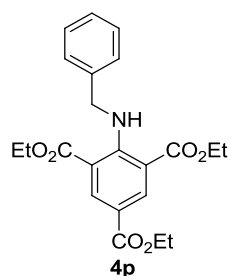

**4p:** Following the general procedure, the reaction of ethyl 2-(triphenylphosphoranylidene)acetate **1a** (174 mg, 0.50 mmol), ethyl propiolate **2a** (59 mg, 0.60 mmol) and (isocyanatomethyl)benzene **3p** (66 mg, 0.50 mmol) provided **4p** as pale yellow solid, in 45 mg, 45% yield, m. p: 34–36 °C;  $^1\text{H}$  NMR (400 MHz,  $\text{CDCl}_3$ )  $\delta$  9.16 (t,  $J = 4.6$  Hz, 1H), 8.55 (s, 2H), 7.36–7.26 (m, 5H), 4.39–4.31 (m, 6H), 4.29 (d,  $J = 4.6$  Hz, 2H), 1.41–1.35 (m, 9H).  $^{13}\text{C}$  NMR (100 MHz,  $\text{CDCl}_3$ )  $\delta$  167.7, 165.5, 152.8, 137.8, 137.2, 128.8, 127.7, 116.4, 115.3, 61.3, 60.7, 51.4, 14.4, 14.2. IR  $\nu_{\text{max}}$  (neat): 3242,

3062, 2980, 2932, 1705, 1683, 1599, 1511, 1464, 1393, 1367, 1317, 1221, 1170, 1150, 1096, 1082, 1028, 935, 866, 799, 762, 735, 700, 683, 594, 512, 491  $\text{cm}^{-1}$ . HRMS (ESI)  $m/z$ :  $[\text{M}+\text{H}]^+$  Calcd for  $\text{C}_{22}\text{H}_{26}\text{NO}_6$  400.1755; Found 400.1750.

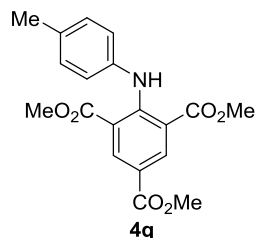

**4q:** Following the general procedure, the reaction of methyl 2-(triphenylphosphoranylidene)acetate **1b** (167 mg, 0.50 mmol), methyl propiolate **2b** (50 mg, 0.60 mmol) and 1-isocyanato-4-methylbenzene **3a** (66 mg, 0.50 mmol) provided **4q** as pale yellow solid, in 63 mg, 70% yield, m. p: 139–141  $^{\circ}\text{C}$ ;  $^1\text{H}$  NMR (400 MHz,  $\text{CDCl}_3$ )  $\delta$  10.23 (br s, 1H), 8.56 (s, 2H), 7.10 (d,  $J = 8.0$  Hz, 2H), 6.95 (d,  $J = 8.0$  Hz, 2H), 3.91 (s, 3H), 3.59 (s, 6H), 2.30 (s, 3H).  $^{13}\text{C}$  NMR (100 MHz,  $\text{CDCl}_3$ )  $\delta$  167.7, 165.6, 149.3, 139.3, 137.2, 133.9, 129.9, 120.4, 118.4, 117.3, 52.0, 20.8. IR  $\nu_{\text{max}}$  (neat): 3258, 2952, 2919, 2849, 1710, 1691, 1640, 1600, 1514, 1433, 1317, 1238, 1195, 1169, 1143, 1107, 1002, 936, 903, 888, 809, 780, 767, 757, 721, 686, 632, 529, 502, 475, 448  $\text{cm}^{-1}$ . HRMS (ESI)  $m/z$ :  $[\text{M}+\text{H}]^+$  Calcd for  $\text{C}_{19}\text{H}_{20}\text{NO}_6$  358.1286; Found 358.1284.

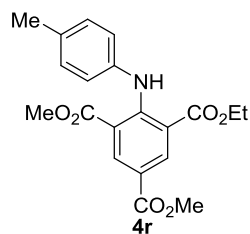

**4r:** Following the general procedure, the reaction of methyl 2-(triphenylphosphoranylidene)acetate **1b** (167 mg, 0.50 mmol), ethyl propiolate **2a** (59 mg, 0.60 mmol) and 1-isocyanato-4-methylbenzene **3a** (66 mg, 0.50 mmol) provided **4r** as pale yellow solid, in 83 mg, 89% yield, m. p: 92–94  $^{\circ}\text{C}$ ;  $^1\text{H}$  NMR (400 MHz,  $\text{CDCl}_3$ )  $\delta$  10.26 (br s, 1H), 8.67–8.64 (m, 2H), 7.09 (d,  $J = 8.3$  Hz, 2H), 6.95 (d,  $J = 8.3$  Hz, 2H), 4.05 (q,  $J = 7.1$  Hz, 2H), 3.91 (s, 3H), 3.58 (s, 3H), 2.30 (s, 3H), 1.25 (t,  $J = 7.1$  Hz, 3H).  $^{13}\text{C}$  NMR (100 MHz,  $\text{CDCl}_3$ )  $\delta$  167.7, 167.3, 165.6, 149.3, 137.1, 137.0, 133.8, 129.8,

120.3 118.4, 117.6, 117.4, 61.3, 52.0, 51.9, 20.8, 14.0. IR  $\nu_{\text{max}}$  (neat): 3247, 2948, 2922, 1714, 1692, 1604, 1579, 1517, 1431, 1365, 1322, 1279, 1239, 1194, 1174, 1025, 1004, 986, 934, 898, 867, 807, 797, 759, 721, 688, 657, 634, 561, 522, 506, 408  $\text{cm}^{-1}$ . HRMS (ESI)  $m/z$ :  $[\text{M}+\text{H}]^+$  Calcd for  $\text{C}_{20}\text{H}_{22}\text{NO}_6$  372.1442; Found 372.1443.

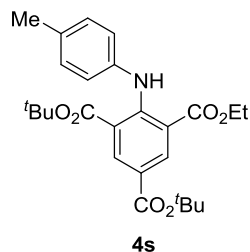

**4s:** Following the general procedure, the reaction of tert-butyl 2-(triphenylphosphoranylidene)acetate **1c** (188 mg, 0.50 mmol), ethyl propiolate **2a** (59 mg, 0.60 mmol) and 1-isocyanato-4-methylbenzene **3a** (66 mg, 0.50 mmol) provided **4s** as pale yellow liquid, in 91 mg, 80% yield;  $^1\text{H}$  NMR (400 MHz,  $\text{CDCl}_3$ )  $\delta$  10.22 (br s, 1H), 8.63–8.46 (m, 2H), 7.07 (d,  $J = 8.2$  Hz, 2H), 6.95 (d,  $J = 8.2$  Hz, 2H), 3.95 (q,  $J = 7.1$  Hz, 2H), 2.28 (s, 3H), 1.60 (s, 9H), 1.42 (s, 9H), 1.19 (t,  $J = 7.1$  Hz, 3H).  $^{13}\text{C}$  NMR (100 MHz,  $\text{CDCl}_3$ )  $\delta$  167.5, 166.6, 164.6, 148.8, 140.1, 137.0, 136.7, 133.3, 129.9, 120.5, 119.8, 118.9, 118.4, 82.1, 81.0, 61.2, 28.2, 27.8, 20.7, 13.9. IR  $\nu_{\text{max}}$  (neat): 3252, 2977, 2931, 1708, 1681, 1599, 1515, 1476, 1451, 1417, 1392, 1367, 1315, 1238, 1144, 1023, 952, 912, 881, 845, 806, 765, 731, 686, 646, 522, 503, 488, 461  $\text{cm}^{-1}$ . HRMS (ESI)  $m/z$ :  $[\text{M}+\text{H}]^+$  Calcd for  $\text{C}_{26}\text{H}_{34}\text{NO}_6$  456.2381; Found 456.2377.

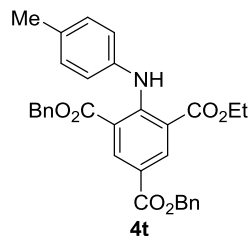

**4t:** Following the general procedure, the reaction of benzyl 2-(triphenylphosphoranylidene)acetate **1d** (205 mg, 0.50 mmol), ethyl propiolate **2a** (59 mg, 0.60 mmol) and 1-isocyanato-4-methylbenzene **3a** (66 mg, 0.50 mmol) provided **4t** as pale yellow liquid, in 107 mg, 82% yield;  $^1\text{H}$  NMR (400 MHz,  $\text{CDCl}_3$ )  $\delta$  10.26 (br s, 1H), 8.63–8.58 (m, 2H), 7.45–7.25 (m, 10H), 7.06 (d,  $J = 8.1$  Hz, 2H), 6.94 (d,  $J = 8.1$

Hz, 2H), 5.35 (s, 2H), 4.98 (s, 2H), 4.03–3.97 (m, 2H), 2.29 (s, 3H), 1.24–1.20 (m, 3H).  $^{13}\text{C}$  NMR (100 MHz,  $\text{CDCl}_3$ )  $\delta$  167.3, 167.1, 165.0, 149.4, 139.3, 137.3, 137.2, 136.0, 135.3, 133.9, 129.8, 128.5, 128.3, 128.2, 128.1, 120.3, 120.2, 118.4, 117.9, 117.4, 66.8, 66.6, 61.3, 20.8, 13.9. IR  $\nu_{\text{max}}$  (neat): 3254, 3031, 2923, 1712, 1683, 1600, 1514, 1452, 1374, 1307, 1217, 1172, 1136, 1106, 1023, 967, 907, 865, 803, 779, 754, 730, 694, 637, 598, 508, 494  $\text{cm}^{-1}$ . HRMS (ESI)  $m/z$ :  $[\text{M}+\text{H}]^+$  Calcd for  $\text{C}_{32}\text{H}_{30}\text{NO}_6$  524.2068; Found 524.2068.

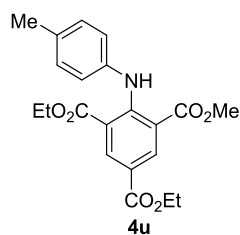

**4u:** Following the general procedure, the reaction of ethyl 2-(triphenylphosphoranylidene)acetate **1a** (174 mg, 0.50 mmol), methyl propiolate **2b** (50 mg, 0.60 mmol) and 1-isocyanato-4-methylbenzene **3a** (66 mg, 0.50 mmol) provided **4u** as pale yellow solid, in 78 mg, 81% yield, m. p: 72–74 °C;  $^1\text{H}$  NMR (400 MHz,  $\text{CDCl}_3$ )  $\delta$  10.24 (br s, 1H), 8.68–8.54 (m, 2H), 7.09 (d,  $J$  = 8.3 Hz, 2H), 6.95 (d,  $J$  = 8.3 Hz, 2H), 4.37 (q,  $J$  = 7.1 Hz, 2H), 4.04 (q,  $J$  = 7.1 Hz, 2H), 3.58 (s, 3H), 2.30 (s, 3H), 1.39 (t,  $J$  = 7.1 Hz, 3H), 1.24 (t,  $J$  = 7.1 Hz, 3H).  $^{13}\text{C}$  NMR (100 MHz,  $\text{CDCl}_3$ )  $\delta$  167.8, 167.3, 165.2, 149.2, 137.1, 137.0, 133.8, 129.8, 120.2, 118.8, 117.6, 117.4, 61.3, 60.9, 51.9, 20.8, 14.3, 14.0. IR  $\nu_{\text{max}}$  (neat): 3326, 3248, 3032, 2922, 2854, 1709, 1601, 1515, 1434, 1401, 1363, 1316, 1278, 1234, 1193, 1174, 1069, 1024, 990, 935, 881, 867, 839, 811, 797, 760, 720, 685, 634, 561, 522, 508  $\text{cm}^{-1}$ . HRMS (ESI)  $m/z$ :  $[\text{M}+\text{H}]^+$  Calcd for  $\text{C}_{21}\text{H}_{24}\text{NO}_6$  386.1599; Found 386.1596.

## 5. Optimization of Conditions for The Synthesis of Biaryls **11**

Table S1. Optimization of Reaction Conditions<sup>a</sup>

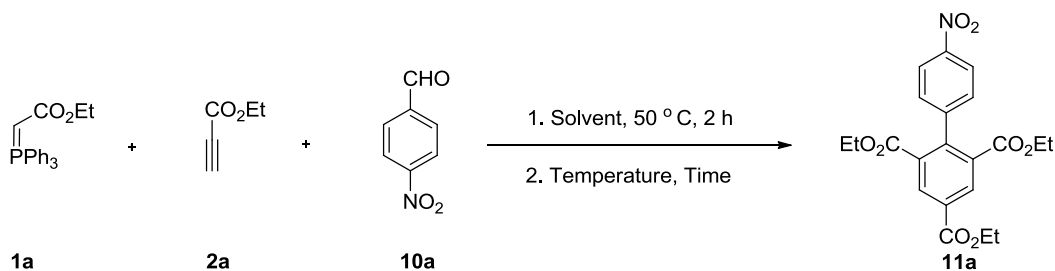

| Entry          | Solvent        | Temp. (°C) | Time (h)    | <b>11a</b> (%) <sup>[b]</sup> |
|----------------|----------------|------------|-------------|-------------------------------|
| 1              | 1,2-DCE        | 100        | 12 h        | 44%                           |
| 2 <sup>c</sup> | 1,2-DCE        | 100        | 12 h        | 33%                           |
| 3 <sup>c</sup> | 1,2-DCE        | 100        | 24 h        | 38%                           |
| 4              | 1,2-DCE        | 100        | 24 h        | 47%                           |
| 5              | Toluene        | 120        | 24 h        | 57%                           |
| <b>6</b>       | <b>Toluene</b> | <b>120</b> | <b>36 h</b> | <b>74%</b>                    |
| 7 <sup>c</sup> | Toluene        | 120        | 36 h        | 51%                           |
| 8              | Xylene         | 120        | 36 h        | 65%                           |
| 9              | DMSO           | 120        | 36 h        | 47%                           |
| 10             | DMF            | 140        | 36 h        | 53%                           |

<sup>a</sup> Reaction conditions: P-ylide **1a** (0.50 mmol) and ethyl propiolate **2a** (0.60 mmol) were stirred for 2 h in the specified solvent (2.0 mL) at 50 °C under N<sub>2</sub> atmosphere, after cooling the reaction mixture to room temperature then aldehyde **10a** (0.50 mmol) was added to the reaction mixture under N<sub>2</sub> atmosphere and stirred for specified time at the indicated temperature. <sup>b</sup> Yield of isolated product. <sup>c</sup> Aldehyde **10a** (0.250 mmol) was used.

## 6. General Procedure for The Synthesis of Biaryls **11**

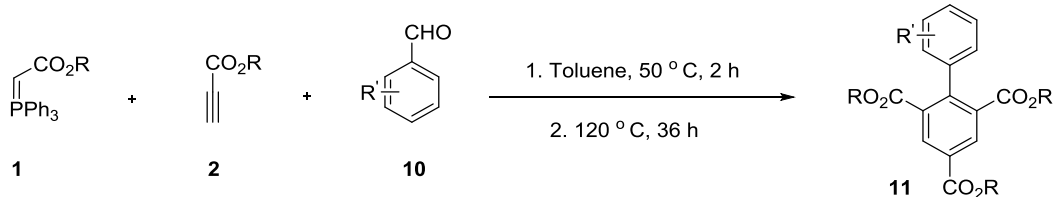

Under N<sub>2</sub> atmosphere, to a solution of P-ylide **1** (0.50 mmol) in toluene (2.0 mL) was added alkyl propiolate **2** (0.60 mmol). The mixture was stirred at 50 °C for 2 h. The reaction mixture was cooled to room temperature, then aldehyde **10** (0.50 mmol) was added to the reaction mixture. The mixture was stirred at 120 °C for 36 h. Then, the reaction mixture was cooled to ambient temperature. The solvent was removed by rotary evaporation under reduced pressure and to the residue added water (5.0 mL) and the reaction mixture was extracted with ethyl acetate, dried over MgSO<sub>4</sub>, and concentrated in vacuo, and the residue was purified by column chromatography on silica gel (ethyl acetate/ petroleum ether) to yield **11**.

### A scaled-up synthesis of compound **11a**:

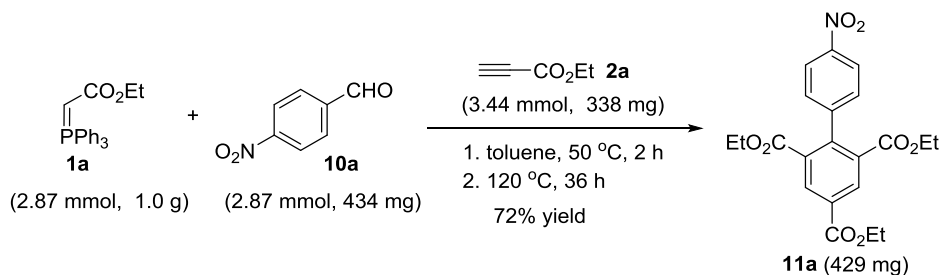

Under N<sub>2</sub> atmosphere and at rt, in a Schlenk tube (50 mL) was added P-ylide **1a** (2.87 mmol, 1.0 g) and toluene (10 mL), which was followed by the addition of ethyl propiolate **2a** (3.44 mmol, 338 mg) by syringe in one portion. The mixture was stirred at 50 °C for 2 h, at that time P-ylide **1a** was completely consumed as monitored by TLC. The reaction was cooled down to room temperature, and 4-nitrobenzaldehyde (2.87 mmol, 434 mg) was added in one portion. The mixture was then stirred at 120 °C for 36 h. The solvent was removed by rotary evaporation under reduced pressure and water (10.0 mL) was added. The mixture was extracted with ethyl acetate, dried over MgSO<sub>4</sub>, and concentrated in vacuo, and the residue was purified by column chromatography on

silica gel (ethyl acetate/ petroleum ether) to afford the product **11a** as colourless liquid in 429 mg, 72% yield.

## 7. Analytical Data for Biaryls **11**

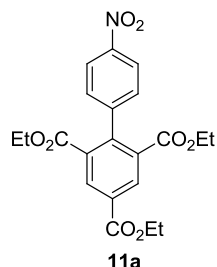

**11a:** Following the general procedure, the reaction of ethyl 2-(triphenylphosphoranylidene)acetate **1a** (174 mg, 0.50 mmol), ethyl propiolate **2a** (59 mg, 0.60 mmol) and 4-nitrobenzaldehyde **10a** (75 mg, 0.50 mmol) provided **11a** as colourless liquid, in 77 mg, 74% yield;  $^1\text{H}$  NMR (400 MHz,  $\text{CDCl}_3$ )  $\delta$  8.65 (s, 2H), 8.26 (d,  $J = 8.8$  Hz, 2H), 7.38 (d,  $J = 8.8$  Hz, 2H), 4.46 (q,  $J = 7.1$  Hz, 2H), 4.08 (q,  $J = 7.1$  Hz, 4H), 1.44 (t,  $J = 7.1$  Hz, 3H), 1.05 (t,  $J = 7.1$  Hz, 6H).  $^{13}\text{C}$  NMR (100 MHz,  $\text{CDCl}_3$ )  $\delta$  165.9, 164.5, 147.3, 145.9, 143.5, 133.3, 132.9, 130.8, 129.2, 122.7, 61.9, 61.7, 14.2, 13.7. IR  $\nu_{\text{max}}$  (neat): 2982, 2938, 1719, 1598, 1519, 1448, 1391, 1367, 1344, 1234, 1189, 1142, 1105, 1021, 931, 853, 804, 768, 757, 698, 518  $\text{cm}^{-1}$ . HRMS (ESI)  $m/z$ :  $[\text{M}+\text{Na}]^+$  Calcd for  $\text{C}_{21}\text{H}_{21}\text{NO}_8\text{Na}$  438.1160; Found 438.1156.

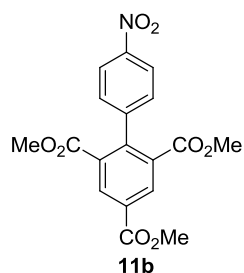

**11b:** Following the general procedure, the reaction of ethyl 2-(triphenylphosphoranylidene)acetate **1a** (174 mg, 0.50 mmol), methyl propiolate **2b** (50 mg, 0.60 mmol) and 4-nitrobenzaldehyde **10a** (75 mg, 0.50 mmol) provided **11b** as colourless liquid, in 56 mg, 60% yield;  $^1\text{H}$  NMR (400 MHz,  $\text{CDCl}_3$ )  $\delta$  8.7 (s, 2H), 8.26 (d,  $J = 8.8$  Hz, 2H), 7.36 (d,  $J = 8.8$  Hz, 2H), 4.00 (s, 3H), 3.65 (s, 6H).  $^{13}\text{C}$  NMR (100 MHz,  $\text{CDCl}_3$ )  $\delta$  166.0, 164.9, 147.3, 145.5, 144.3, 133.7, 132.6, 130.5, 129.1, 122.8, 52.7,

52.5. IR  $\nu_{\text{max}}$  (neat): 3010, 2956, 2849, 1724, 1599, 1575, 1511, 1436, 1337, 1287, 1233, 1203, 1139, 1108, 1001, 985, 943, 925, 890, 862, 854, 832, 808, 775, 755, 728, 704, 535, 506, 463  $\text{cm}^{-1}$ . HRMS (ESI)  $m/z$ :  $[\text{M}+\text{H}]^+$  Calcd for  $\text{C}_{18}\text{H}_{16}\text{NO}_8$  374.0871; Found 374.0863.

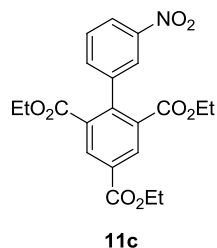

**11c:** Following the general procedure, the reaction of ethyl 2-(triphenylphosphoranylidene)acetate **1a** (174 mg, 0.50 mmol), ethyl propiolate **2a** (59 mg, 0.60 mmol) and 3-nitrobenzaldehyde **10b** (75 mg, 0.50 mmol) provided **11c** as colourless liquid, in 74 mg, 71% yield;  $^1\text{H}$  NMR (400 MHz,  $\text{CDCl}_3$ )  $\delta$  8.66 (d,  $J = 1.0$  Hz, 2H), 8.28–8.26 (m, 1H), 8.11 (d,  $J = 1.0$  Hz, 1H), 7.60–7.54 (m, 1H), 4.47 (qd,  $J = 7.1$ , 1.2 Hz, 2H), 4.09 (qd,  $J = 7.1$ , 1.2 Hz, 4H), 1.45 (td,  $J = 7.1$ , 1.5 Hz, 3H), 1.05 (td,  $J = 7.1$ , 1.5 Hz, 6H).  $^{13}\text{C}$  NMR (100 MHz,  $\text{CDCl}_3$ )  $\delta$  165.4, 164.7, 147.9, 144.3, 135.6, 134.4, 132.9, 131.4, 130.3, 129.8, 128.5, 124.1, 61.5, 14.3, 13.7. IR  $\nu_{\text{max}}$  (neat): 3084, 2982, 2936, 1719, 1609, 1576, 1529, 1447, 1414, 1348, 1326, 1233, 1188, 1113, 1093, 1020, 931, 875, 861, 806, 765, 735, 712, 687, 655  $\text{cm}^{-1}$ . HRMS (ESI)  $m/z$ :  $[\text{M}+\text{Na}]^+$  Calcd for  $\text{C}_{21}\text{H}_{21}\text{NO}_8\text{Na}$  438.1160; Found 438.1156.

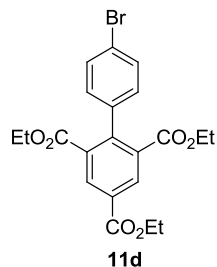

**11d:** Following the general procedure, the reaction of ethyl 2-(triphenylphosphoranylidene)acetate **1a** (174 mg, 0.50 mmol), ethyl propiolate **2a** (59 mg, 0.60 mmol) and 4-bromobenzaldehyde **10c** (92 mg, 0.50 mmol) was conducted in sealed tube at 140  $^{\circ}\text{C}$  which provided **11d** as colourless liquid, in 57 mg, 52% yield;  $^1\text{H}$

NMR (400 MHz,  $\text{CDCl}_3$ )  $\delta$  8.54 (s, 2H), 7.51 (d,  $J = 8.3$  Hz, 2H), 7.09 (d,  $J = 8.3$  Hz, 2H), 4.44 (q,  $J = 7.1$  Hz, 2H), 4.08 (q,  $J = 7.1$  Hz, 4H), 1.43 (t,  $J = 7.1$  Hz, 3H), 1.03 (t,  $J = 7.1$  Hz, 6H).  $^{13}\text{C}$  NMR (100 MHz,  $\text{CDCl}_3$ )  $\delta$  166.8, 164.7, 143.9, 137.5, 133.7, 132.6, 130.8, 130.1, 129.9, 121.9, 61.7, 61.6, 14.3, 13.6. IR  $\nu_{\text{max}}$  (neat): 2981, 2919, 2850, 1720, 1632, 1607, 1491, 1448, 1416, 1391, 1367, 1326, 1236, 1186, 1095, 1071, 1022, 1001, 928, 862, 826, 802, 767, 712, 695, 630, 520  $\text{cm}^{-1}$ . HRMS (ESI)  $m/z$ :  $[\text{M}+\text{Na}]^+$  Calcd for  $\text{C}_{21}\text{H}_{21}\text{BrO}_6\text{Na}$  471.0414; Found 471.0412.

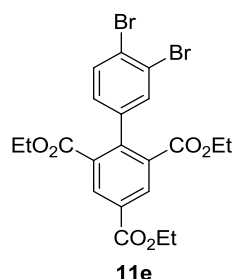

**11e:** Following the general procedure, the reaction of ethyl 2-(triphenylphosphoranylidene)acetate **1a** (174 mg, 0.50 mmol), ethyl propiolate **2a** (59 mg, 0.60 mmol) and 3,4-dibromobenzaldehyde **10d** (132 mg, 0.50 mmol) provided **11e** as colourless liquid, in 65 mg, 49% yield;  $^1\text{H}$  NMR (400 MHz,  $\text{CDCl}_3$ )  $\delta$  8.6 (s, 2H), 7.63 (d,  $J = 8.2$  Hz, 1H), 7.49 (d,  $J = 2.0$  Hz, 1H), 7.03 (dd,  $J = 8.2, 2.0$  Hz, 1H), 4.45 (q,  $J = 7.1$  Hz, 2H), 4.13 (q,  $J = 7.1$  Hz, 4H), 1.44 (t,  $J = 7.1$  Hz, 3H), 1.08 (t,  $J = 7.1$  Hz, 6H).  $^{13}\text{C}$  NMR (100 MHz,  $\text{CDCl}_3$ )  $\delta$  166.4, 164.6, 142.6, 139.3, 133.4, 133.3, 132.9, 132.6, 130.5, 128.6, 124.1, 124.0, 61.8, 61.7, 14.2, 13.7. IR  $\nu_{\text{max}}$  (neat): 2980, 2918, 2850, 1718, 1606, 1544, 1448, 1414, 1390, 1367, 1325, 1232, 1187, 1141, 1109, 1020, 1009, 930, 861, 822, 766, 712, 658, 556, 436  $\text{cm}^{-1}$ . HRMS (ESI)  $m/z$ :  $[\text{M}+\text{H}]^+$  Calcd for  $\text{C}_{21}\text{H}_{21}\text{Br}_2\text{O}_6$  528.9679; Found 528.9682.

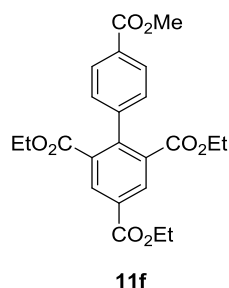

**11f:** Following the general procedure, the reaction of ethyl 2-(triphenylphosphoranylidene)acetate **1a** (174 mg, 0.50 mmol), ethyl propiolate **2a** (59 mg, 0.60 mmol) and methyl 4-formylbenzoate **10e** (82 mg, 0.50 mmol) provided **11f** as colourless liquid, in 42 mg, 39% yield;  $^1\text{H}$  NMR (400 MHz,  $\text{CDCl}_3$ )  $\delta$  8.58 (s, 2H), 8.07 (d,  $J = 8.2$  Hz, 2H), 7.30 (d,  $J = 8.2$  Hz, 2H), 4.45 (q,  $J = 7.1$  Hz, 2H), 4.04 (q,  $J = 7.1$  Hz, 4H), 3.95 (s, 3H), 1.44 (t,  $J = 7.1$  Hz, 3H), 0.97 (t,  $J = 7.1$  Hz, 6H).  $^{13}\text{C}$  NMR (100 MHz,  $\text{CDCl}_3$ )  $\delta$  166.7, 166.7, 164.6, 144.2, 143.6, 133.5, 132.7, 130.3, 129.3, 128.8, 128.3, 61.7, 61.5, 52.1, 14.2, 13.6. IR  $\nu_{\text{max}}$  (neat): 2982, 1716, 1606, 1437, 1403, 1367, 1326, 1274, 1232, 1185, 1099, 1022, 929, 860, 826, 804, 765, 732, 706, 555, 474  $\text{cm}^{-1}$ . HRMS (ESI)  $m/z$ :  $[\text{M}+\text{H}]^+$  Calcd for  $\text{C}_{23}\text{H}_{25}\text{O}_8$  429.1544; Found 429.1538.

## 8. Control Experiment

### A) Synthesis of P-ylide **C2**<sup>1</sup>

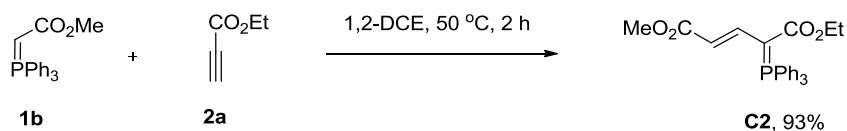

Under  $\text{N}_2$  atmosphere, to a solution of P-ylide **1b** (167 mg, 0.50 mmol) in 1,2-dichloroethane (2.0 mL) was added ethyl propiolate **2a** (59 mg, 0.50 mmol). The reaction mixture was stirred at 50  $^\circ\text{C}$  for 2 h. Then, the reaction mixture was cooled to ambient temperature. The solvent was removed by rotary evaporation under reduced pressure and the residue was purified by column chromatography on silica gel (ethyl acetate/ petroleum ether) to yield compound **C2** (201 mg, 93%) as a yellow solid;  $^1\text{H}$  NMR (400 MHz,  $\text{CDCl}_3$ )  $\delta$  7.64–7.68 (m, 9H), 7.52 (dt,  $J = 7.6, 3.8$  Hz, 6H), 7.03 (dd,  $J = 17.5, 14.6$  Hz, 1H), 6.28 (d,  $J = 14.5$  Hz, 1H), 3.94 (q,  $J = 7.0$  Hz, 2H), 3.56 (s, 3H), 0.85 (t,  $J = 7.0$  Hz, 3H).  $^{13}\text{C}$  NMR (100 MHz,  $\text{CDCl}_3$ )  $\delta$  170.8, 168.1 (d,  $J_{\text{C-P}} = 15.4$  Hz), 145.5 (d,  $J_{\text{C-P}} = 15.8$  Hz), 133.6 (d,  $J_{\text{C-P}} = 9.7$  Hz), 132.5 (d,  $J_{\text{C-P}} = 2.9$  Hz), 128.9 (d,  $J_{\text{C-P}} = 12.4$  Hz), 125.0 (d,  $J_{\text{C-P}} = 92.1$  Hz), 100.7 (d,  $J_{\text{C-P}} = 15.2$  Hz), 58.7 (d,  $J_{\text{C-P}} = 121.0$  Hz), 58.7, 50.3, 14.1. **C2** is a known compound, the NMR data are consistent with those reported.<sup>1</sup>

## B) Synthesis of Aniline Derivative **4r**

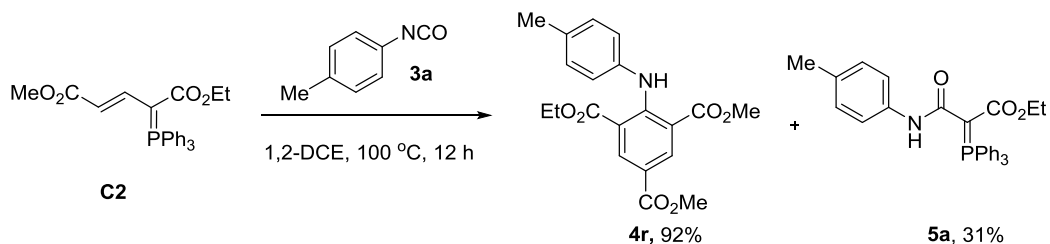

Under N<sub>2</sub> atmosphere, to a solution of P-ylide **C2** (173 mg, 0.40 mmol) in 1,2-dichloroethane (2.0 mL) was added isocyanate **3a** (53 mg, 0.40 mmol). The reaction mixture was stirred at 100 °C for 12 h. Then, the reaction mixture was cooled to ambient temperature. The solvent was removed by rotary evaporation under reduced pressure and the residue was purified by column chromatography on silica gel (ethyl acetate/petroleum ether) to yield compounds **4r** (68 mg, 92%) and **5a**<sup>2</sup> (30 mg, 31%).

## 9. X-ray Crystallographic Data

**4a**: Single crystal of compound **4a** was obtained by recrystallization from mixed solvents of dichloromethane and petroleum ether. The structure is shown in Figure S1. CIF file of **4a** can be obtained from the Cambridge Crystallographic Data Center using deposition number CCDC: 1974263.

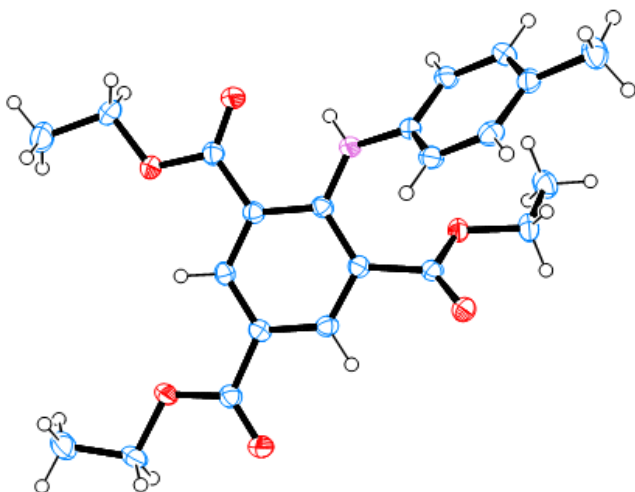

**Figure S1.** X-ray Single Crystal Structure of **4a**

**Table S1.** Crystal Data and Structure Refinement for **4a**

|                                   |                                                 |
|-----------------------------------|-------------------------------------------------|
| Identification code               | <b>4a</b>                                       |
| Empirical formula                 | C <sub>22</sub> H <sub>25</sub> NO <sub>6</sub> |
| Formula weight                    | 399.43                                          |
| Temperature                       | 296(2) K                                        |
| Wavelength                        | 0.71073 Å                                       |
| Crystal system                    | Monoclinic                                      |
| Space group                       | P2 <sub>1</sub> /n                              |
|                                   | a = 11.0462(17) Å, α = 90°                      |
| Unit cell dimensions              | b = 14.645(2) Å, β = 107.712(2)°                |
|                                   | c = 13.553(2) Å, γ = 90°                        |
| Volume                            | 2088.6(6) Å <sup>3</sup>                        |
| Z                                 | 4                                               |
| Calculated density                | 1.270 Mg/m <sup>3</sup>                         |
| Absorption coefficient            | 0.093 mm <sup>-1</sup>                          |
| F(000)                            | 848                                             |
| Crystal size                      | 0.130 × 0.120 × 0.100 mm <sup>3</sup>           |
| θ range for data collection       | 2.092 to 26.554 °                               |
| Limiting indices                  | -13 ≤ h ≤ 13, -18 ≤ k ≤ 18, -16 ≤ l ≤ 17        |
| Reflections collected             | 22029                                           |
| Independent reflections           | 4320 [R(int) = 0.0297]                          |
| Completeness to θ = 25.02°        | 100.0 %                                         |
| Absorption correction             | Semi-empirical from equivalents                 |
| Max. and min. transmission        | 0.991 and 0.988                                 |
| Refinement method                 | Full-matrix least-squares on F <sup>2</sup>     |
| Data / restraints / parameters    | 4320 / 0 / 262                                  |
| Goodness-of-fit on F <sup>2</sup> | 1.024                                           |
| Final R indices [I > 2σ(I)]       | R1 = 0.0409, wR2 = 0.1034                       |
| R indices (all data)              | R1 = 0.0547, wR2 = 0.1130                       |
| Extinction coefficient            | n/a                                             |
| Largest diff. peak and hole       | 0.399 and -0.222 e. Å <sup>-3</sup>             |

## 10. References

1. Barluenga, J.; Lopez, F.; Palacios, F. *Tetrahedron Lett.* **1988**, 29, 381–384.
2. Compound **5a** is a known compound, see: Kaki, R. B.; Han, W.; Chen, J.-B.; Li, Y.; Tang, Y.; Zhang, W.; Xu, W.; Xu, S., *Chem. Commun.* **2020**, 56, 5909–5912.

# 11. <sup>1</sup>H and <sup>13</sup>C NMR Spectra Copies

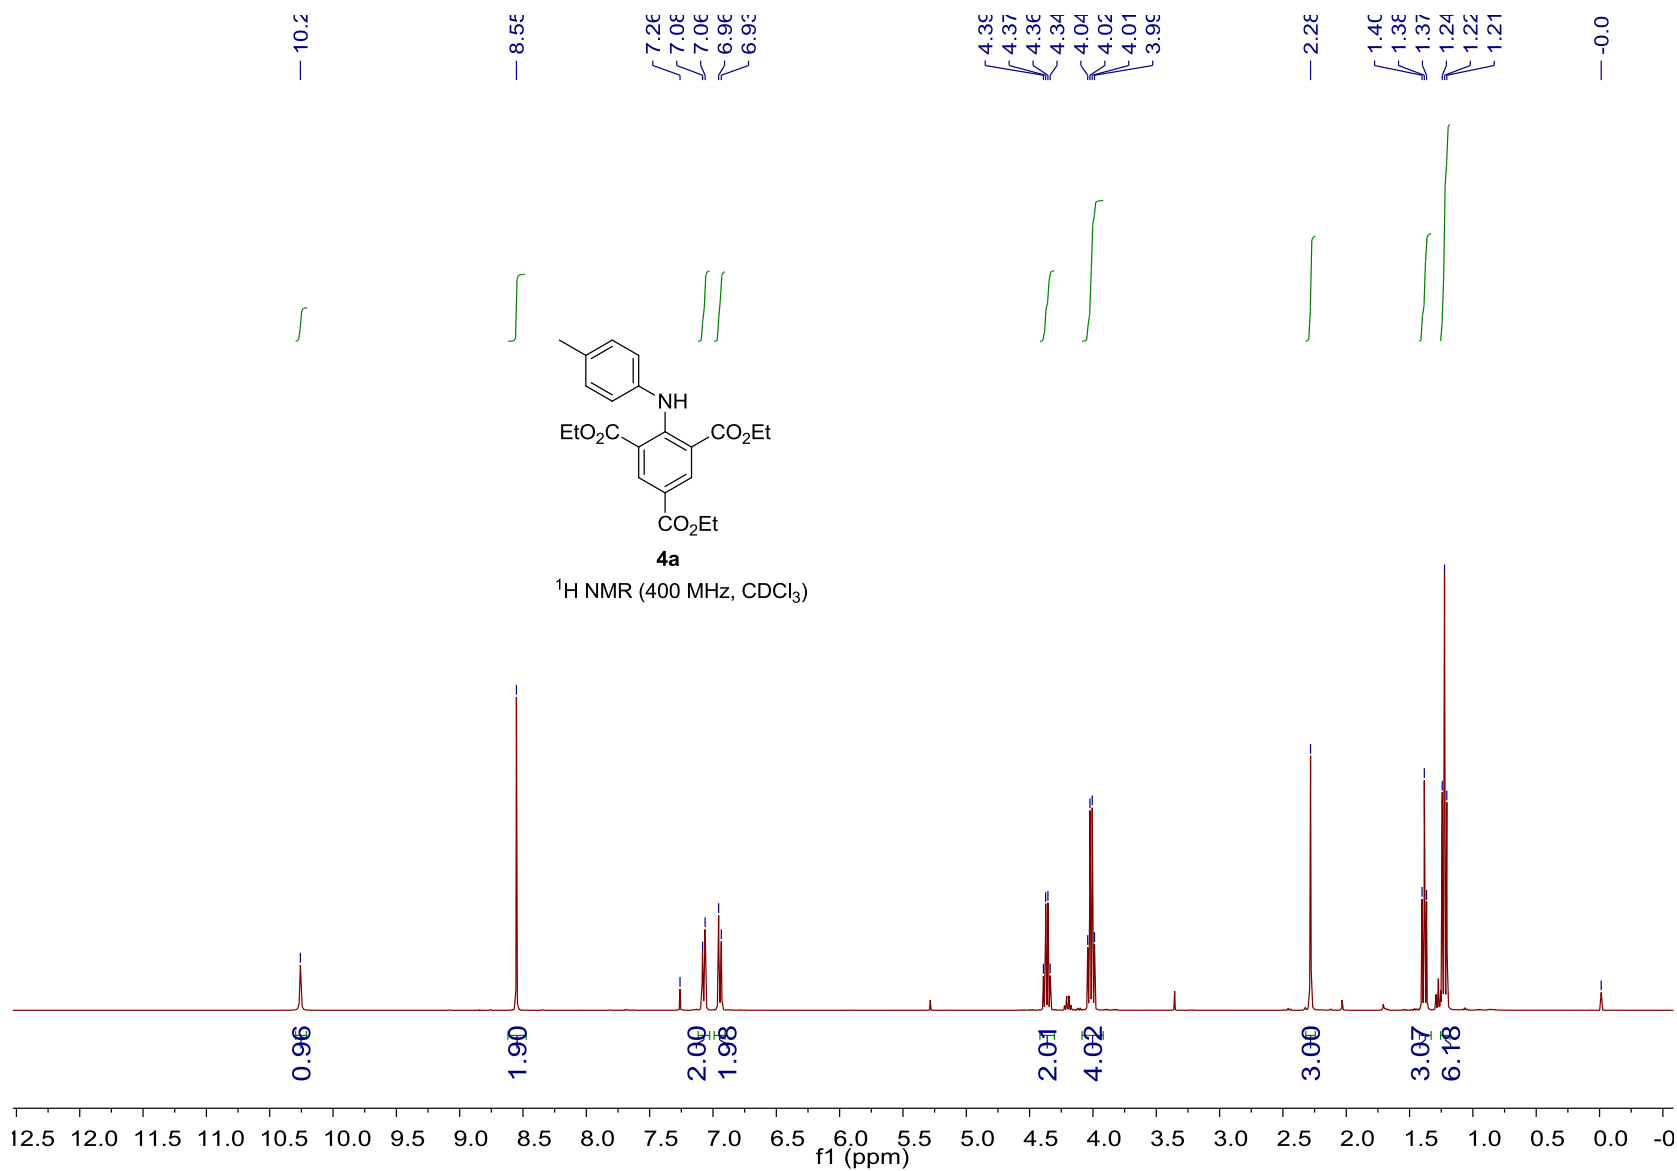

167.3  
165.3

149.3

139.3  
137.1  
133.1  
129.3

120.3  
118.3  
117.3

77.3  
77.0  
76.6

61.2  
60.9

20.7  
14.3  
14.0

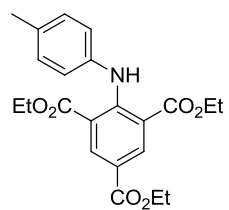

4a

<sup>13</sup>C NMR (100 MHz, CDCl<sub>3</sub>)

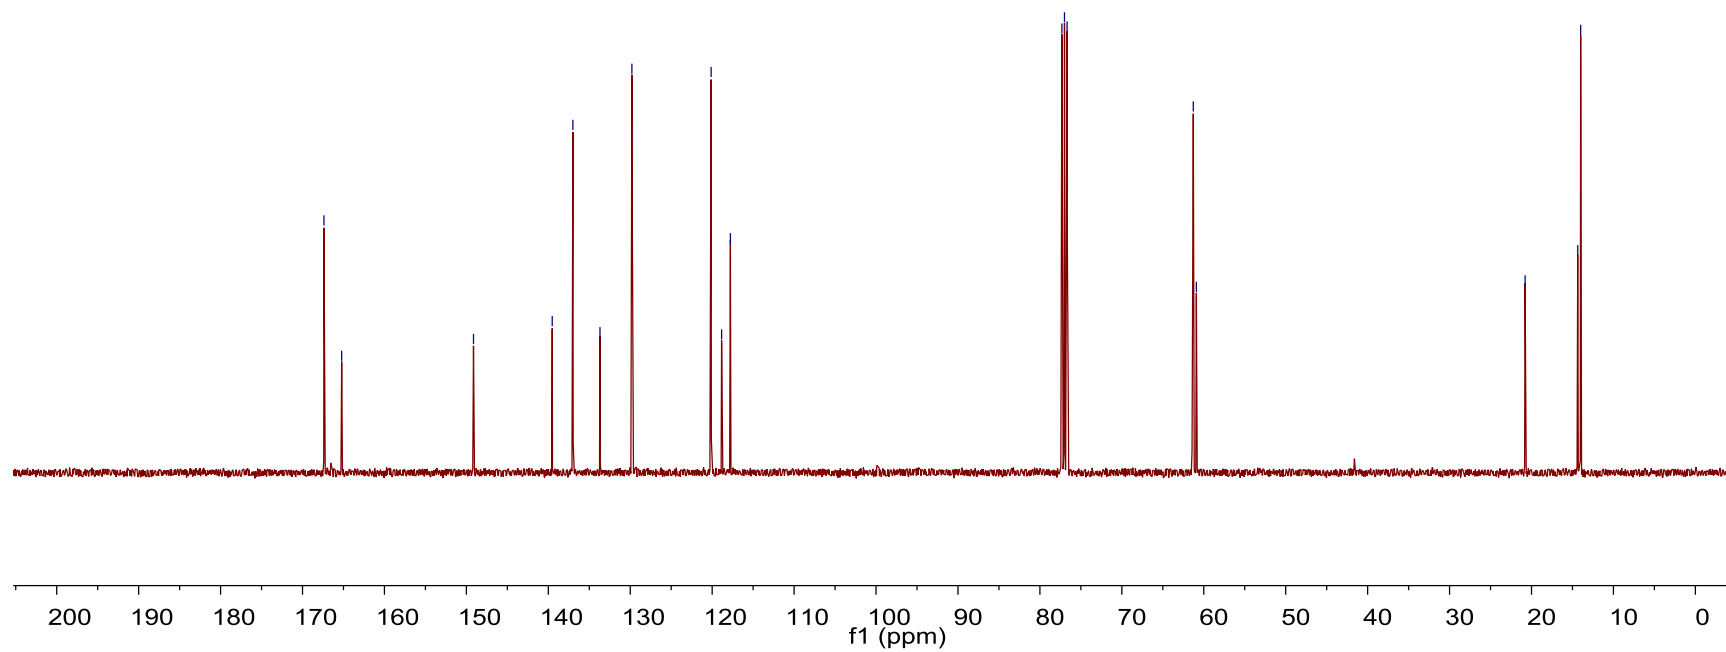

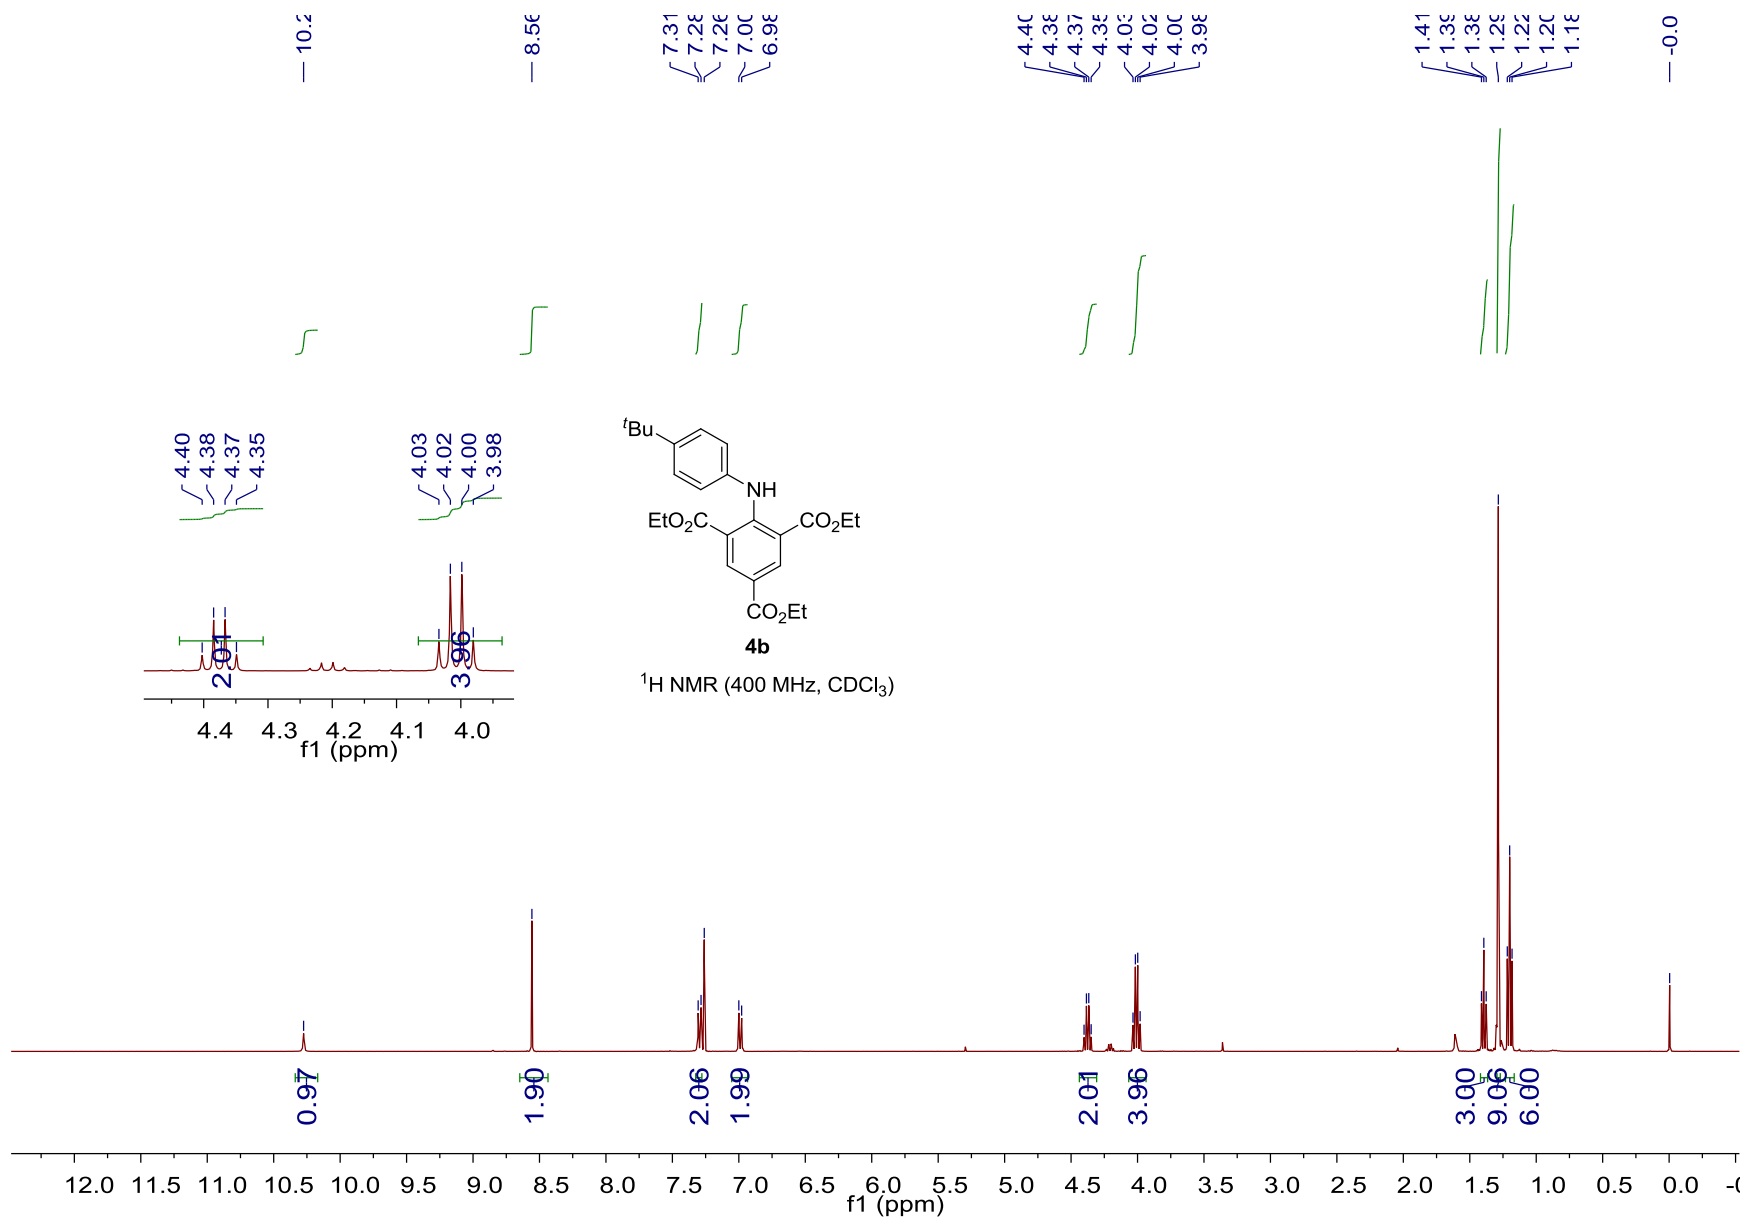

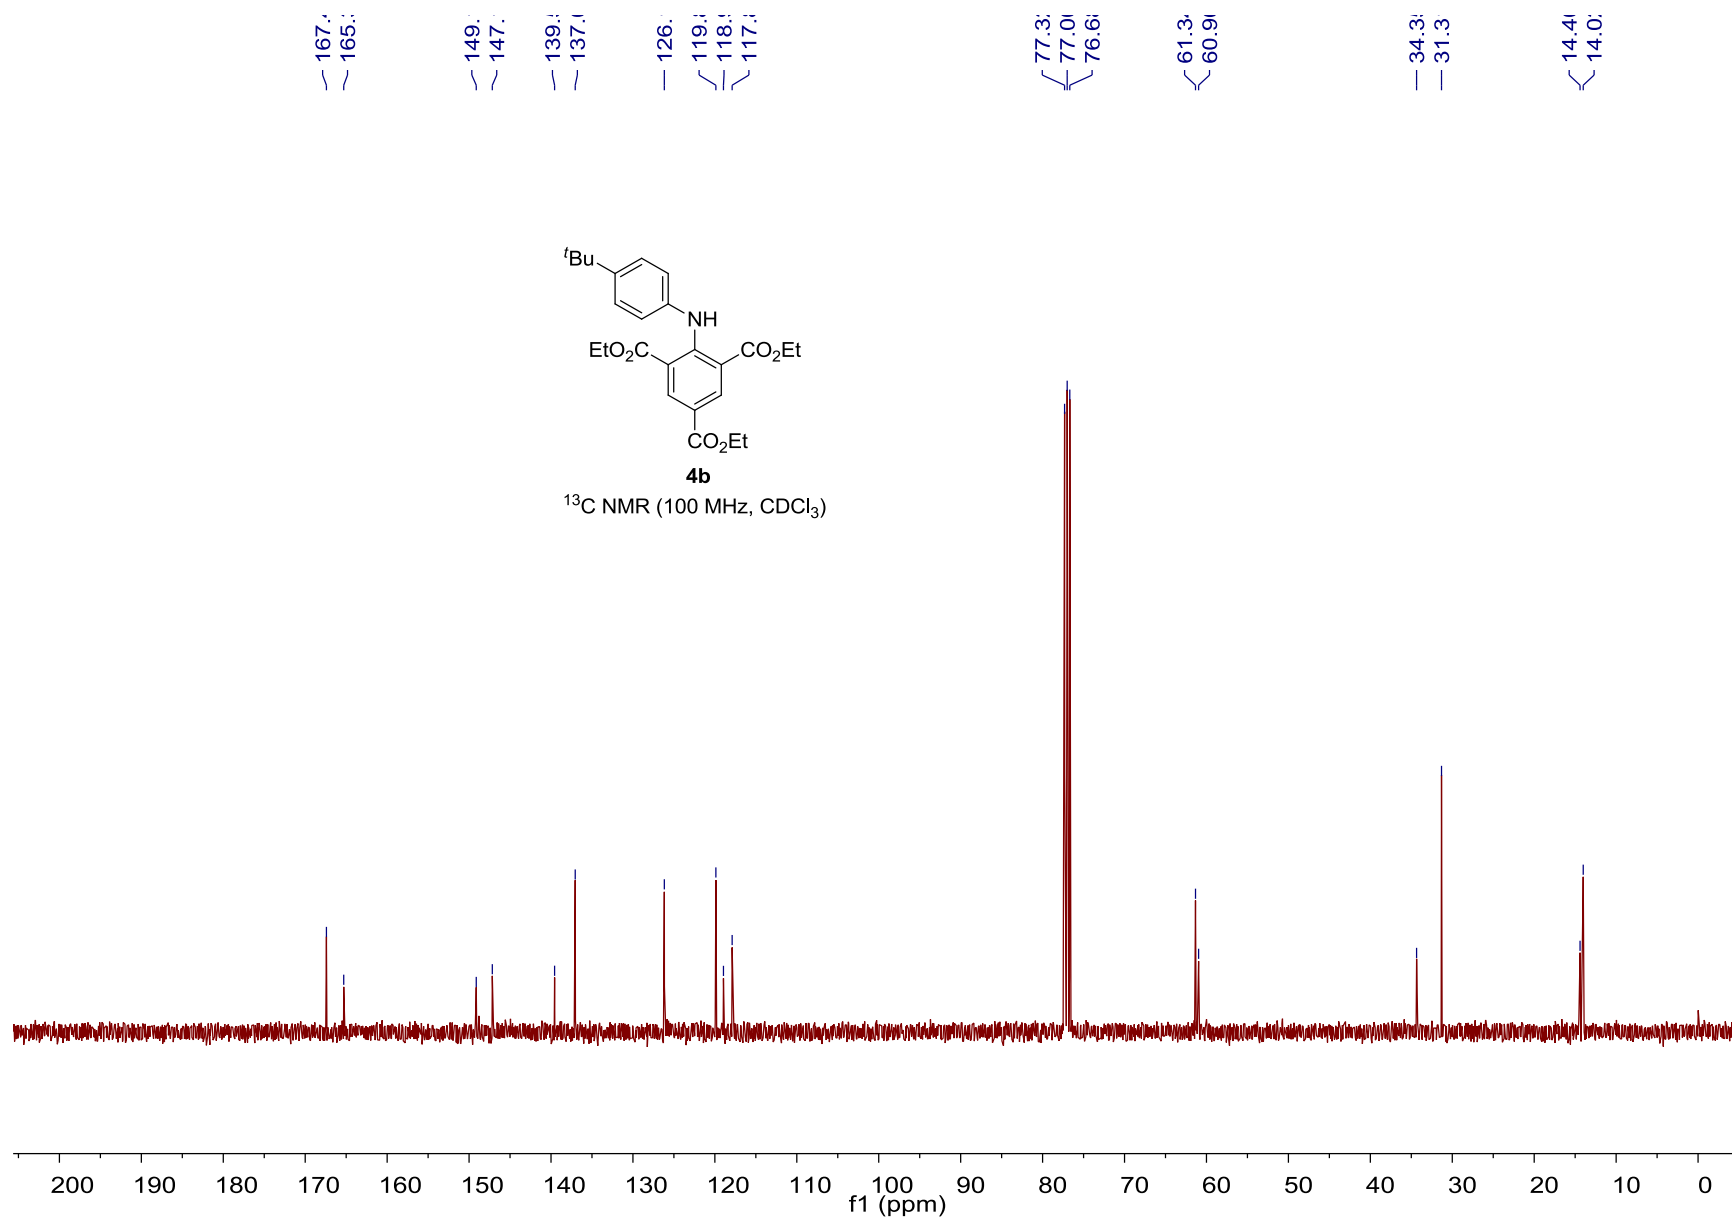

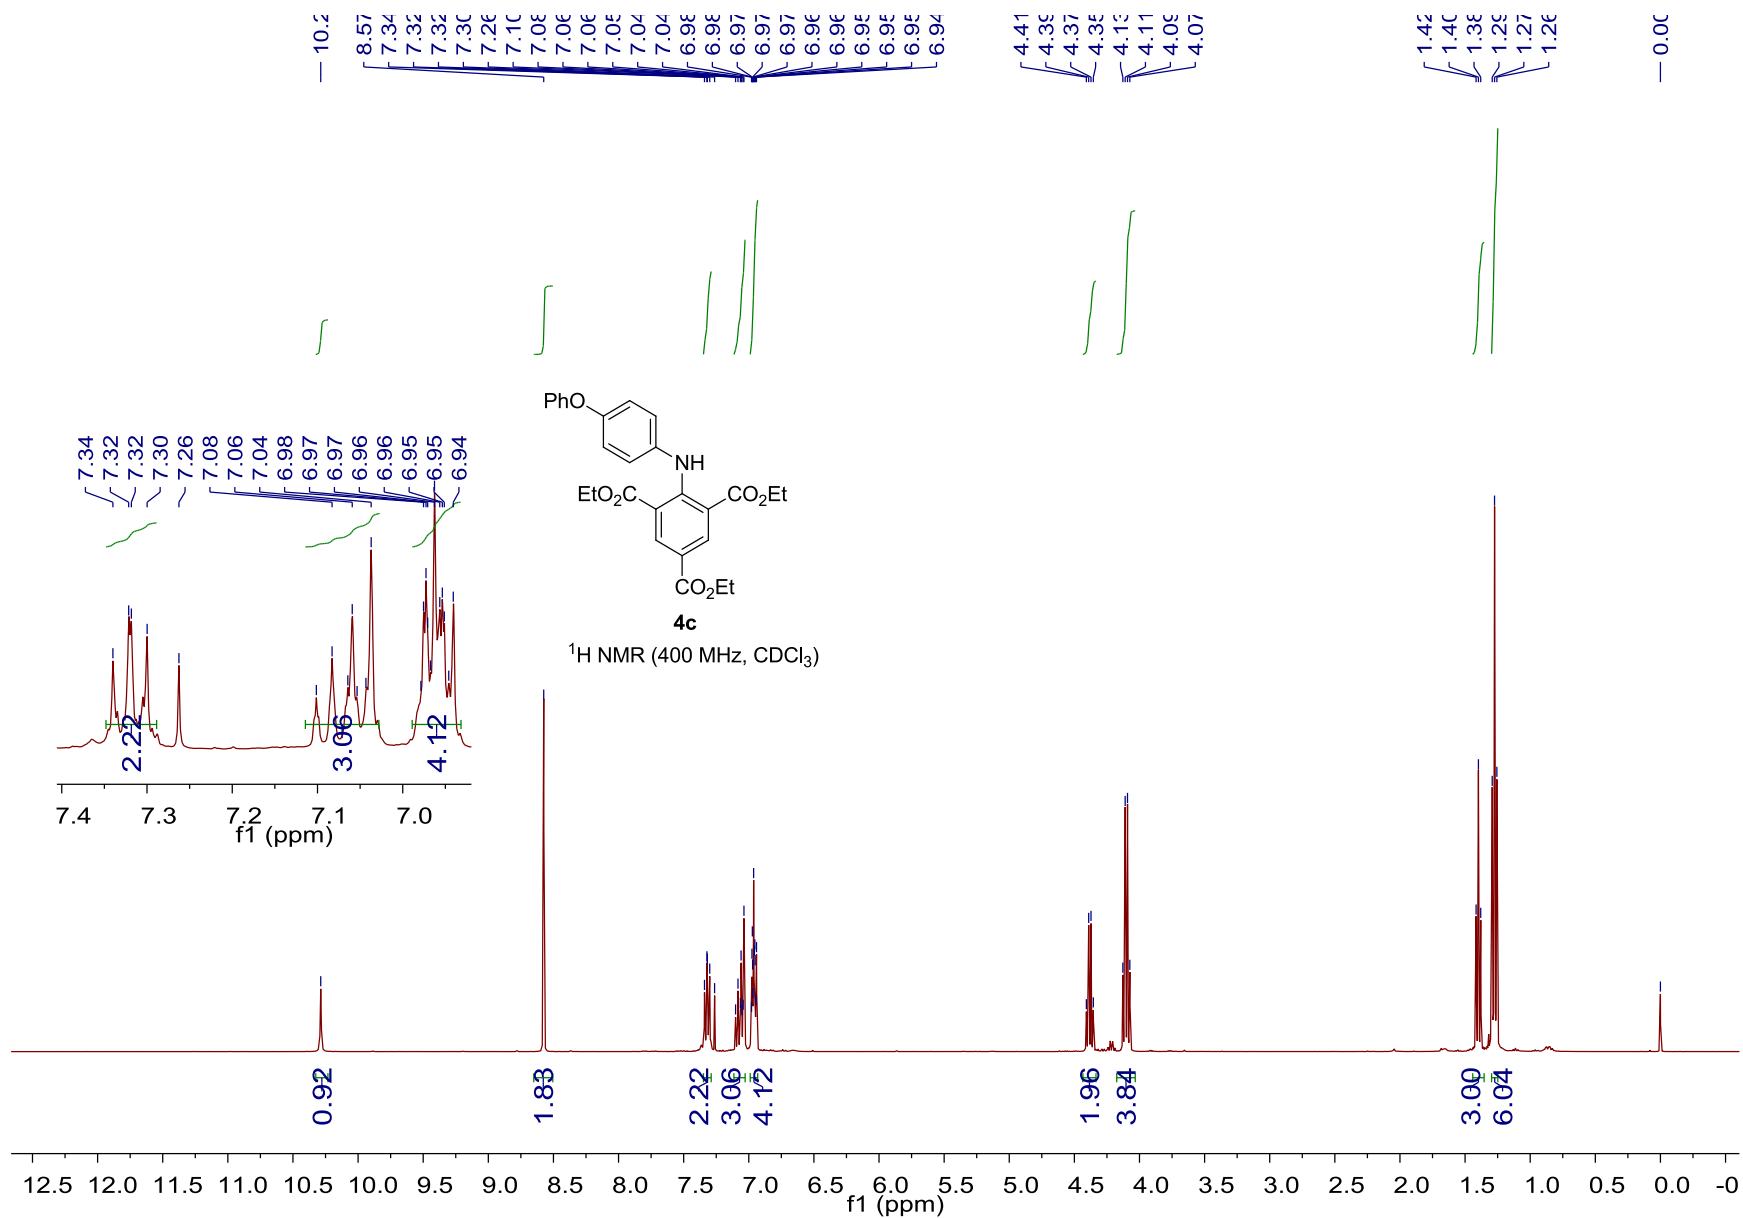

167.3  
165.3

157.3  
153.3  
149.3

137.3  
137.1

129.1  
123.1  
121.1  
120.1  
119.1  
118.1  
117.1

77.3  
77.0  
76.6

61.3  
60.9

14.3  
14.0

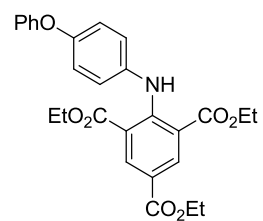

**4c**

<sup>13</sup>C NMR (100 MHz, CDCl<sub>3</sub>)

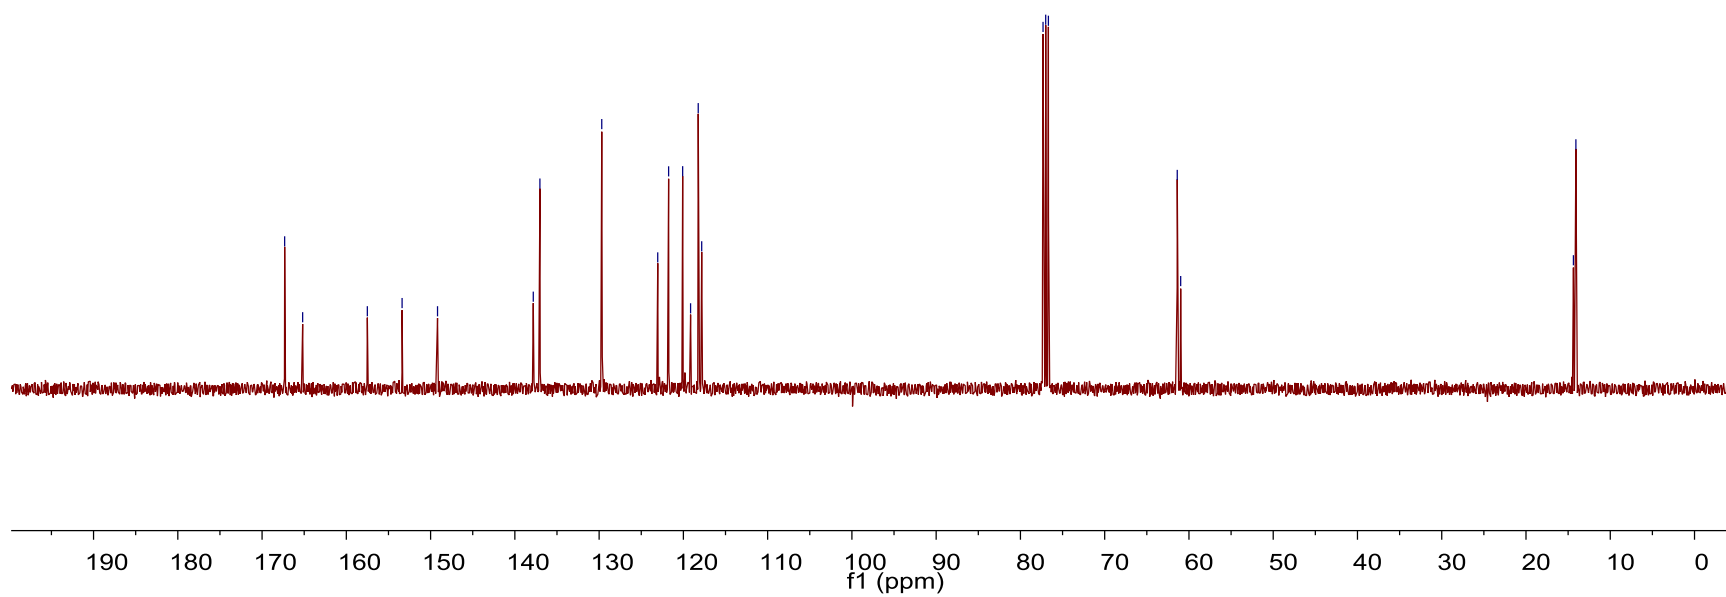

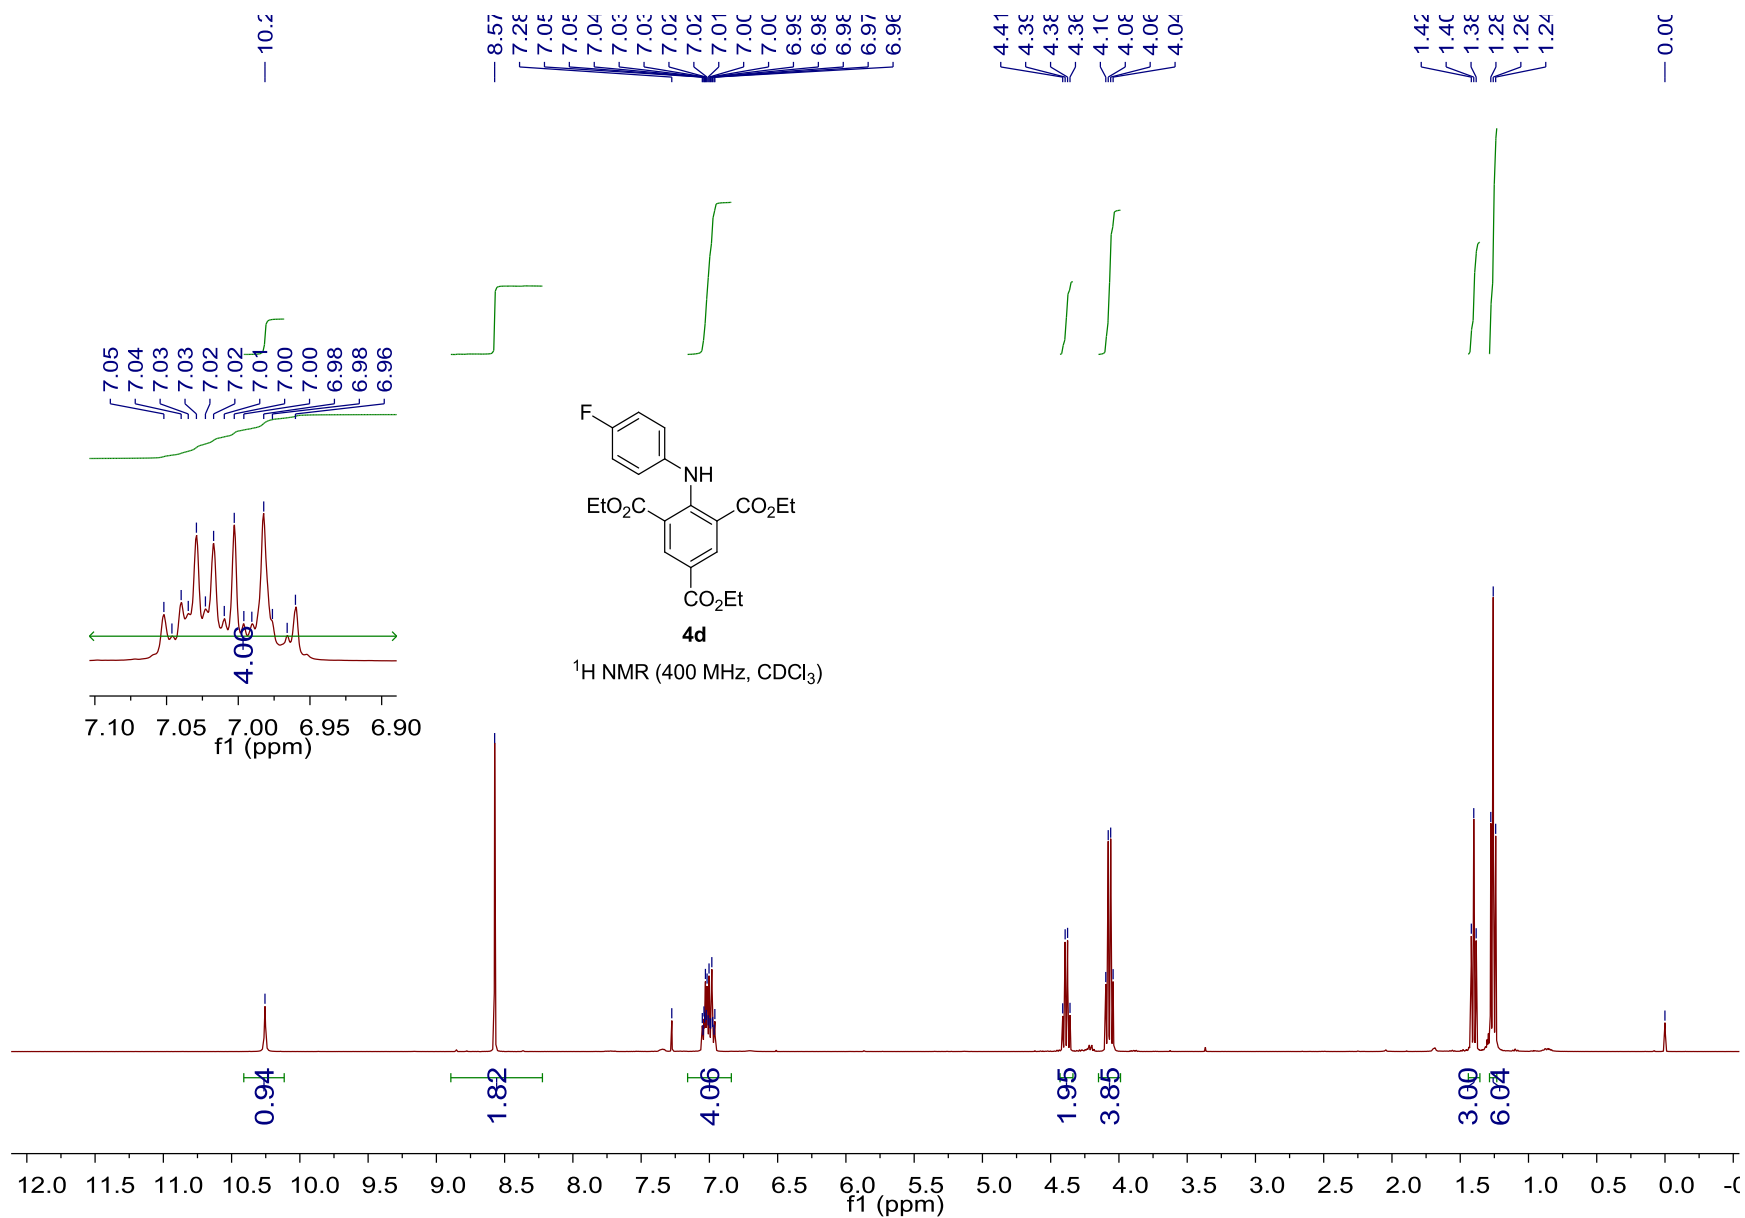

167.1  
165.1  
160.1  
158.1

149.1

138.1  
138.1  
137.1

122.1  
121.1  
119.1  
117.1  
116.1  
115.1

77.3  
77.0  
76.6

61.4  
61.0

14.3  
14.0

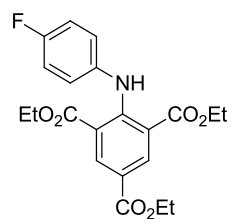

**4d**

<sup>13</sup>C NMR (100 MHz, CDCl<sub>3</sub>)

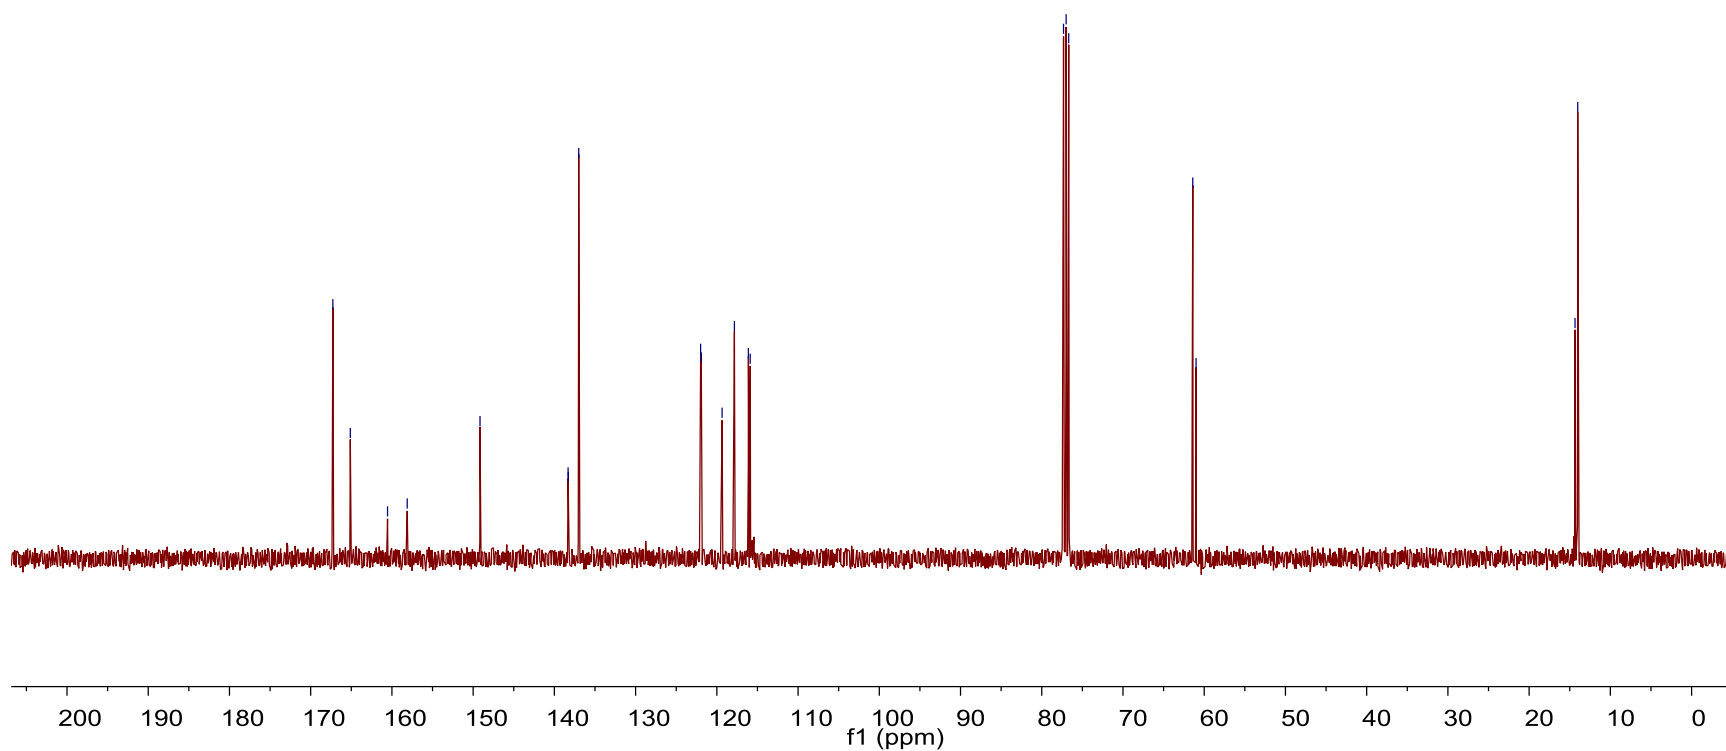

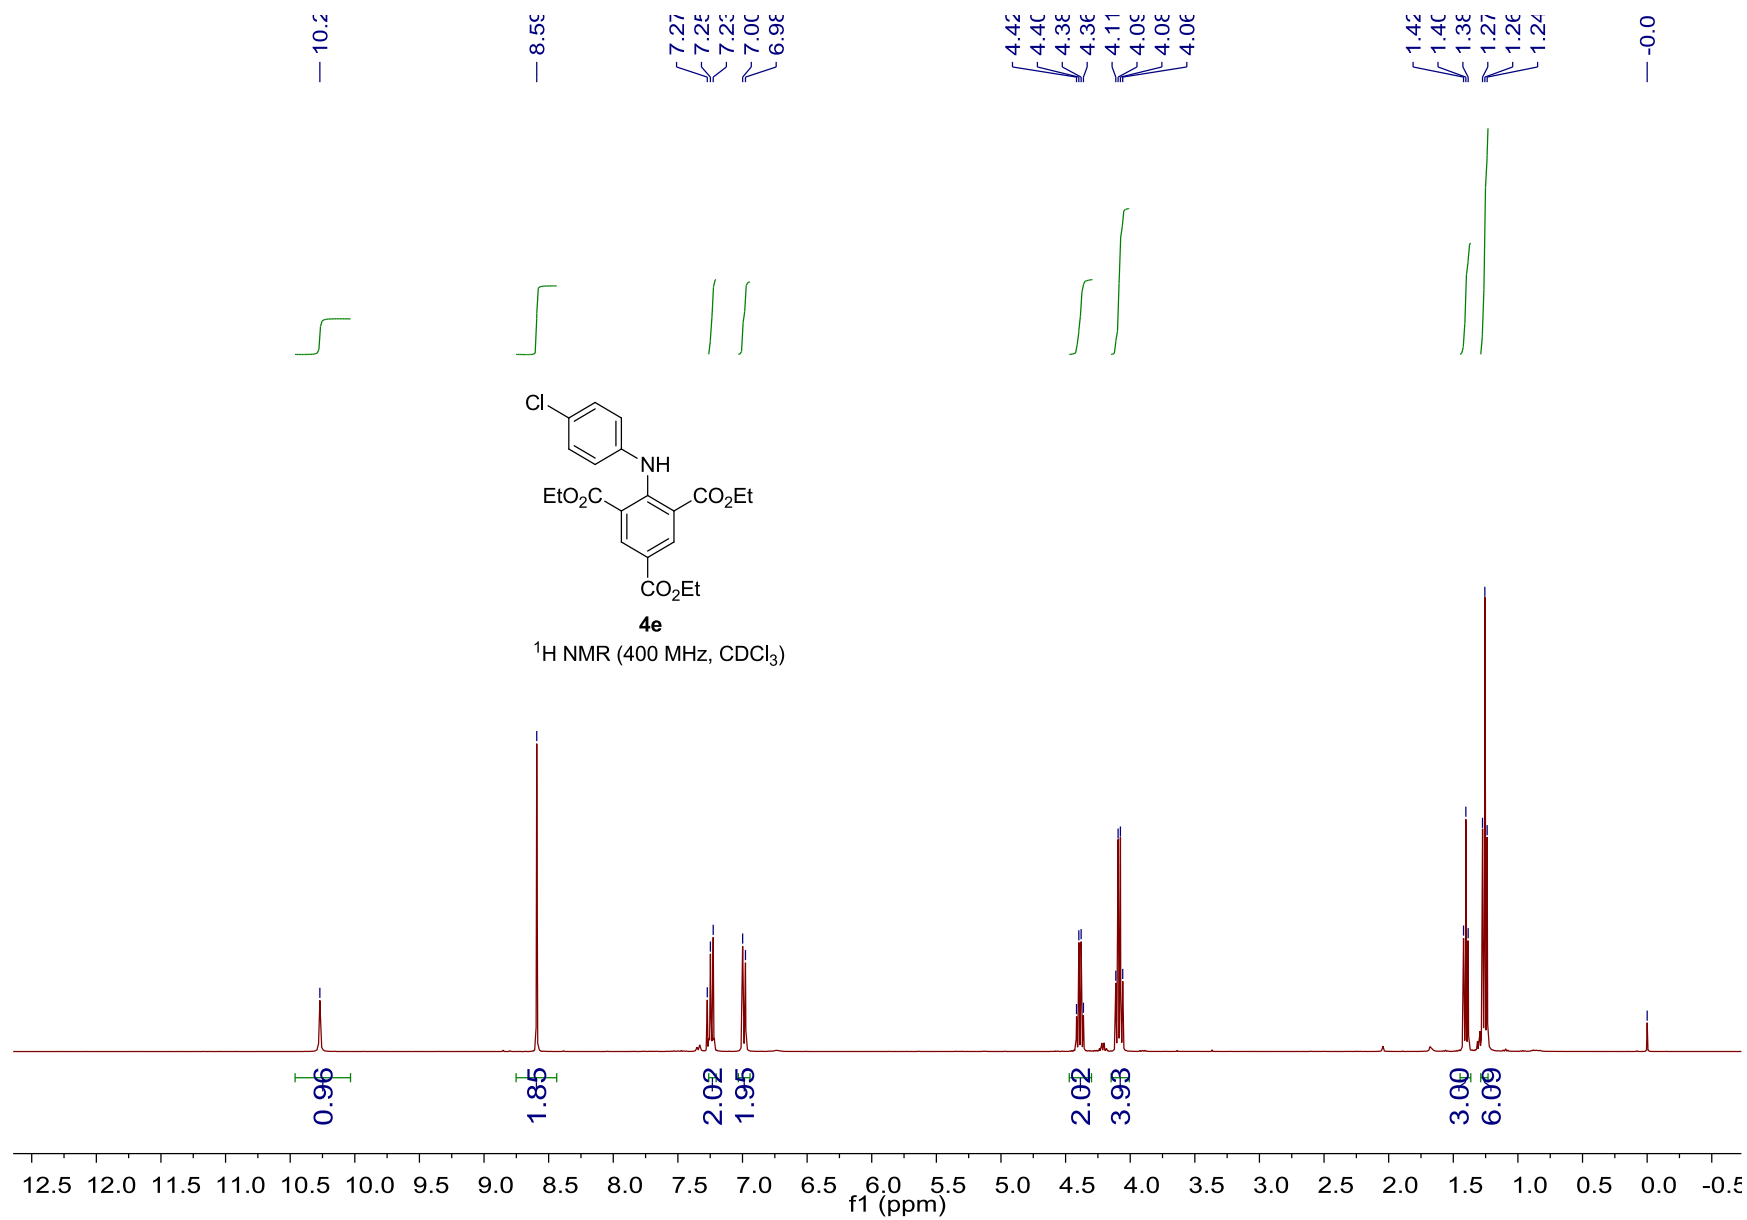

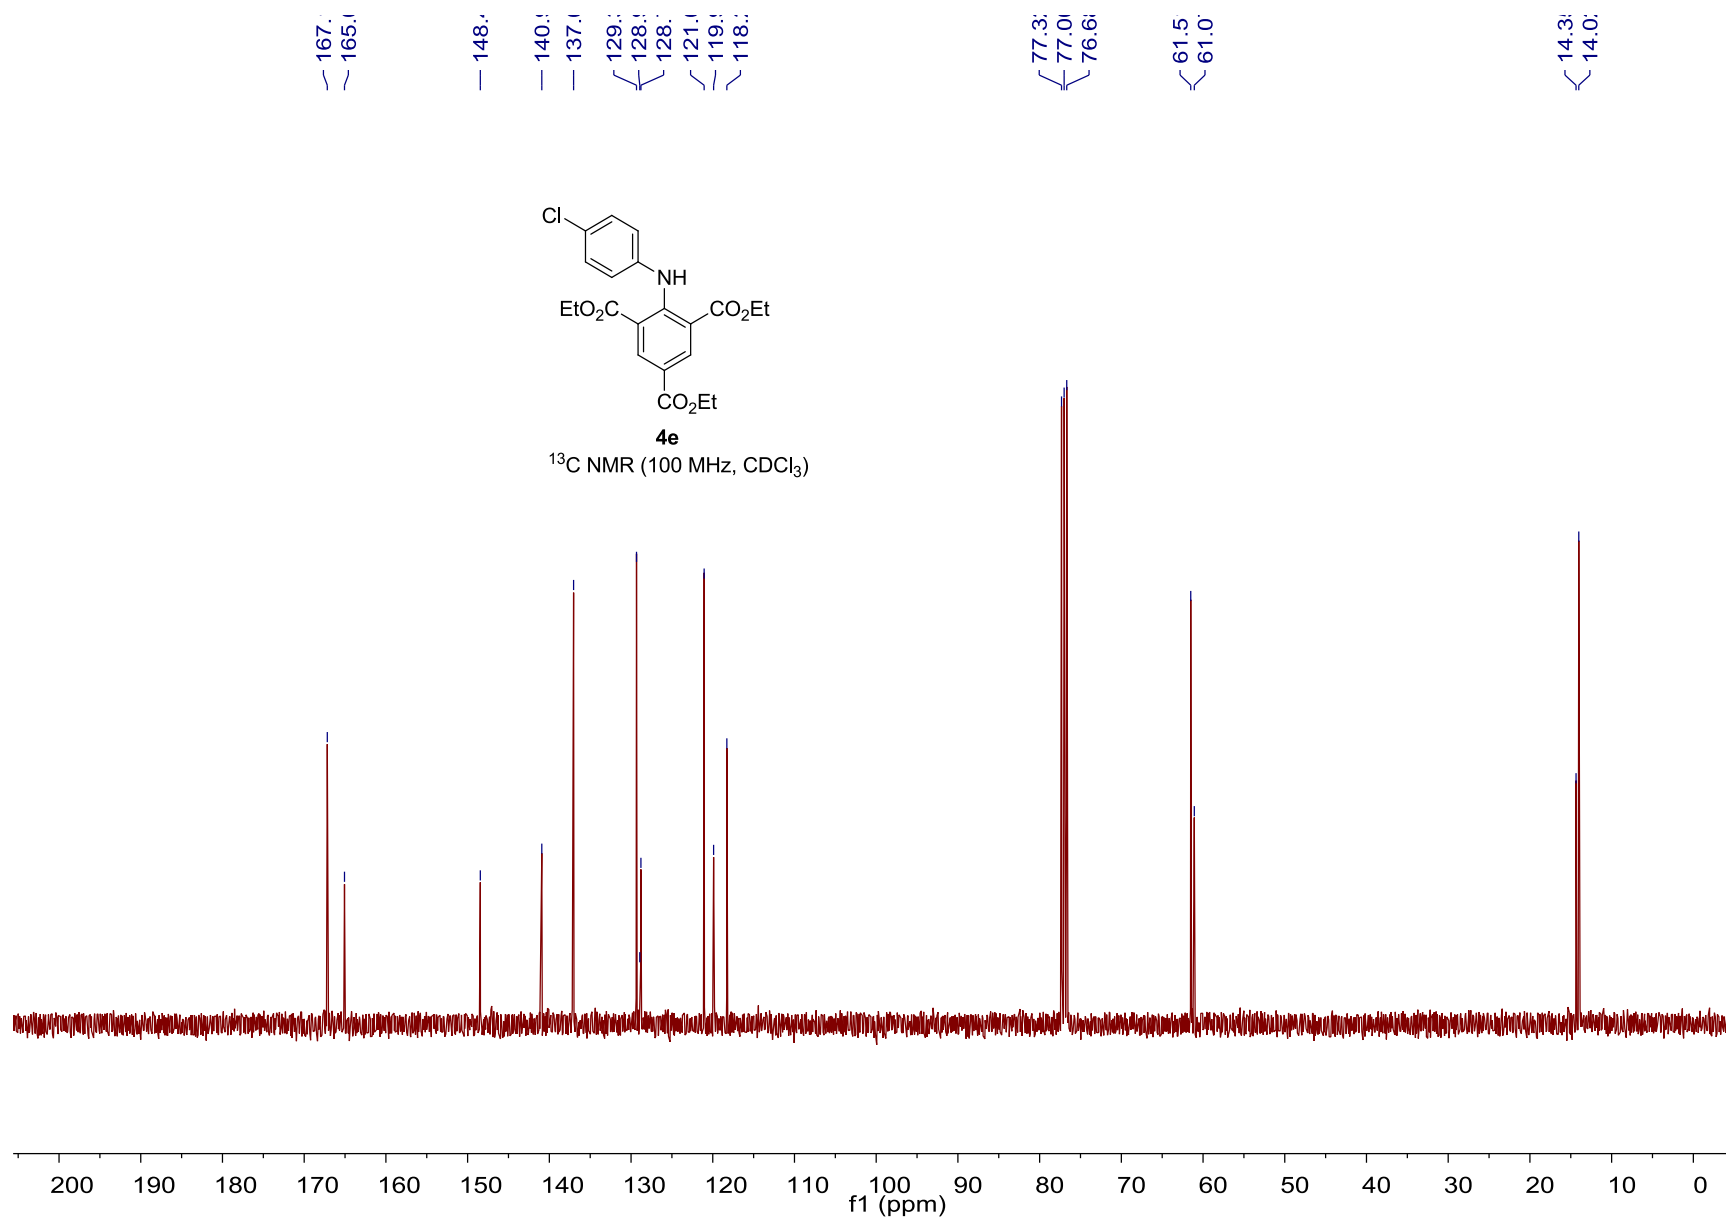

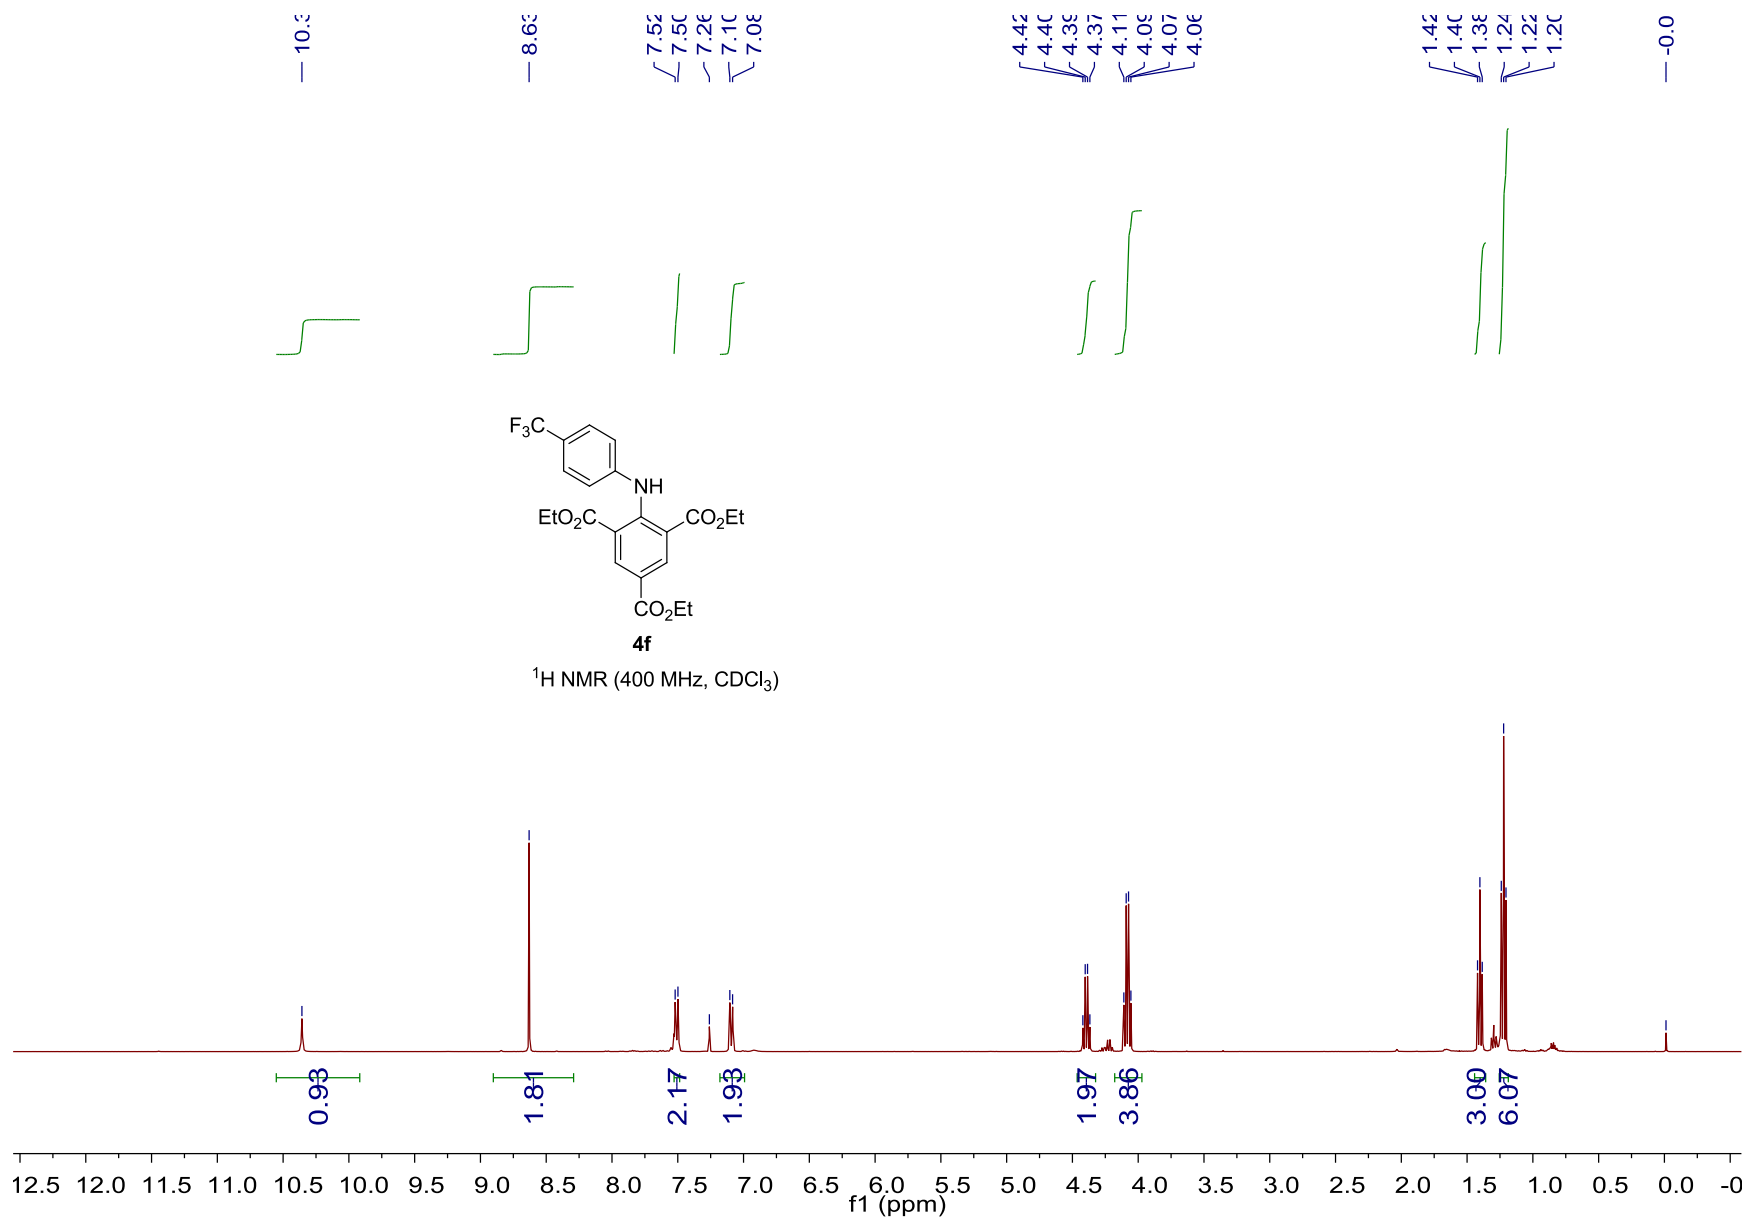

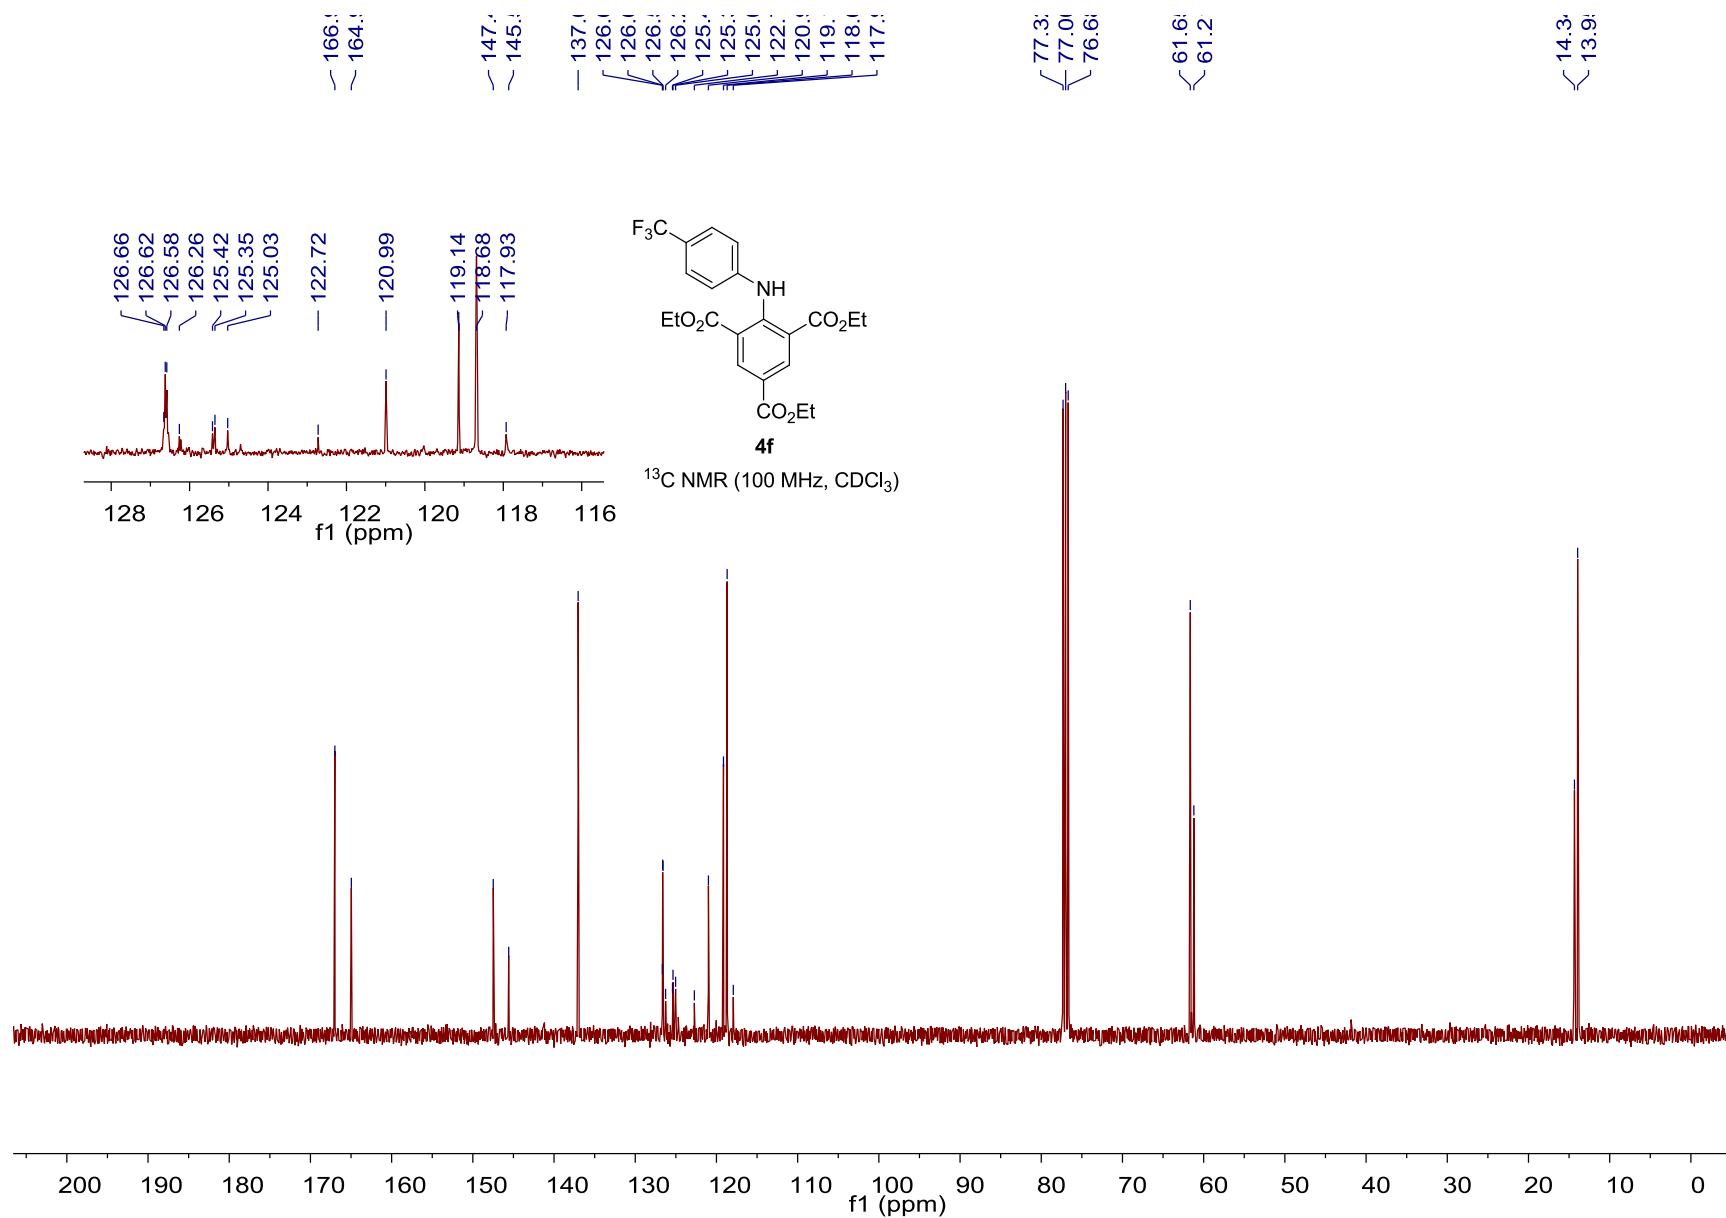

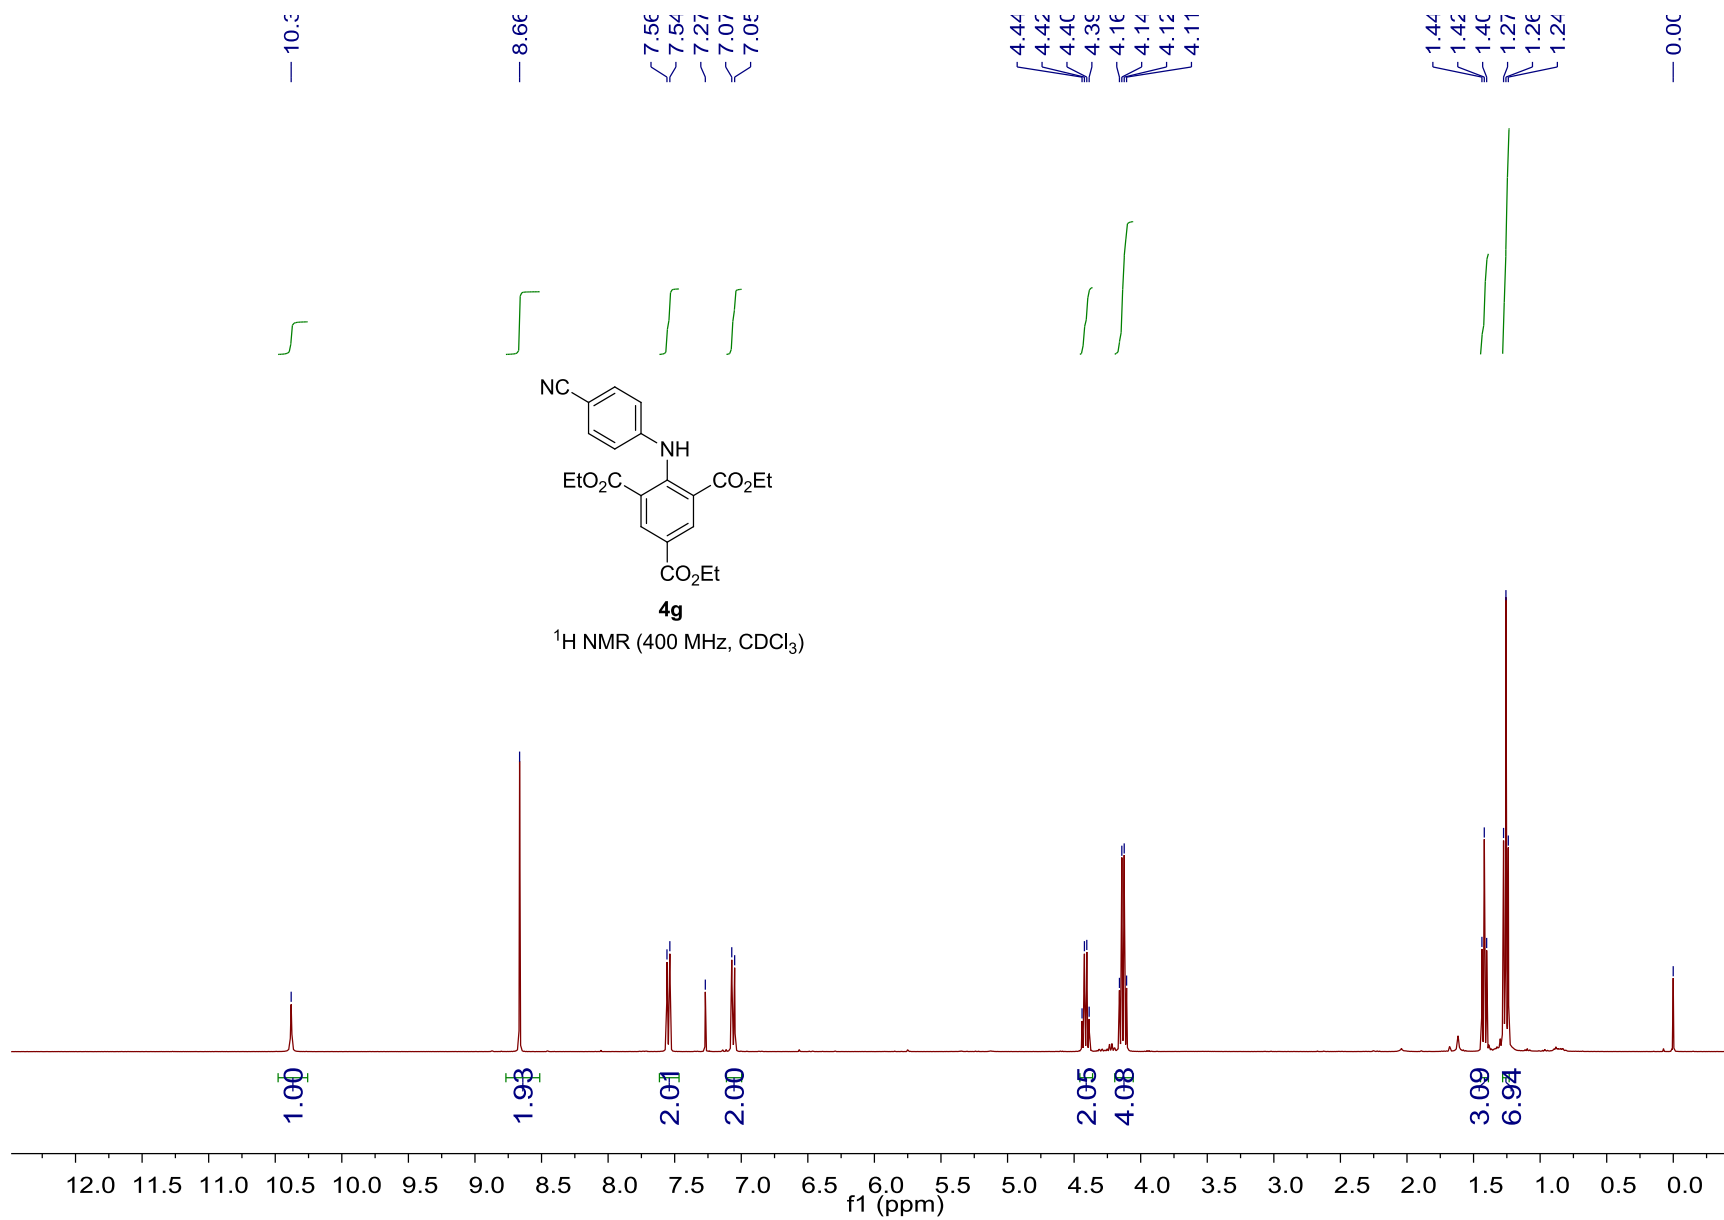

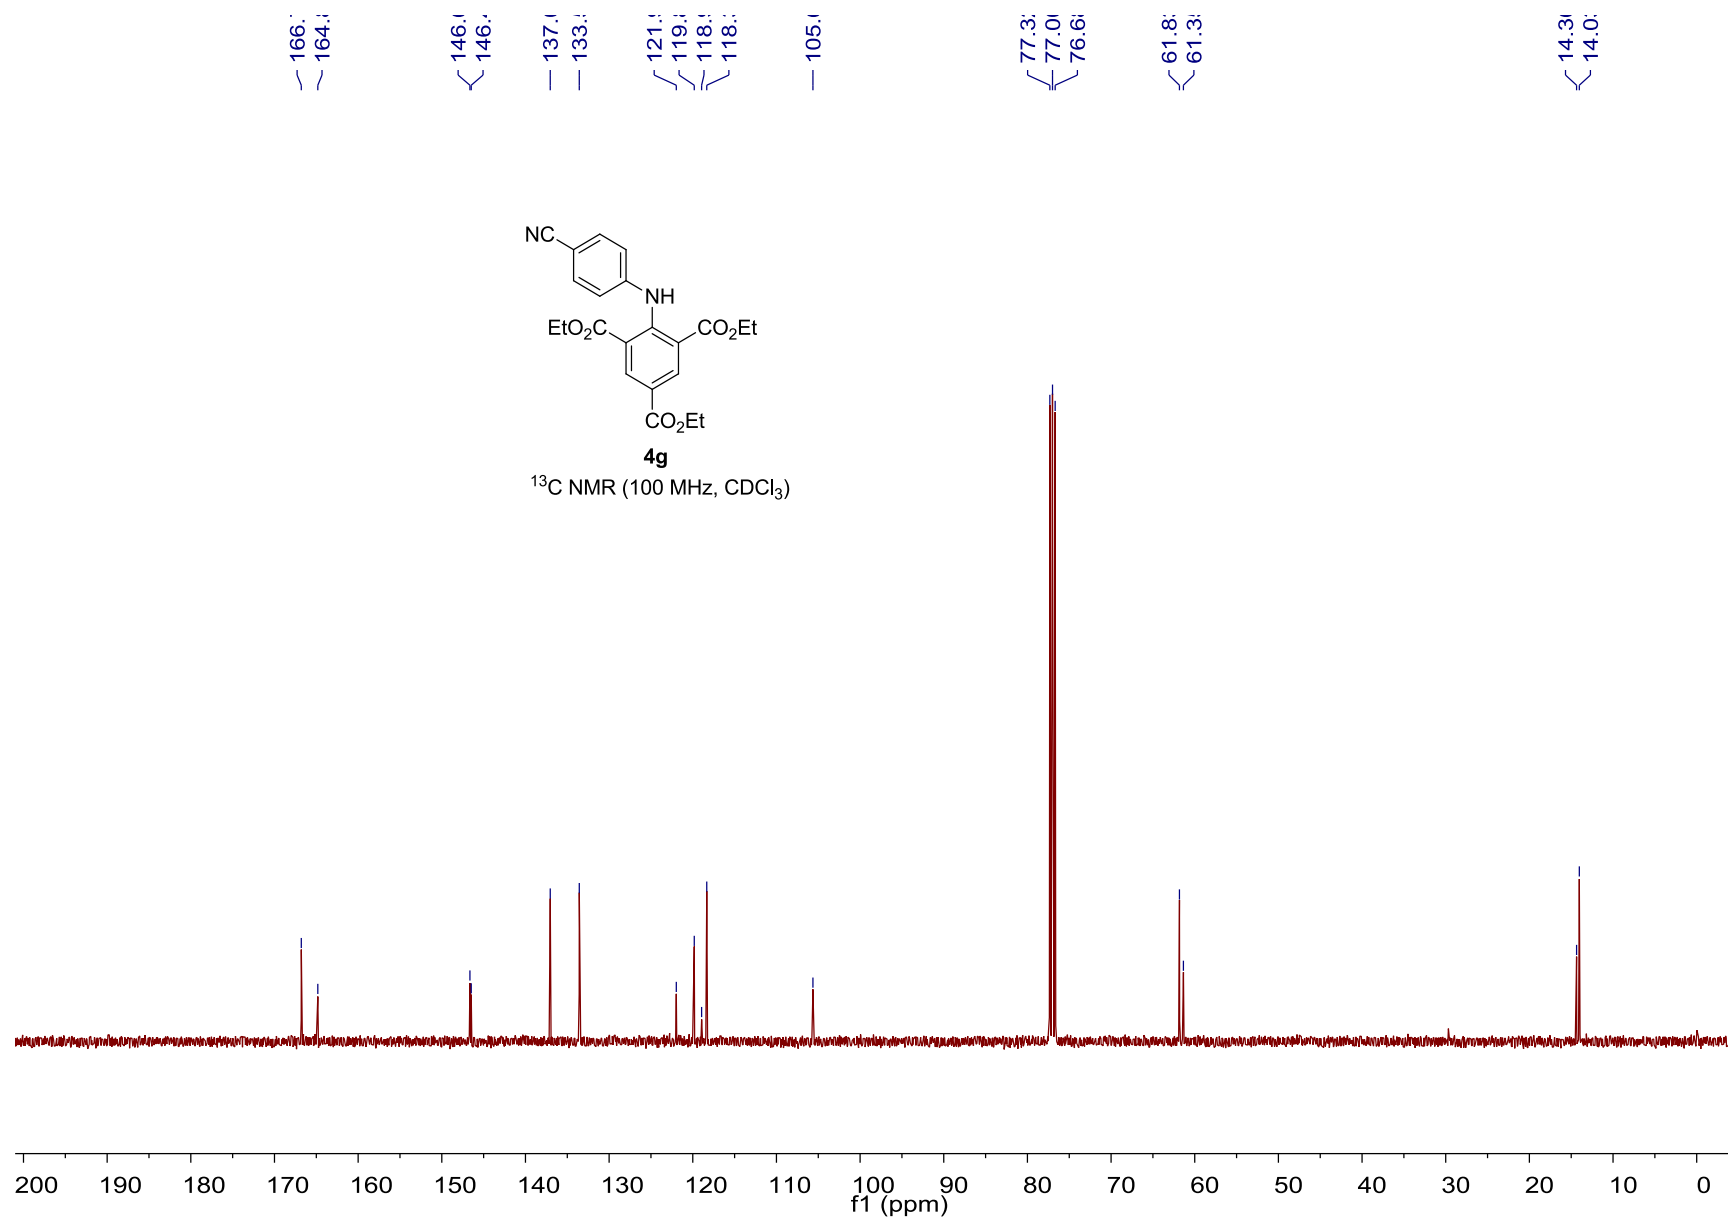

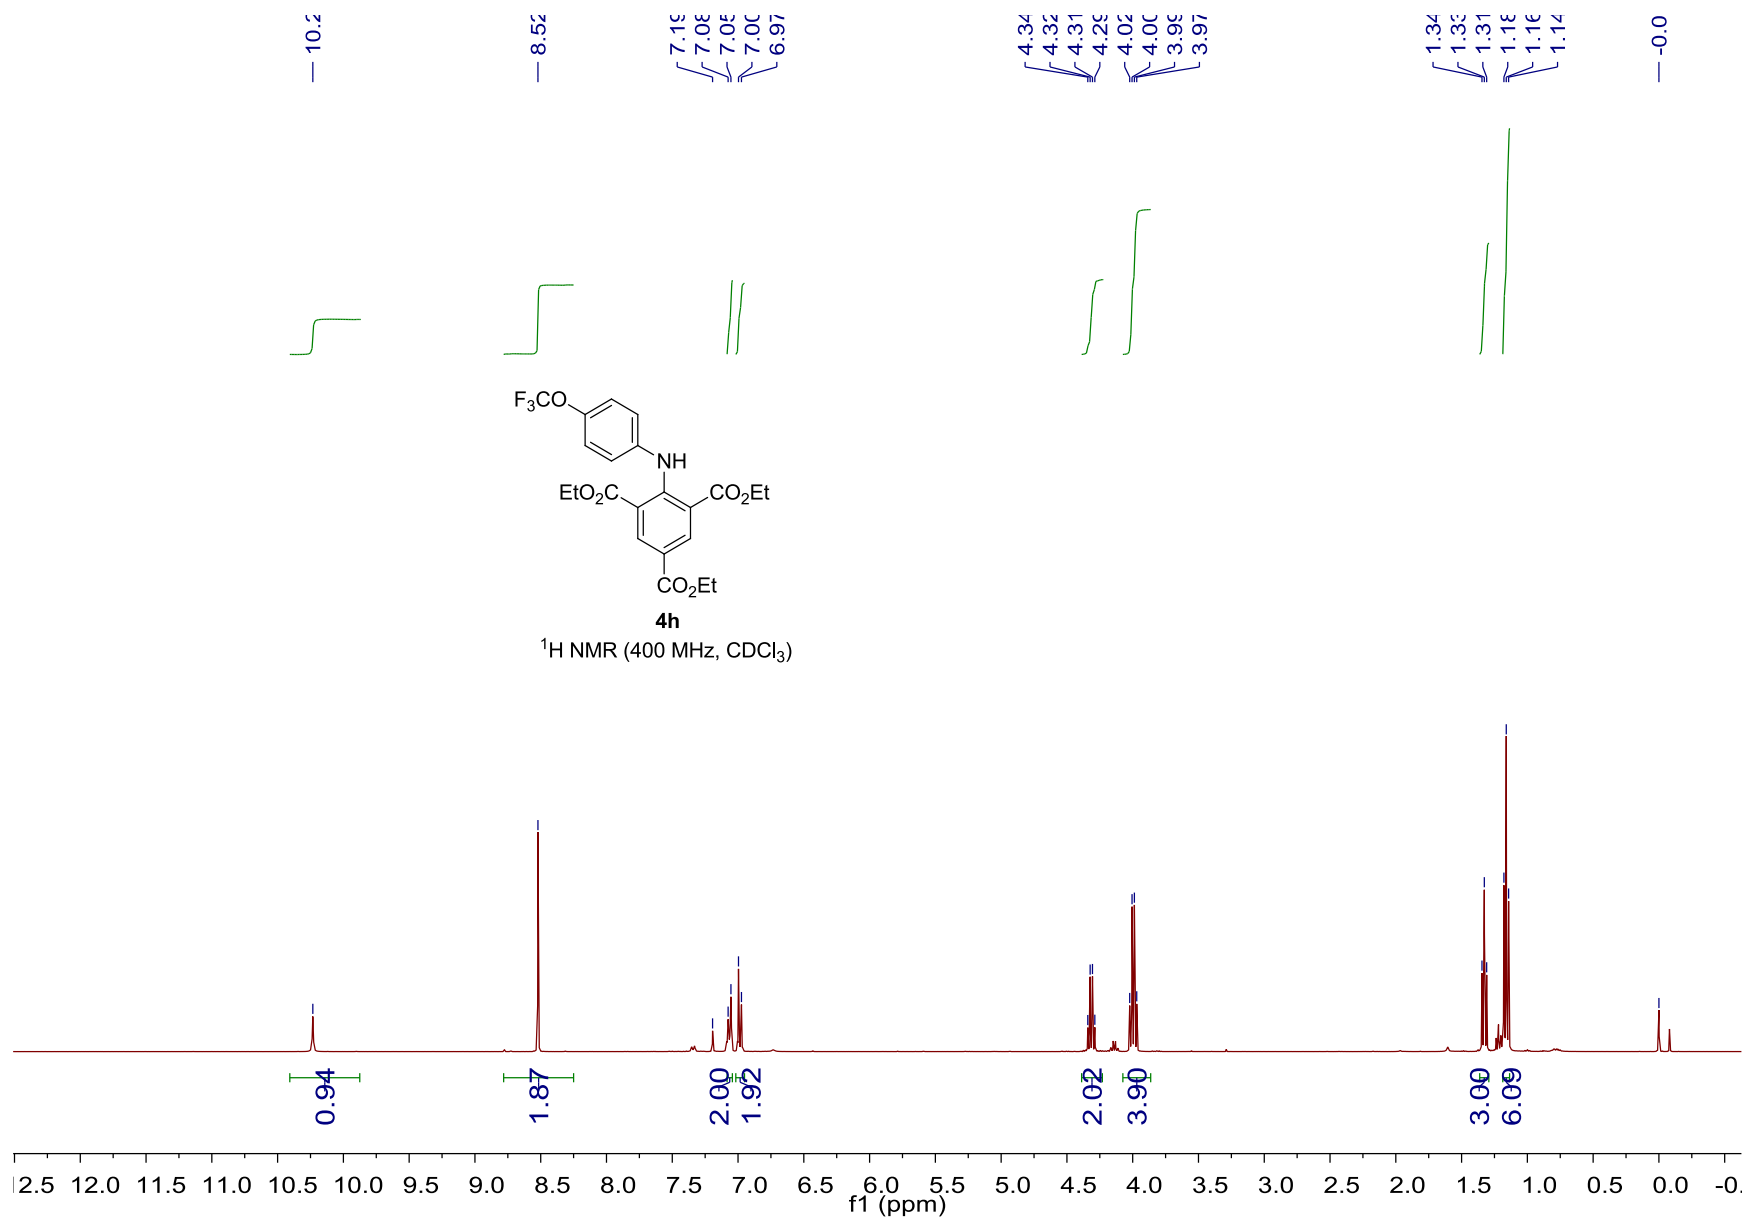

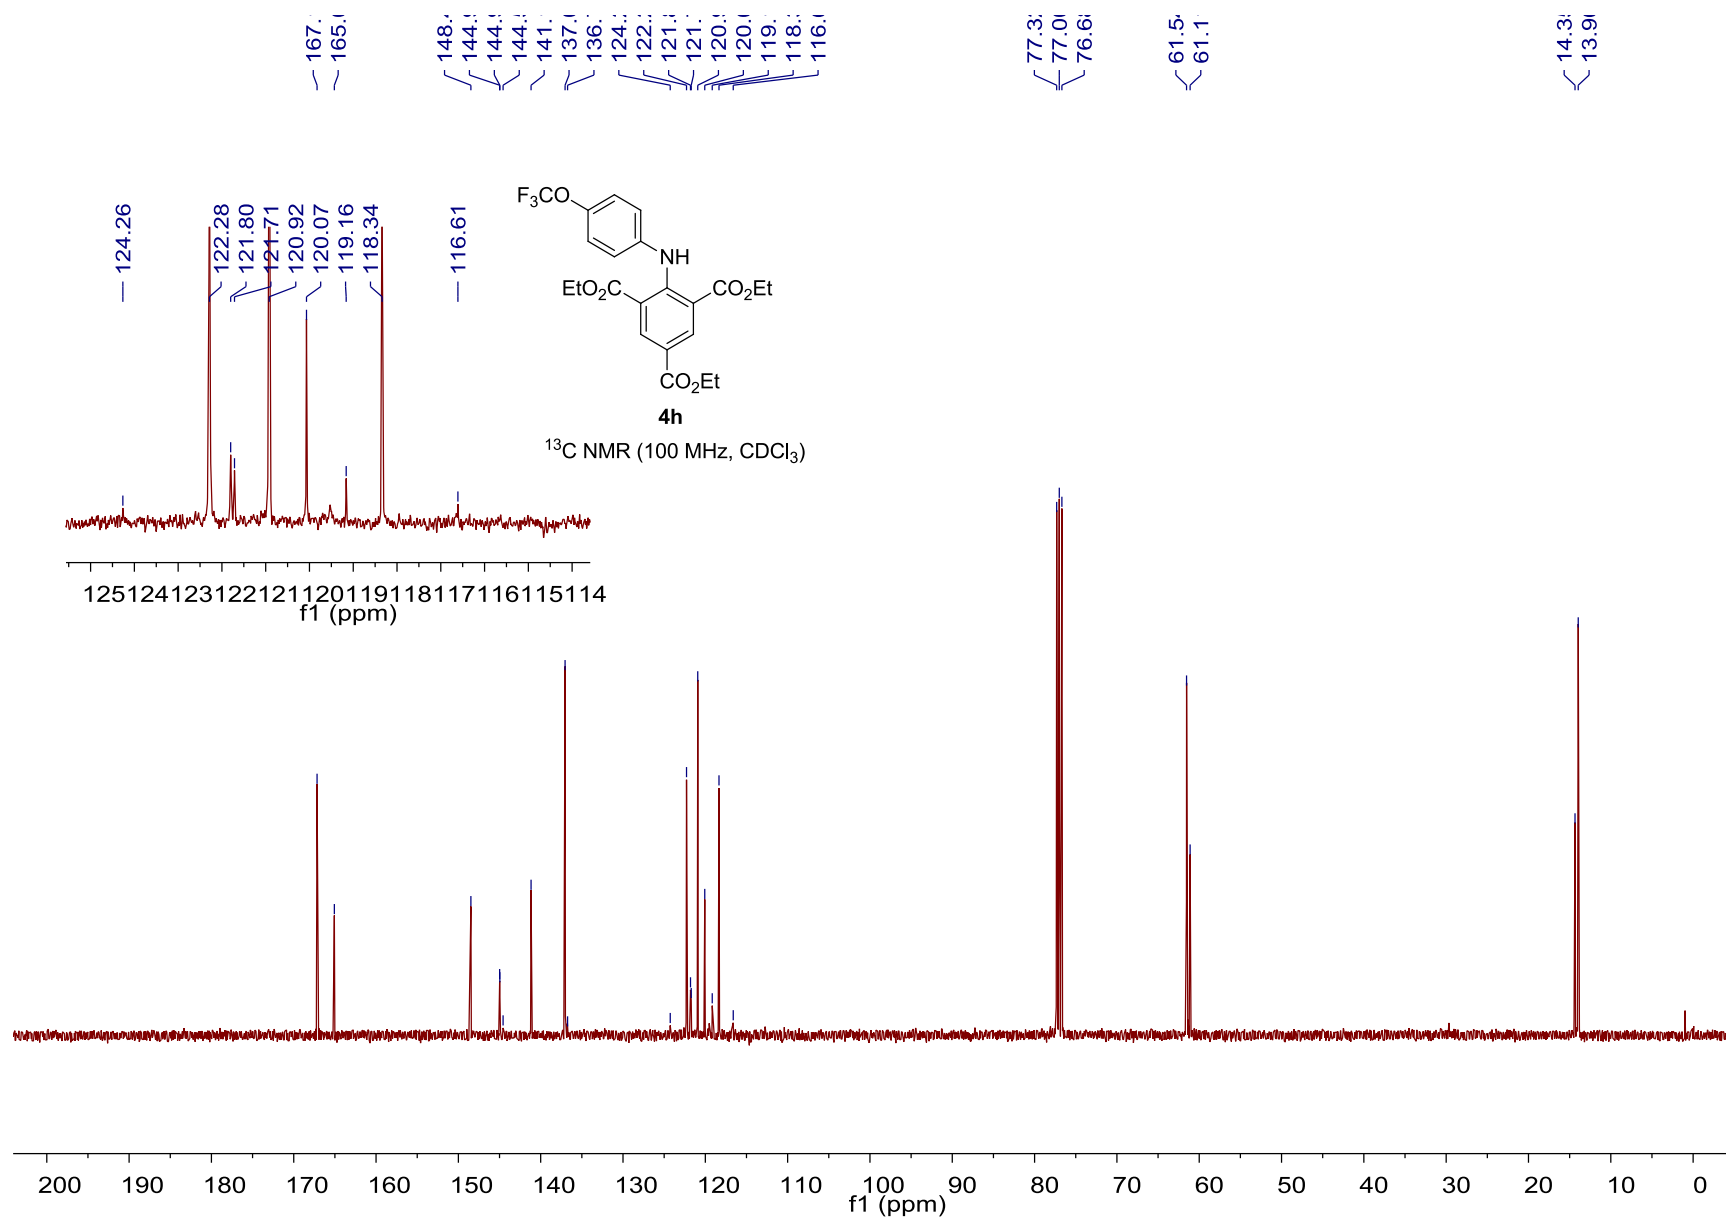

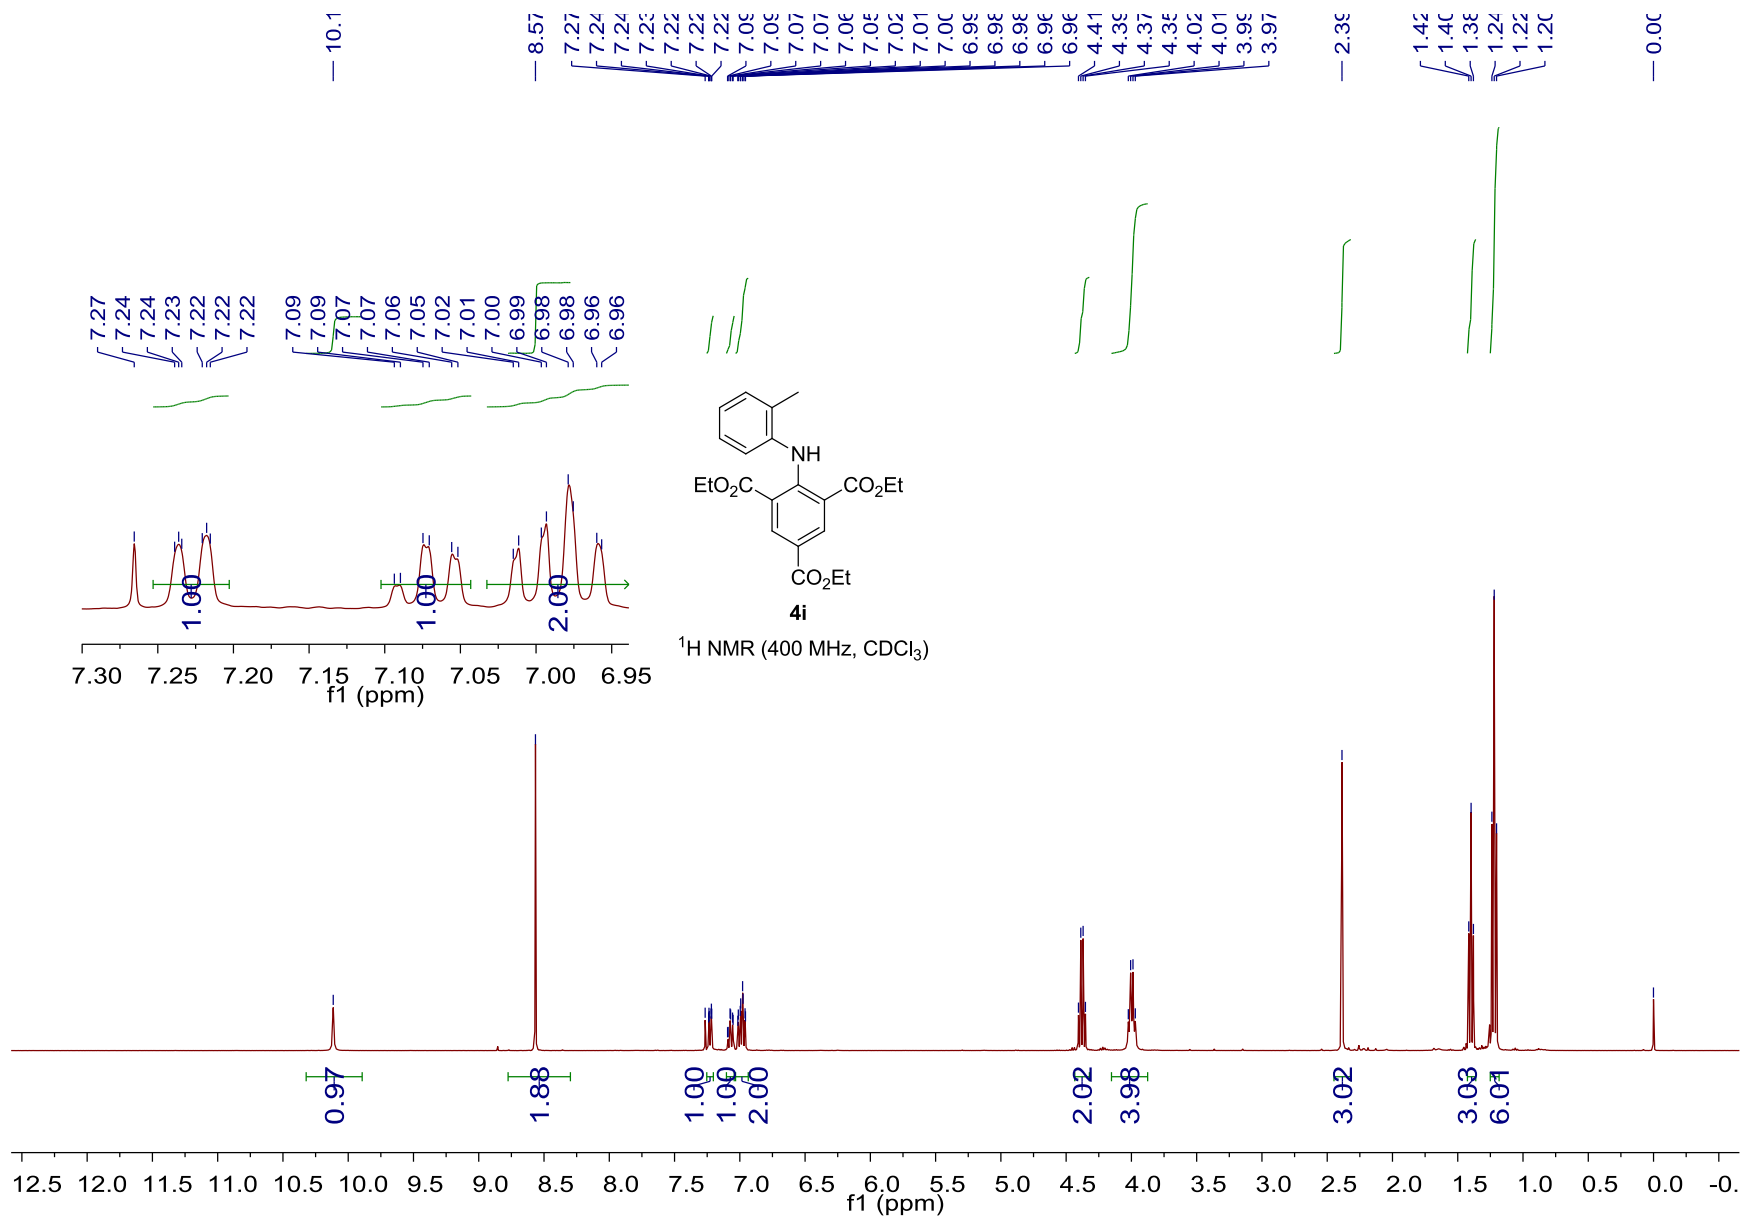

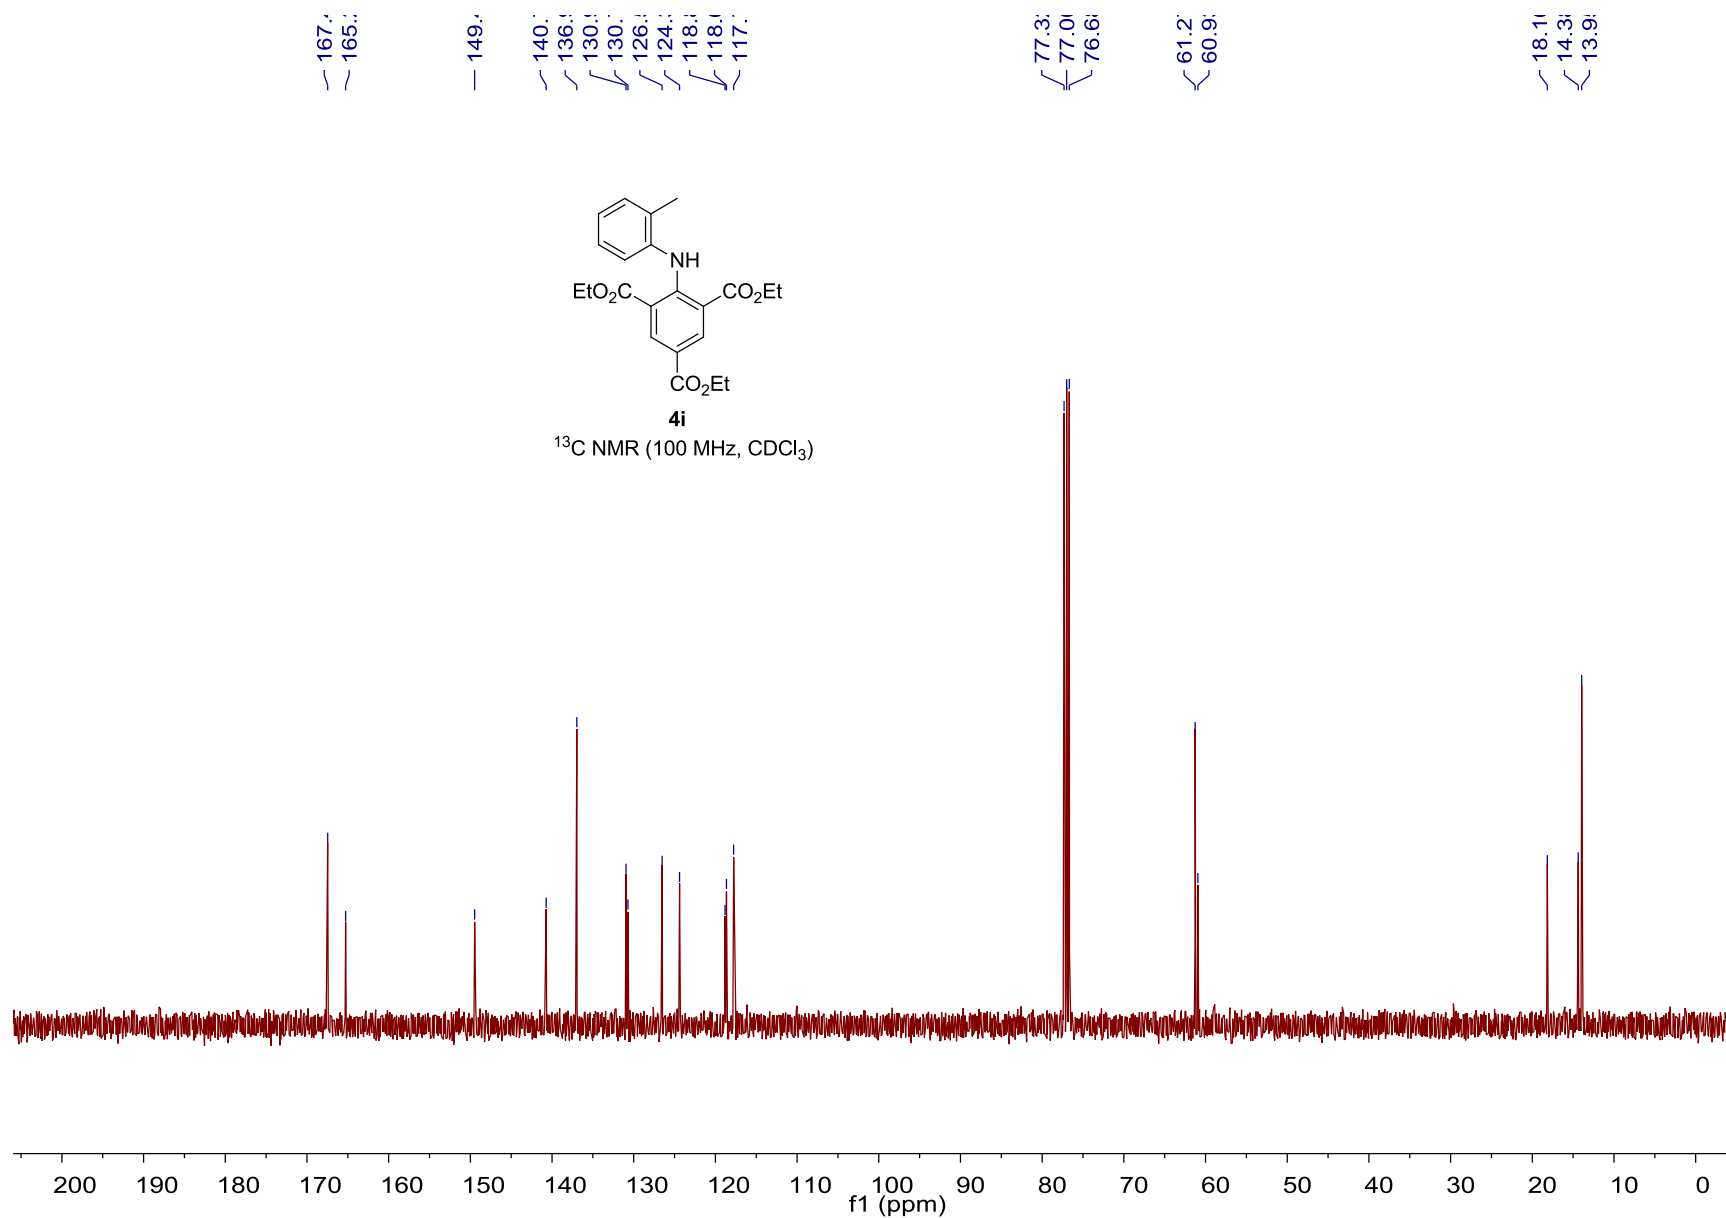

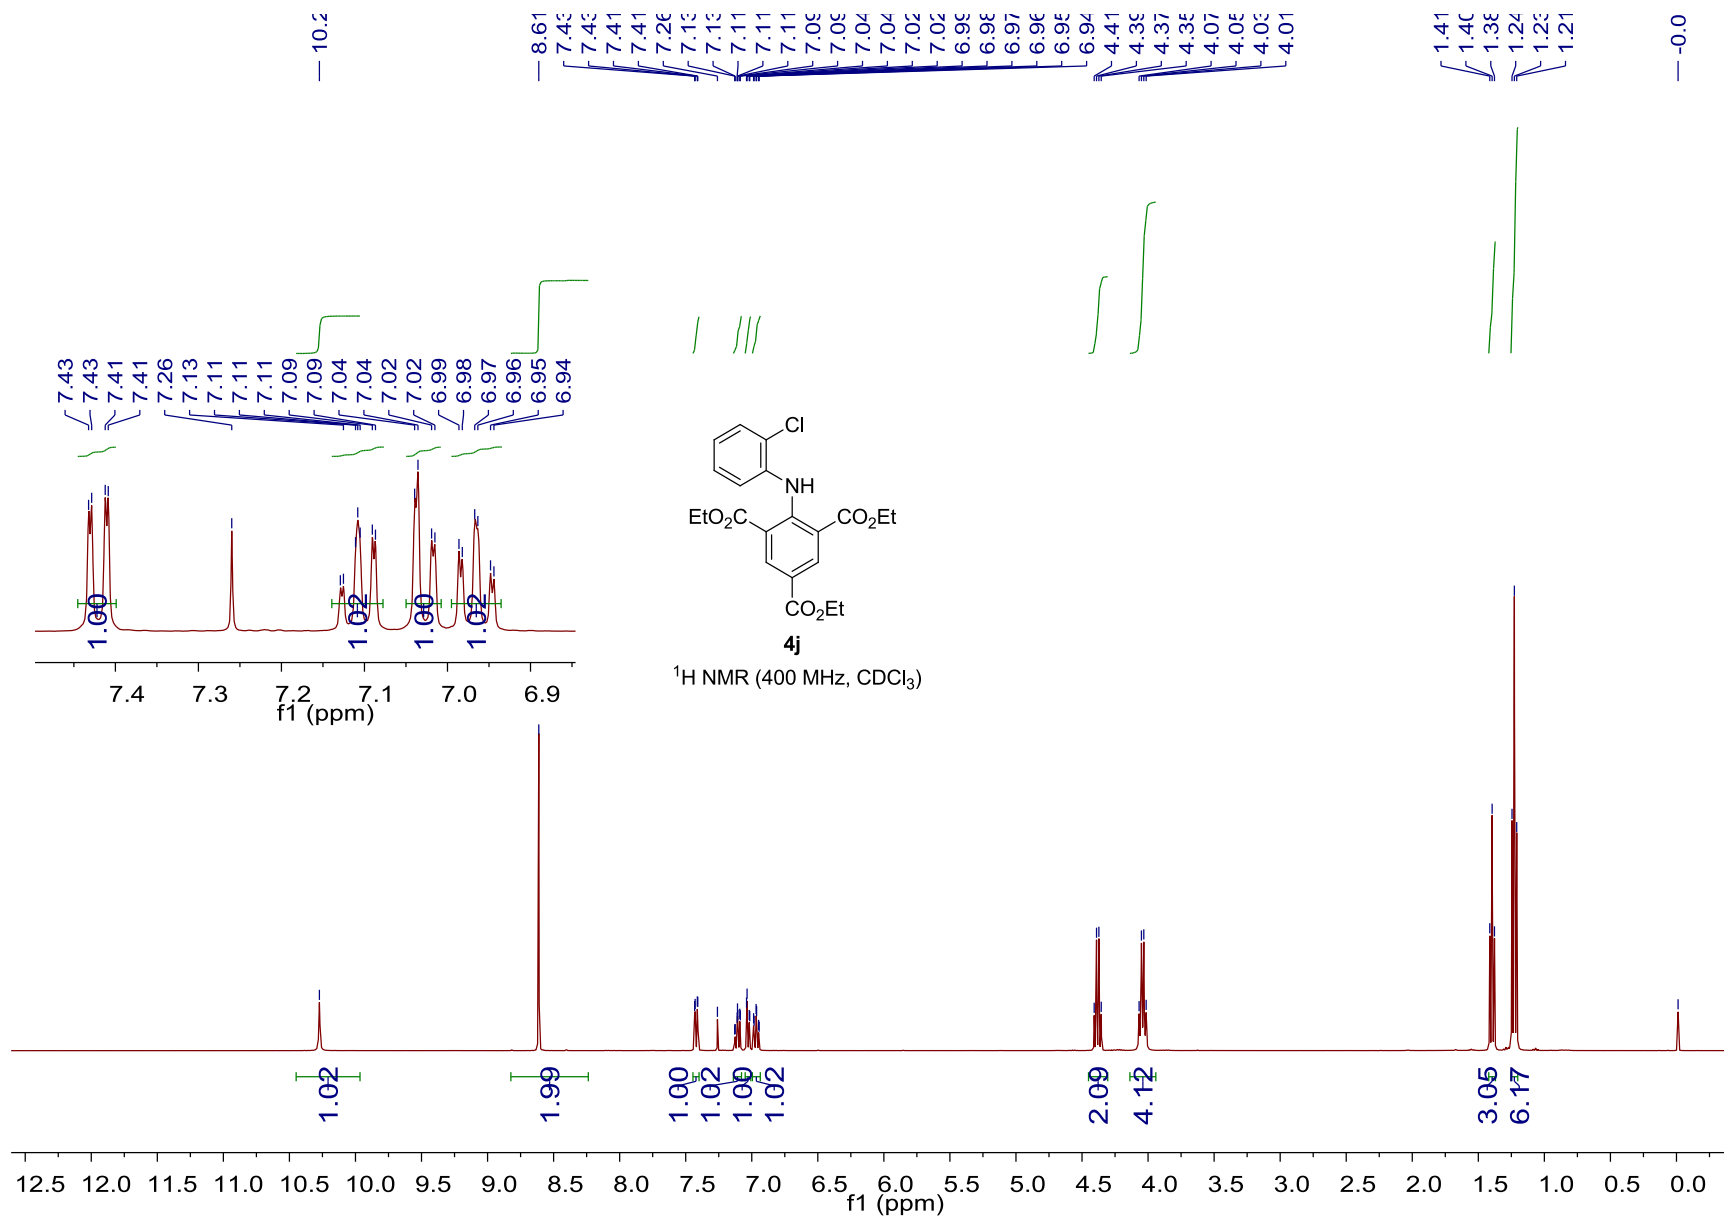

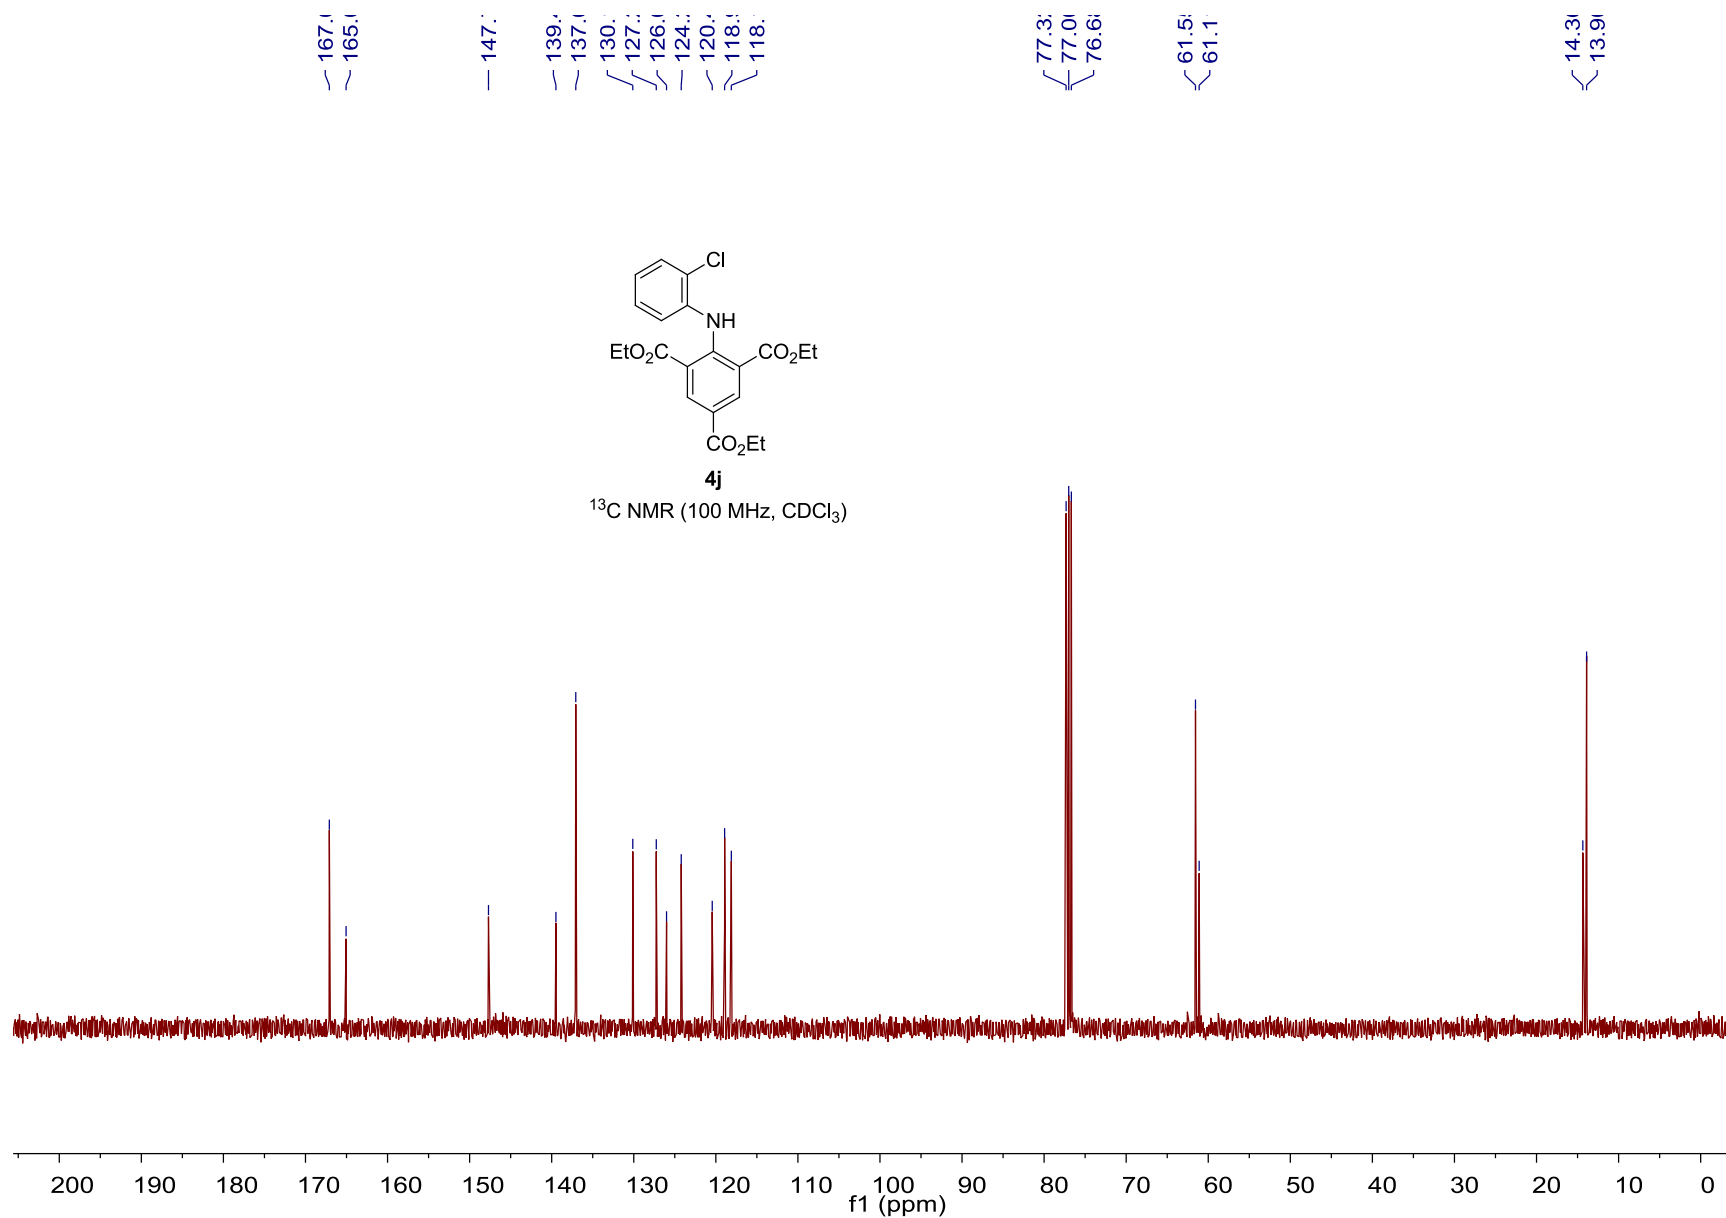

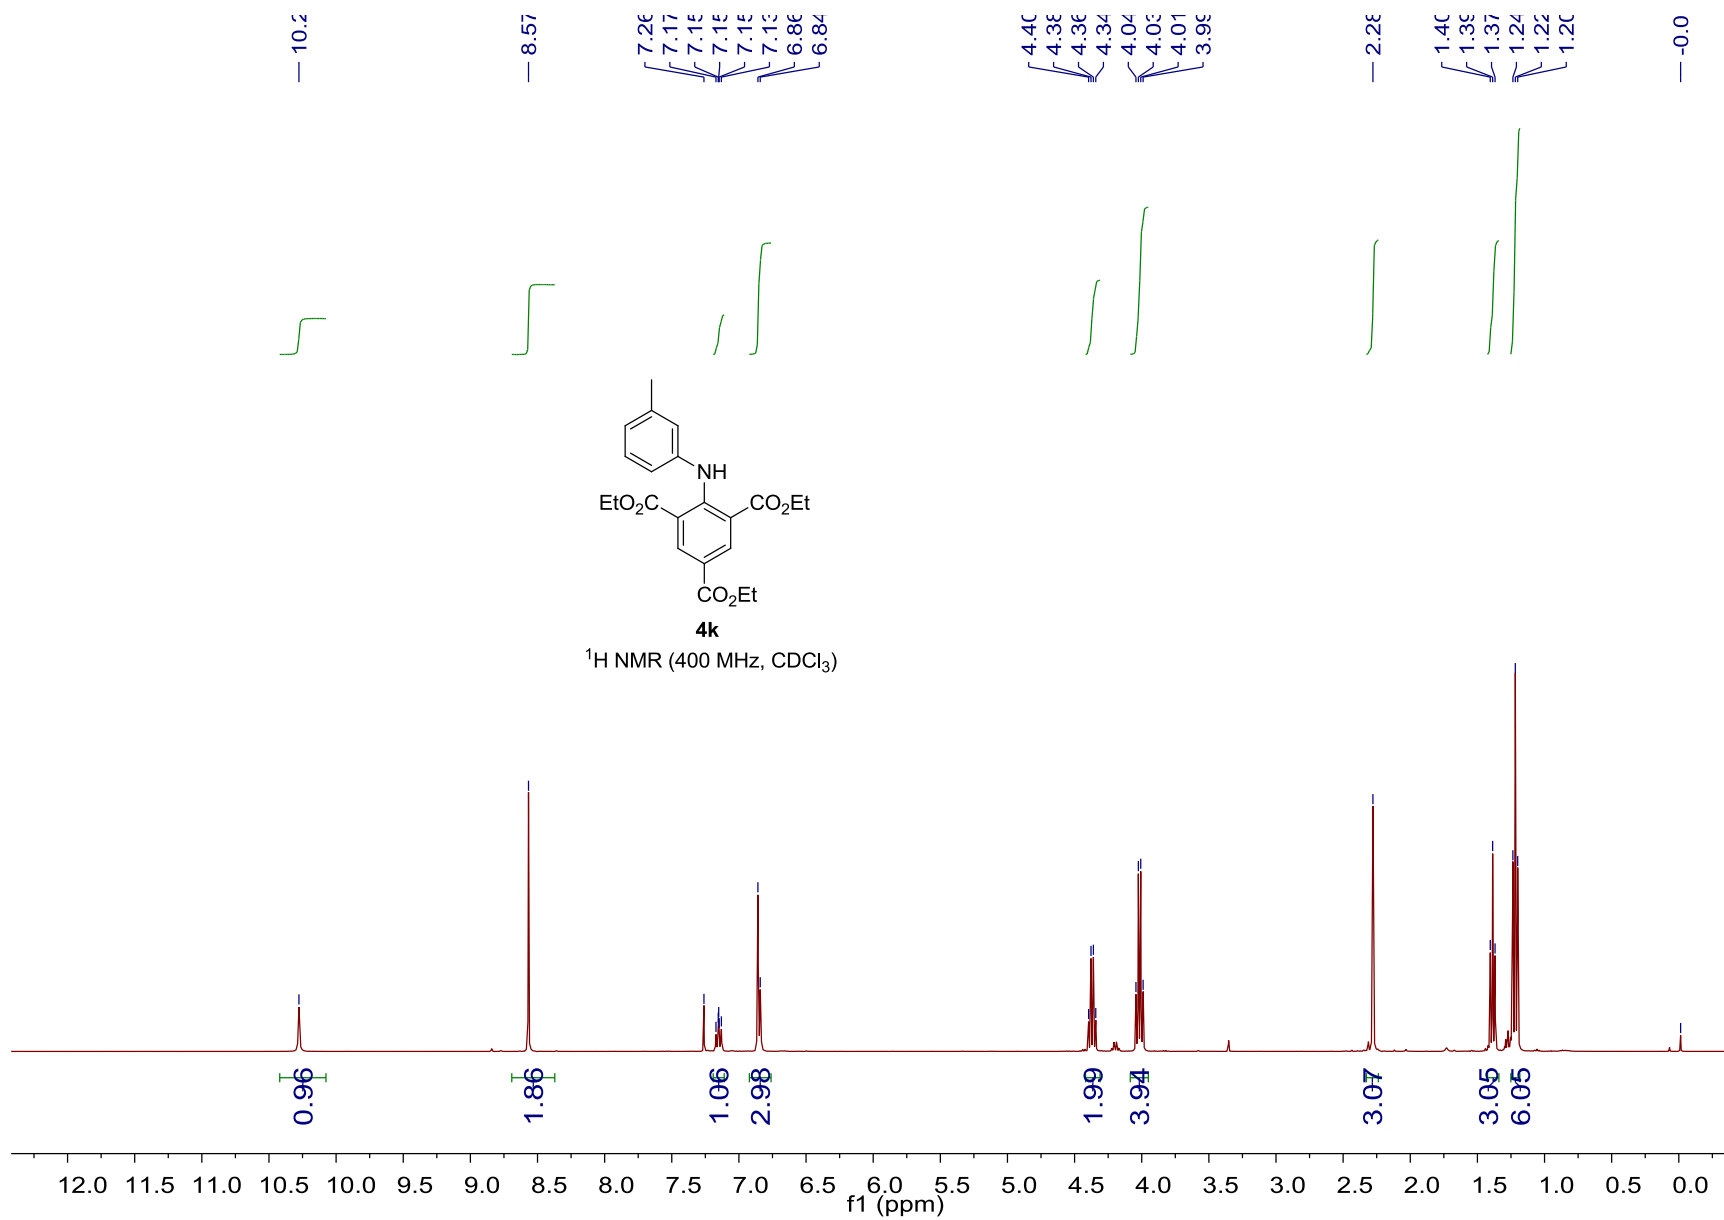

~ 167.1  
~ 165.1

~ 148.1

~ 141.1

~ 139.1

~ 136.1

~ 129.1

~ 124.1

~ 120.1

~ 119.1

~ 118.1

~ 116.1

~ 77.3;  
~ 77.0;  
~ 76.6;

~ 61.3;  
~ 60.9;

~ 21.2;  
~ 14.3;  
~ 13.9;

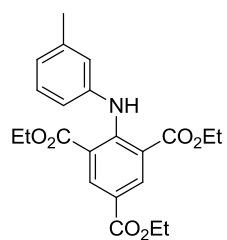

**4k**

<sup>13</sup>C NMR (100 MHz, CDCl<sub>3</sub>)

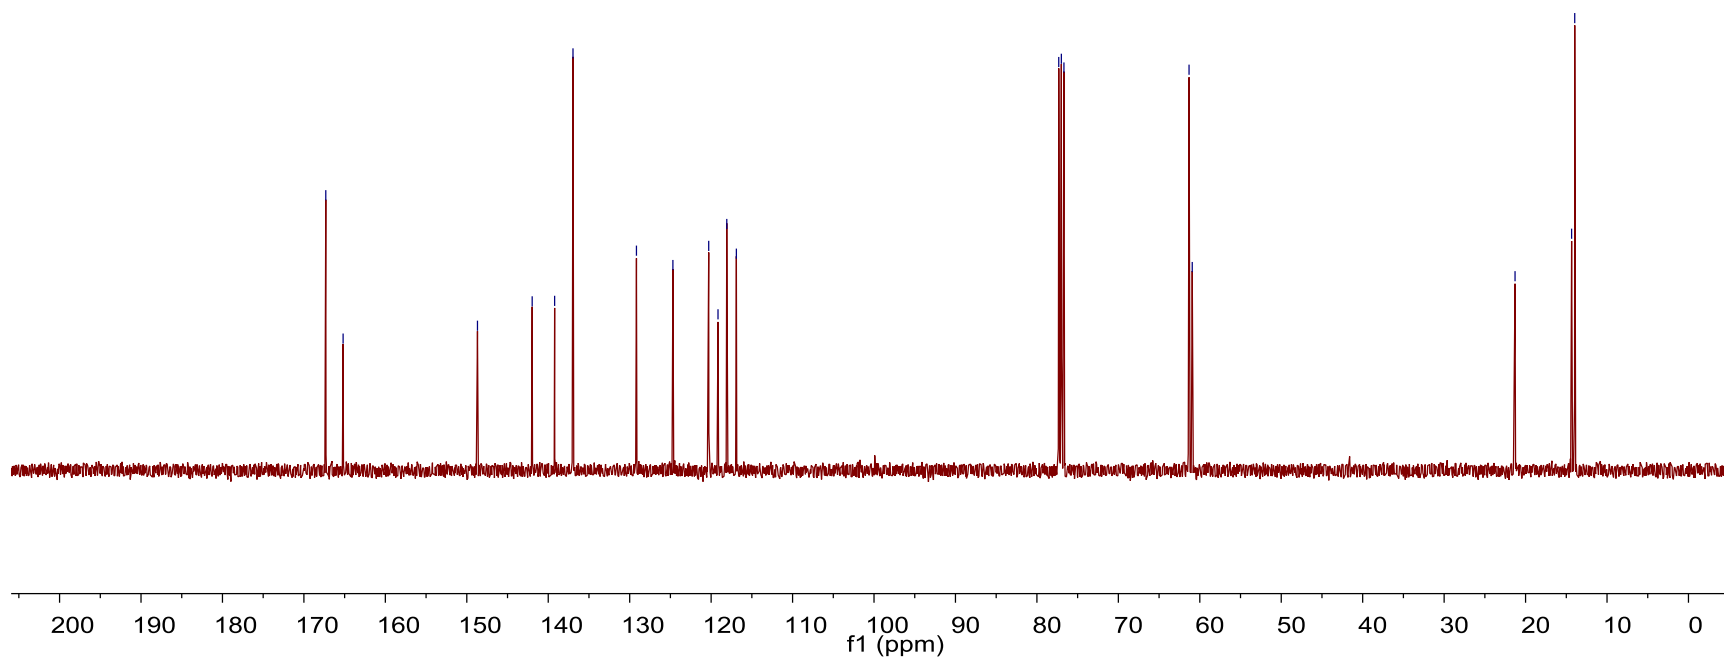

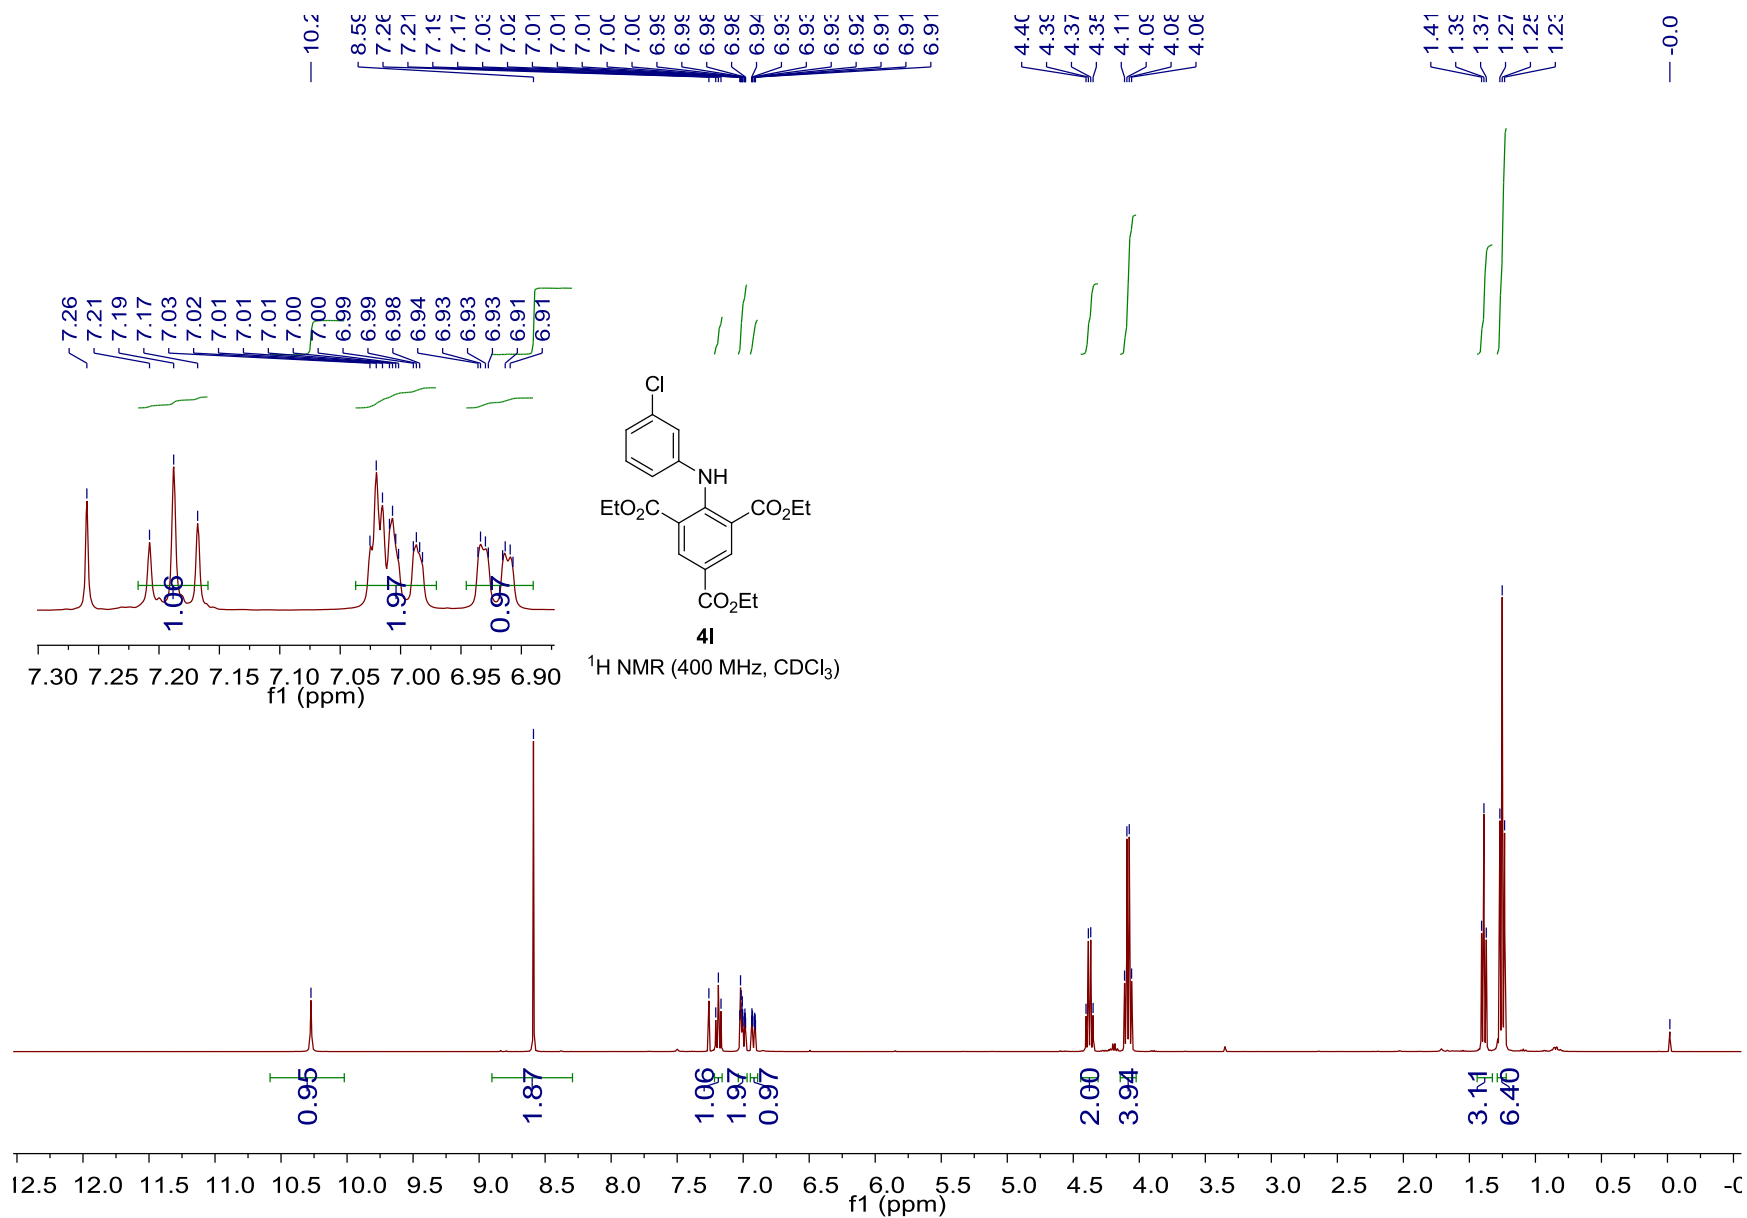

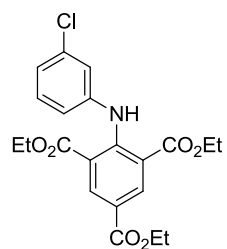

**4l**

<sup>13</sup>C NMR (100 MHz, CDCl<sub>3</sub>)

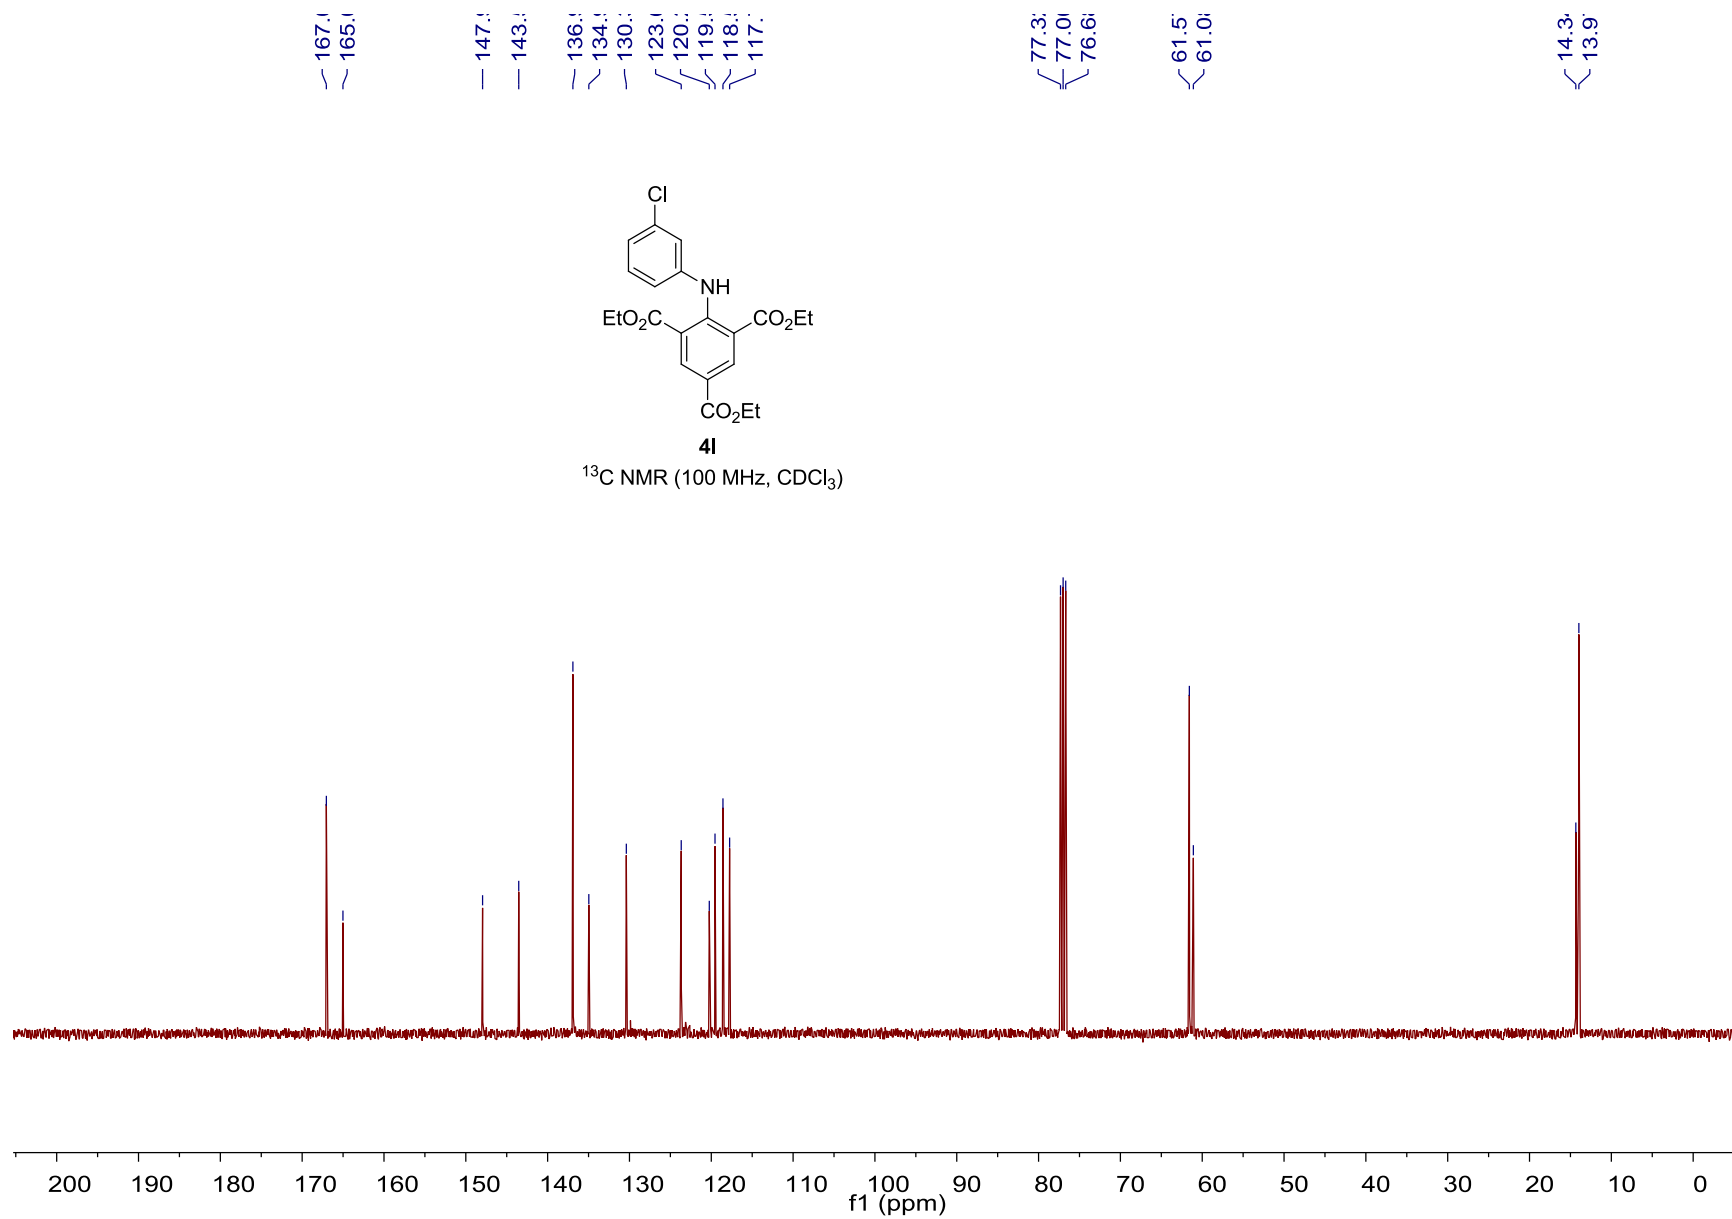

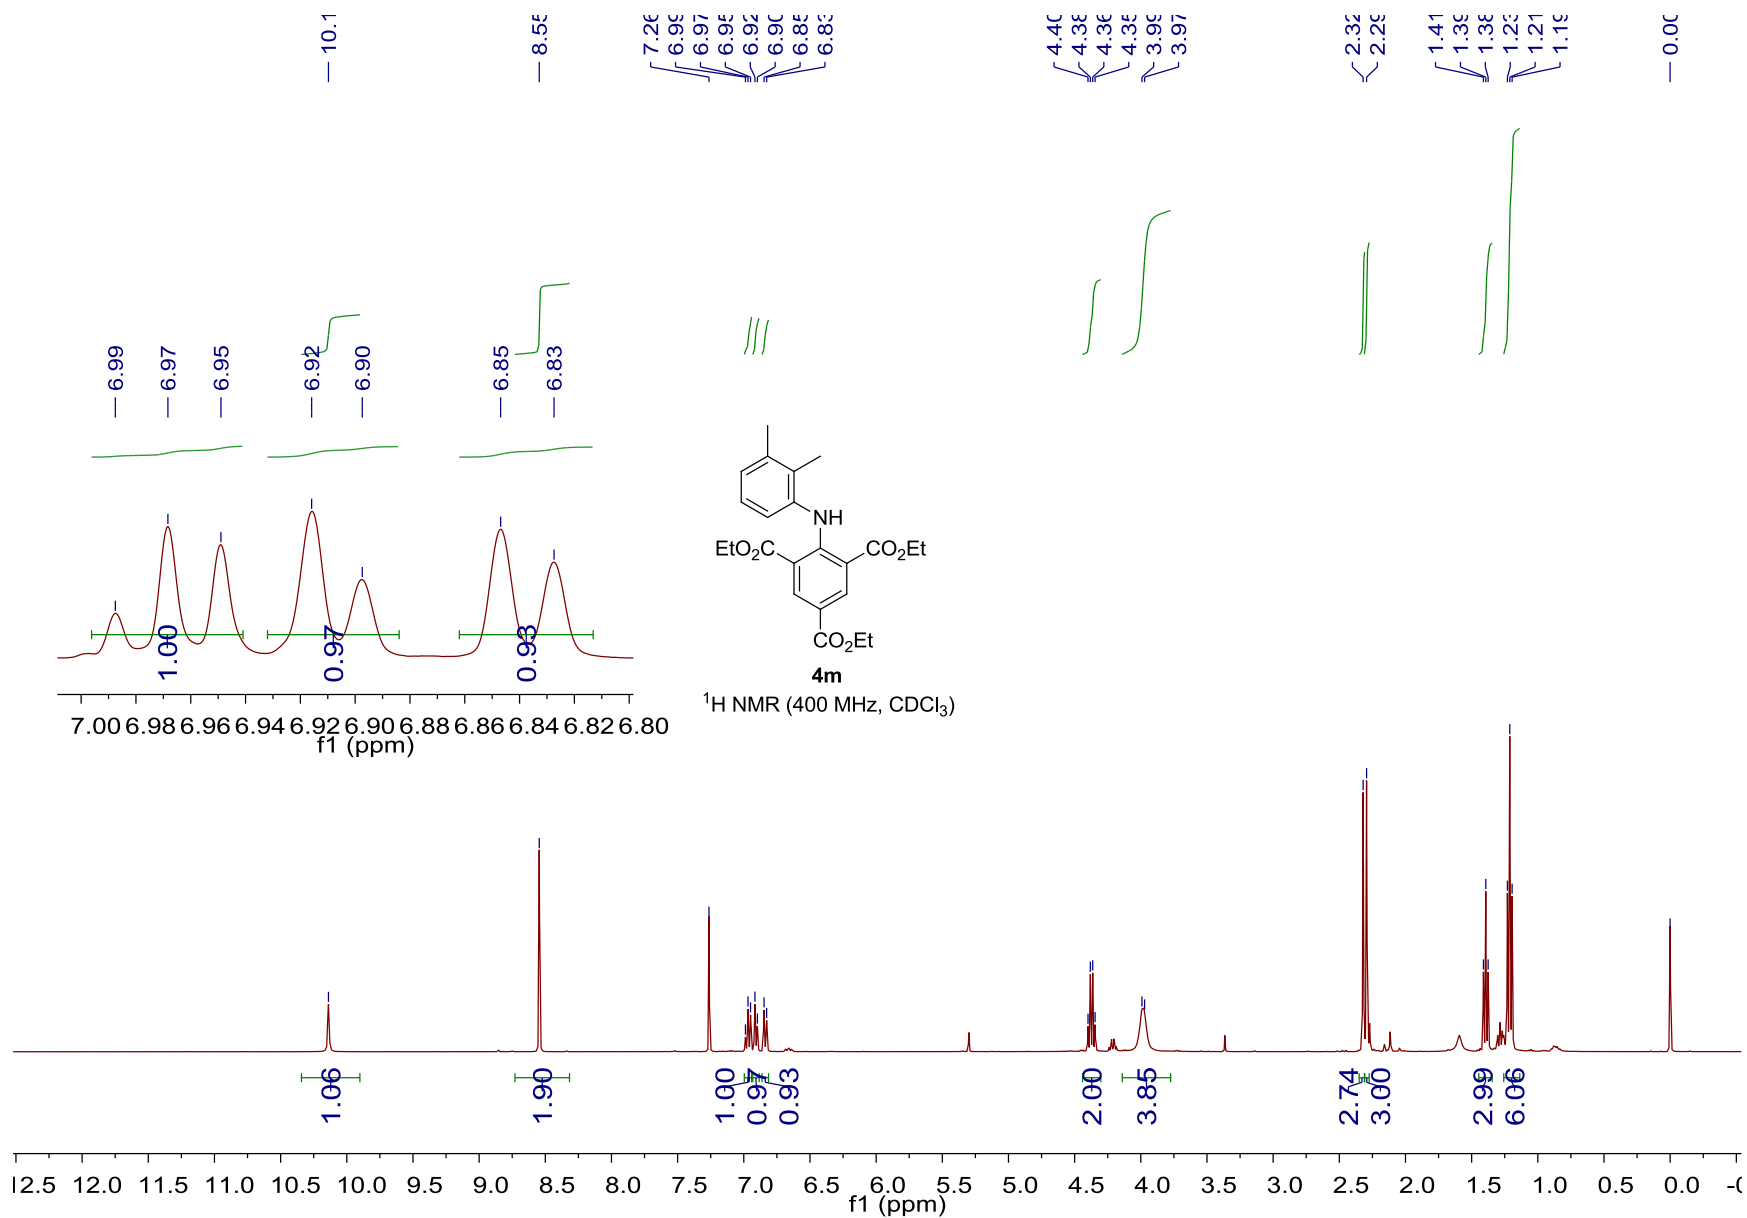

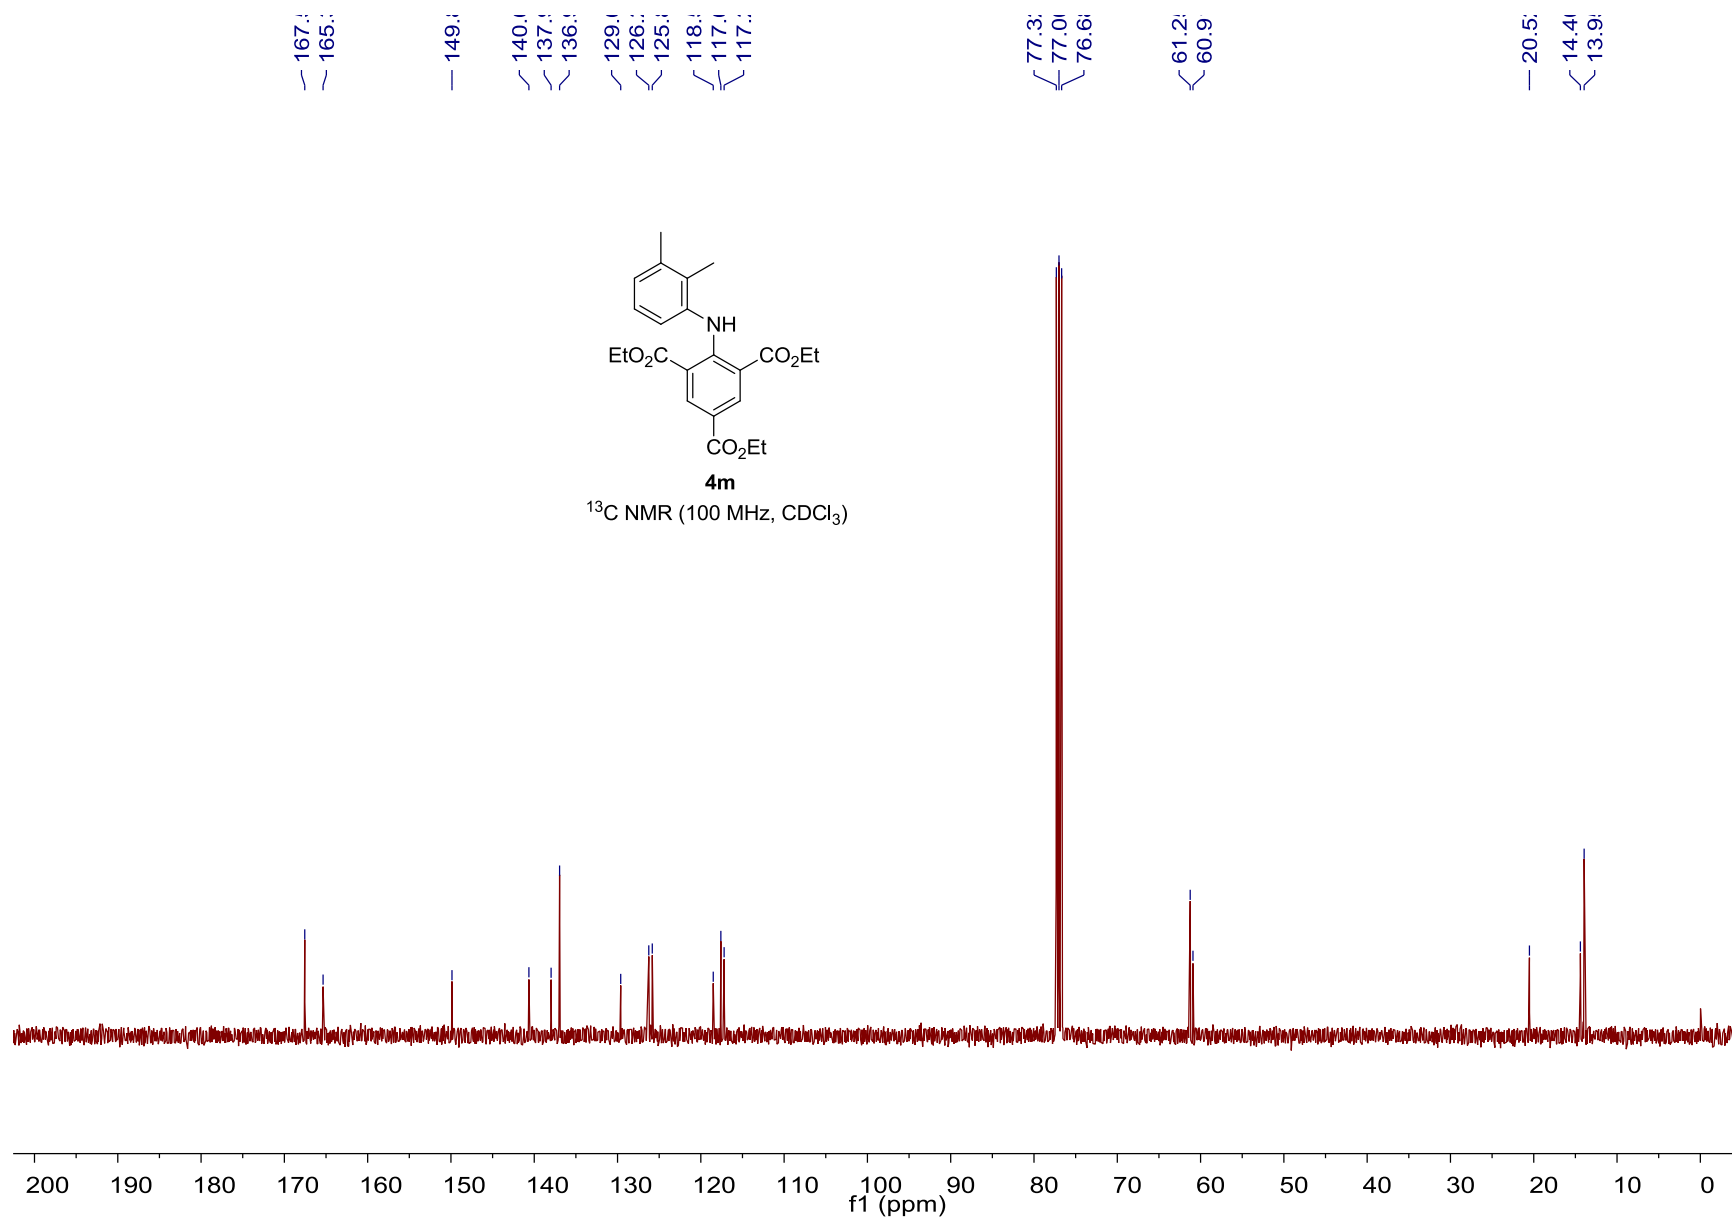

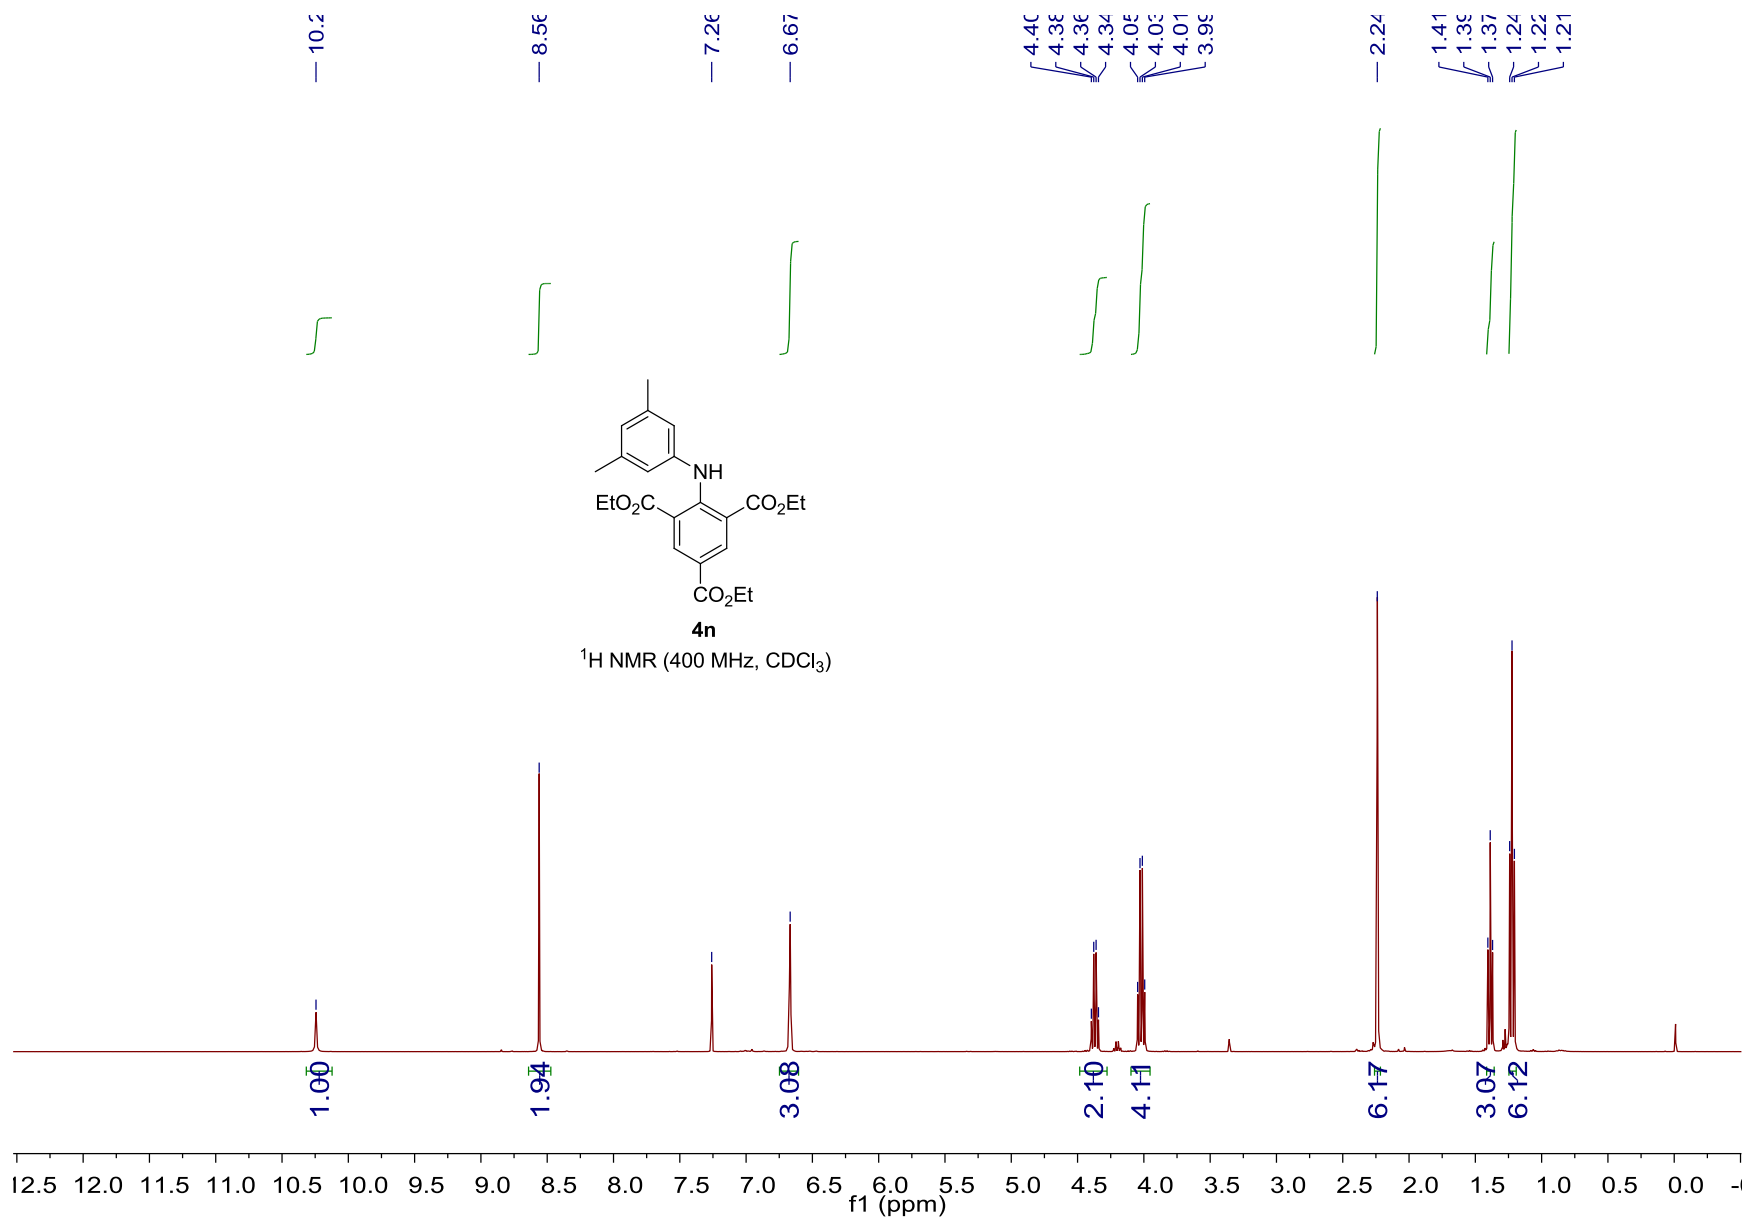

167.3  
165.3

148.1

141.1

139.1

136.1

125.1

119.1

118.1

117.1

77.3

77.0

76.6

61.3

60.9

21.2

14.3

13.9

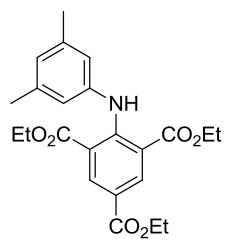

**4n**

<sup>13</sup>C NMR (100 MHz, CDCl<sub>3</sub>)

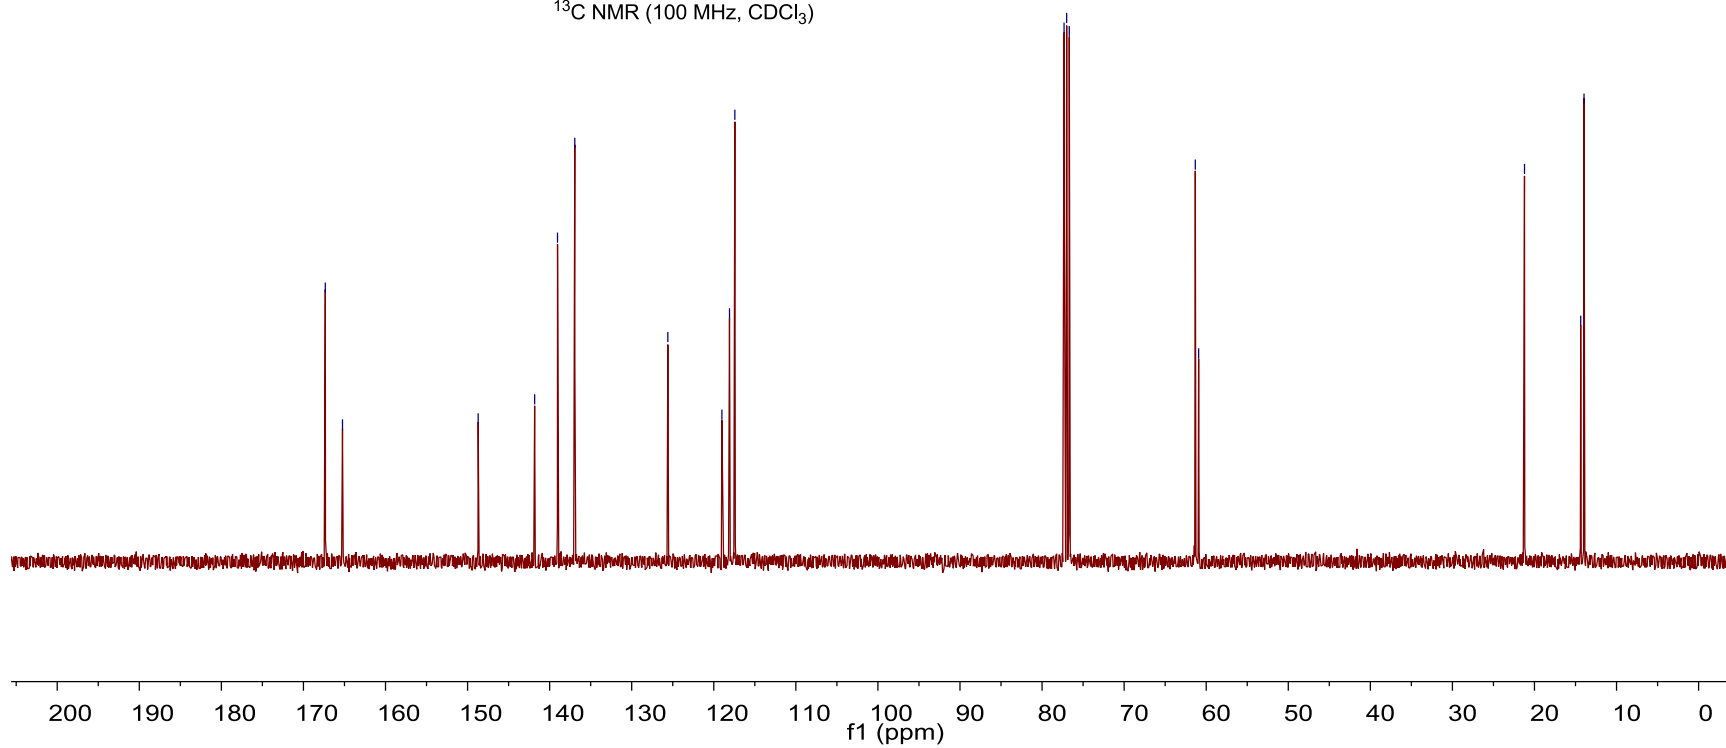

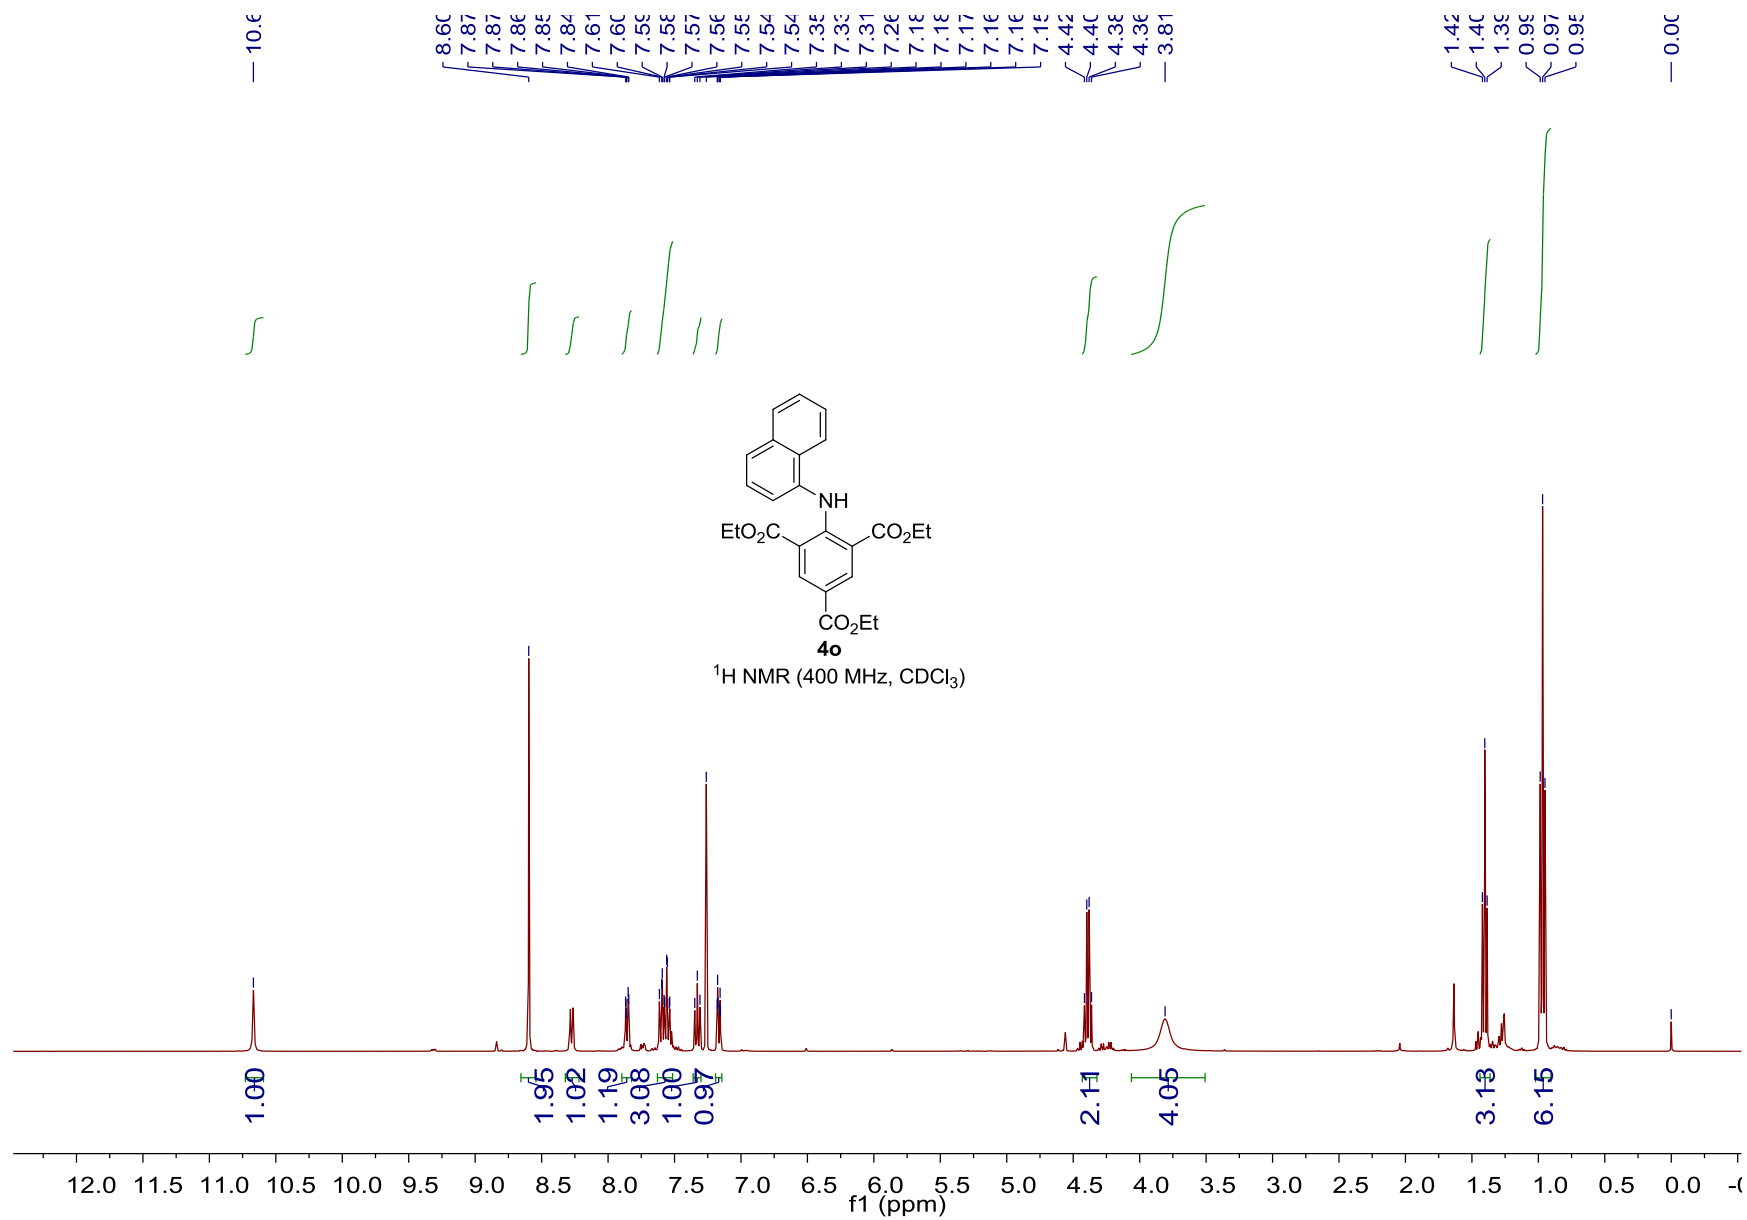

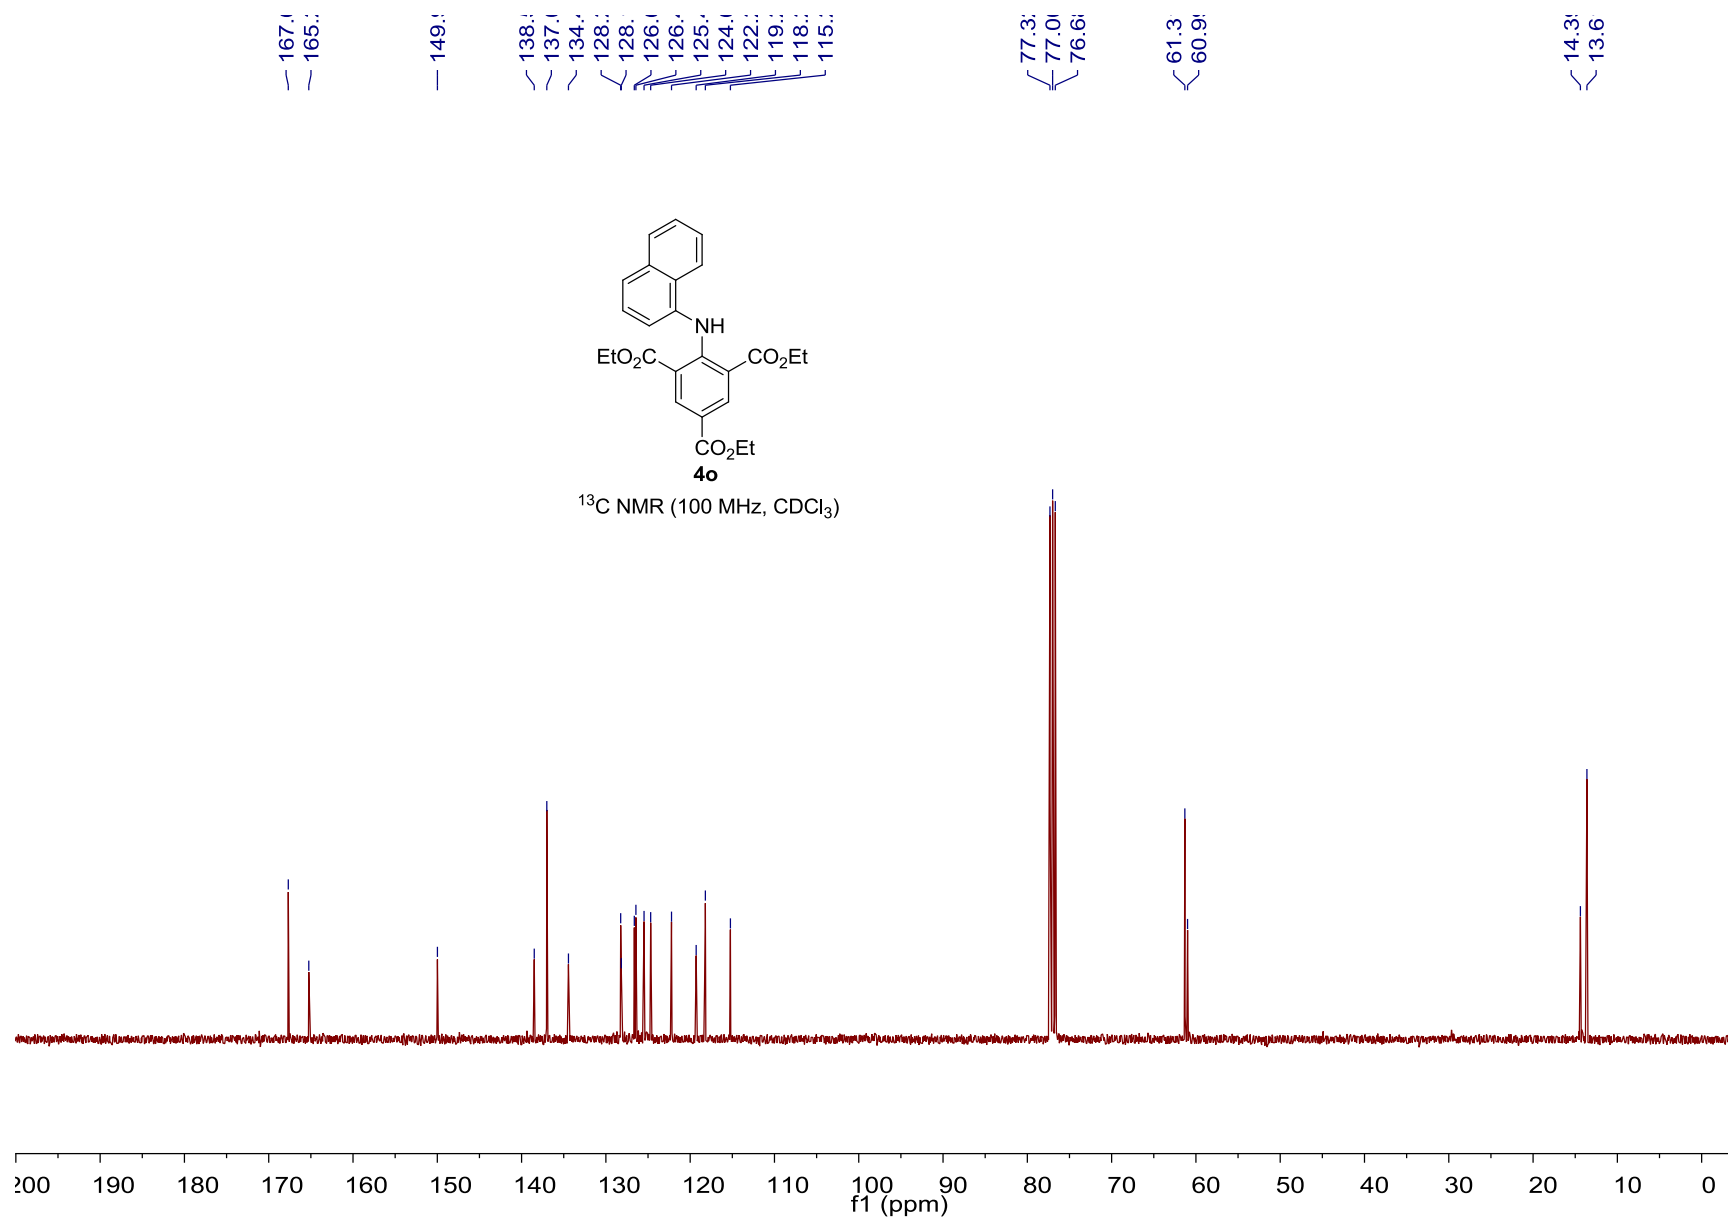

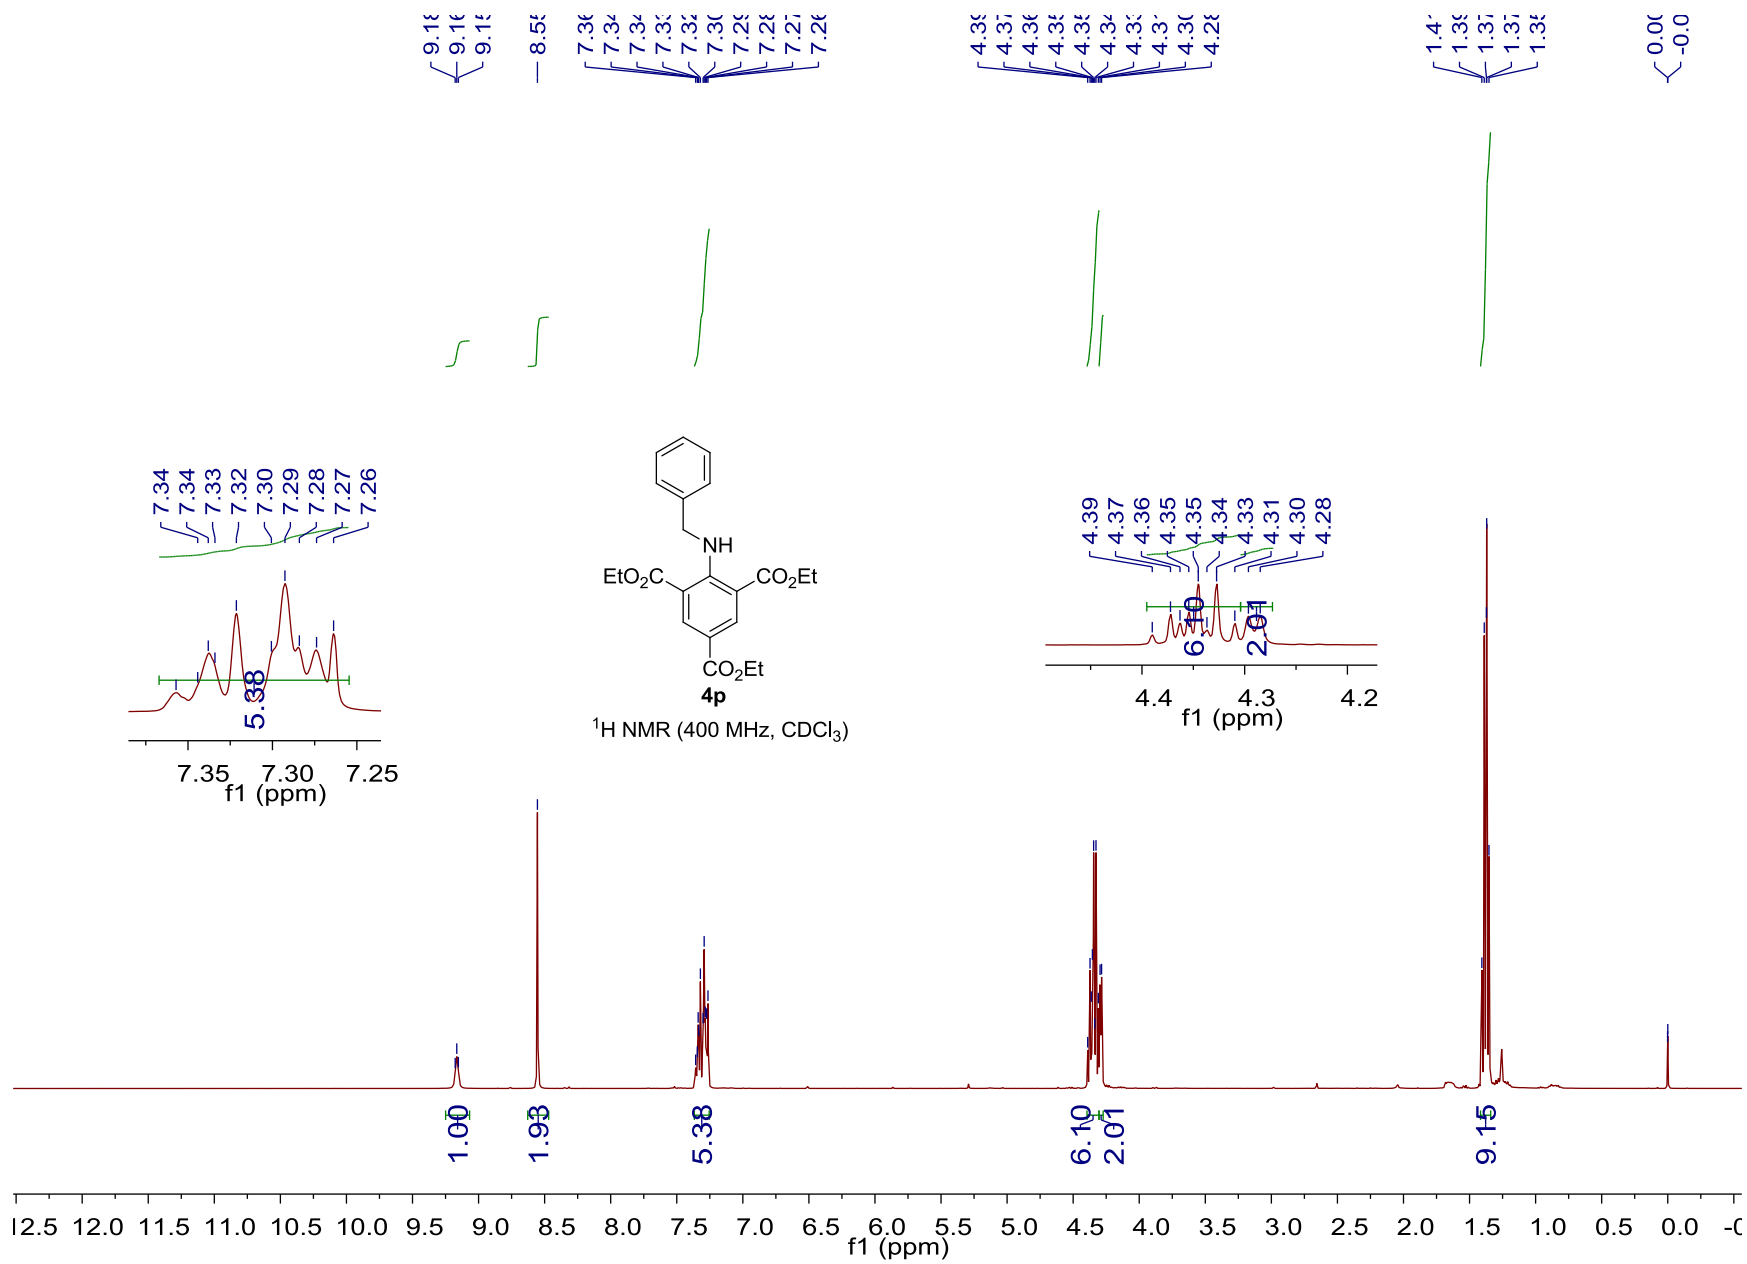

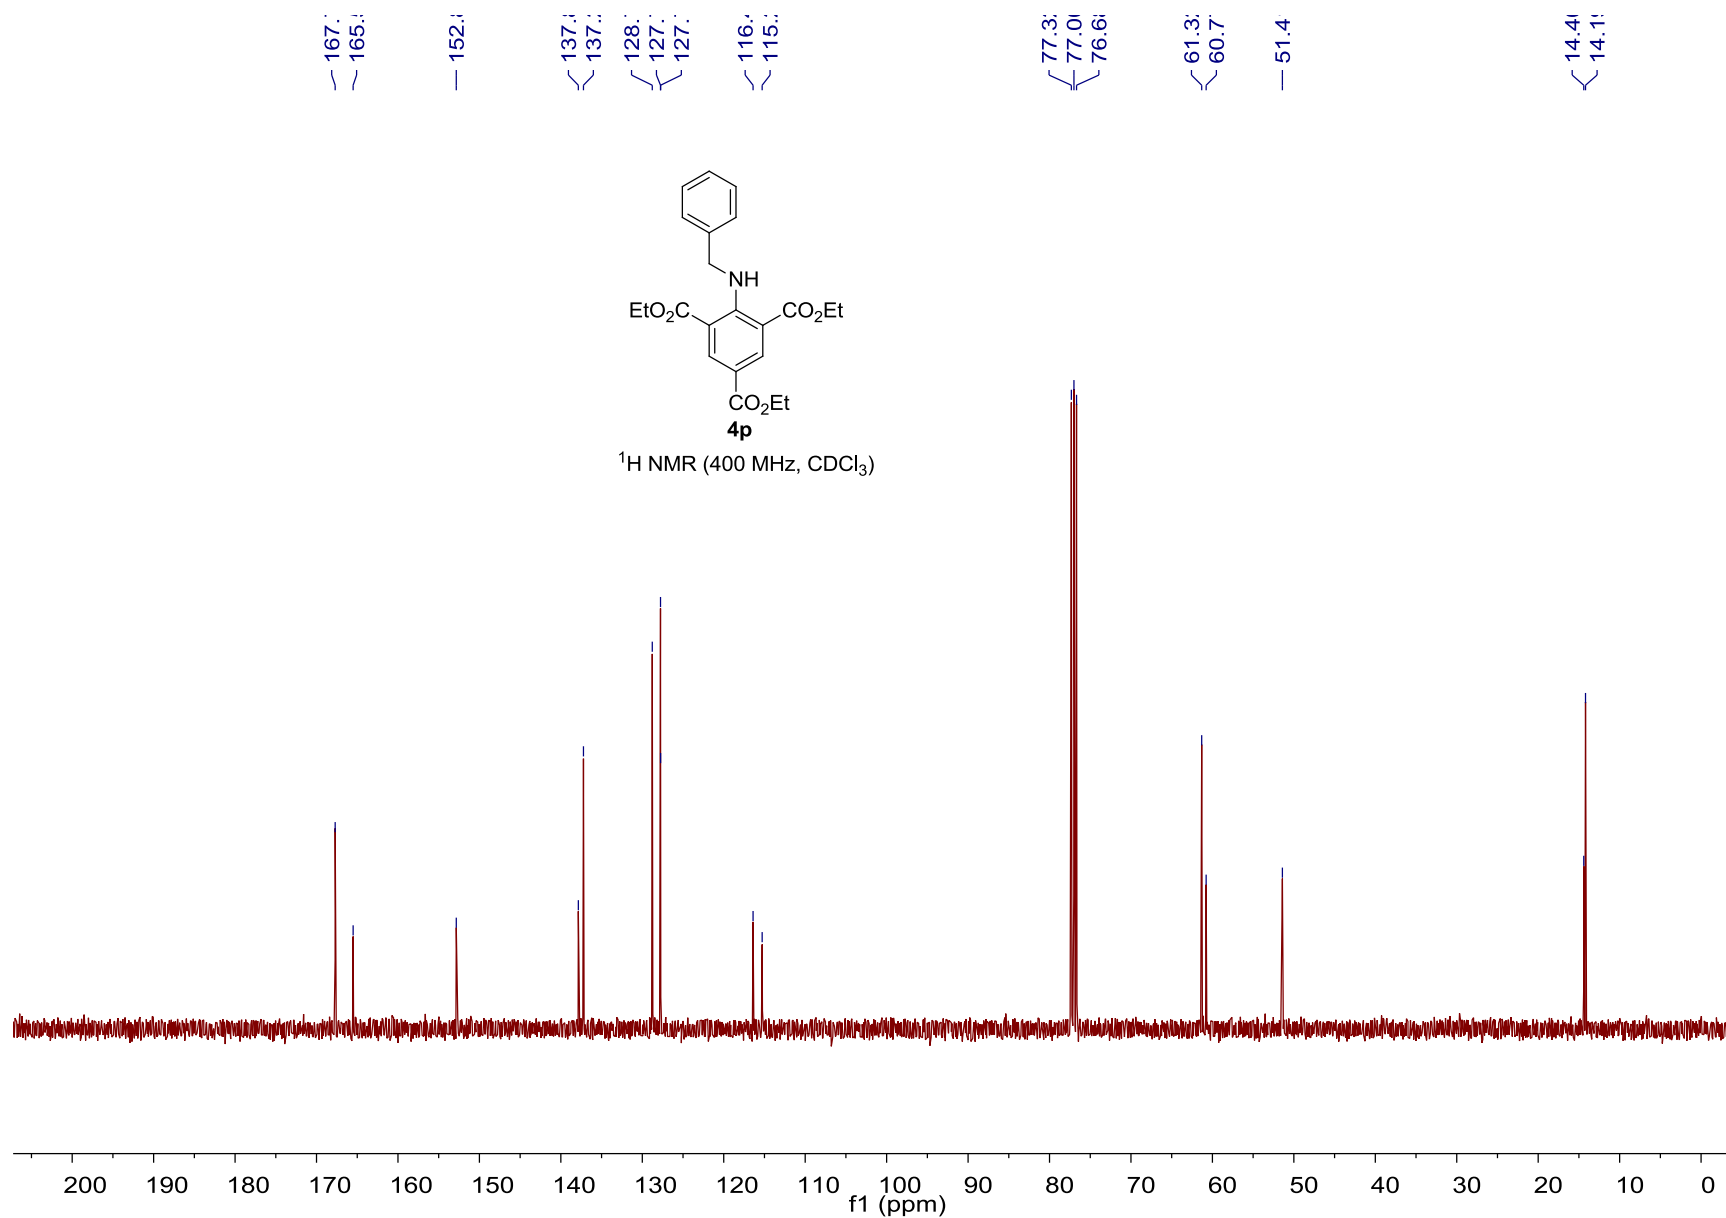

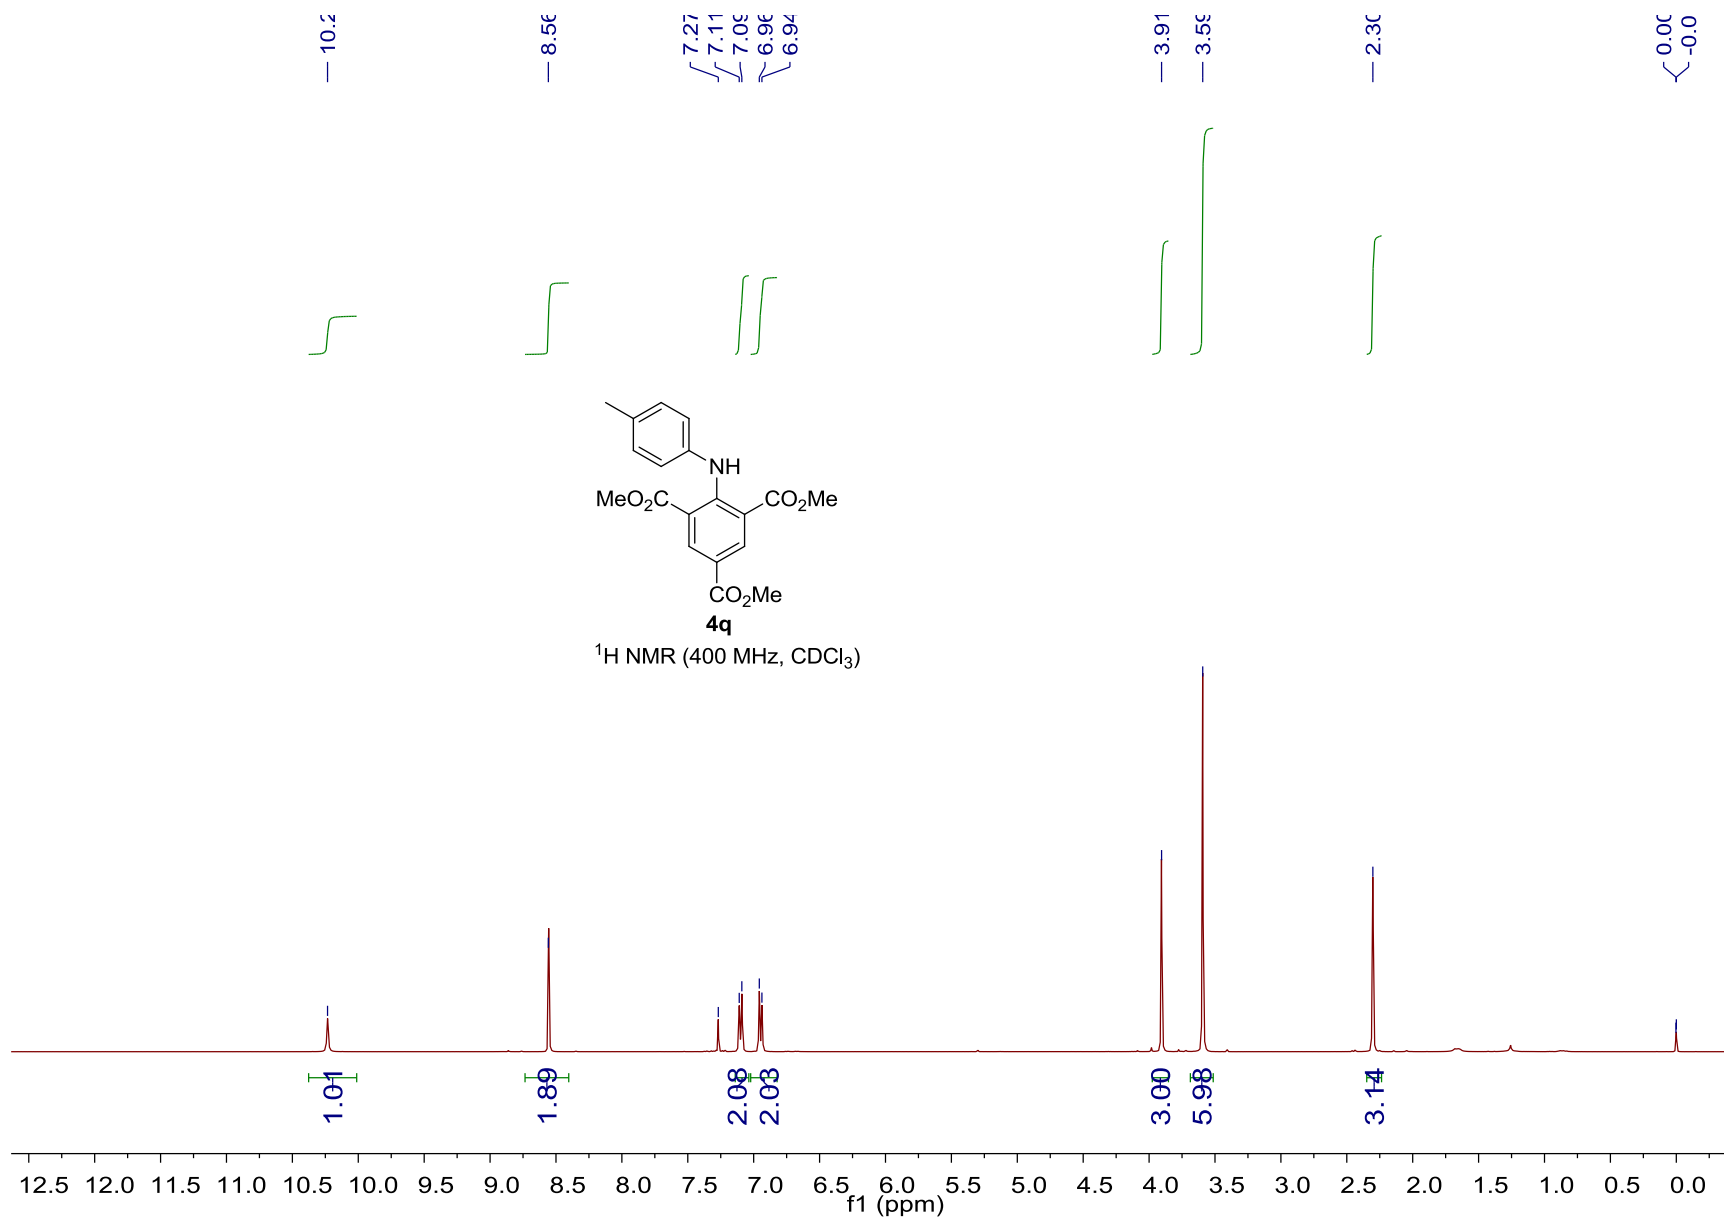

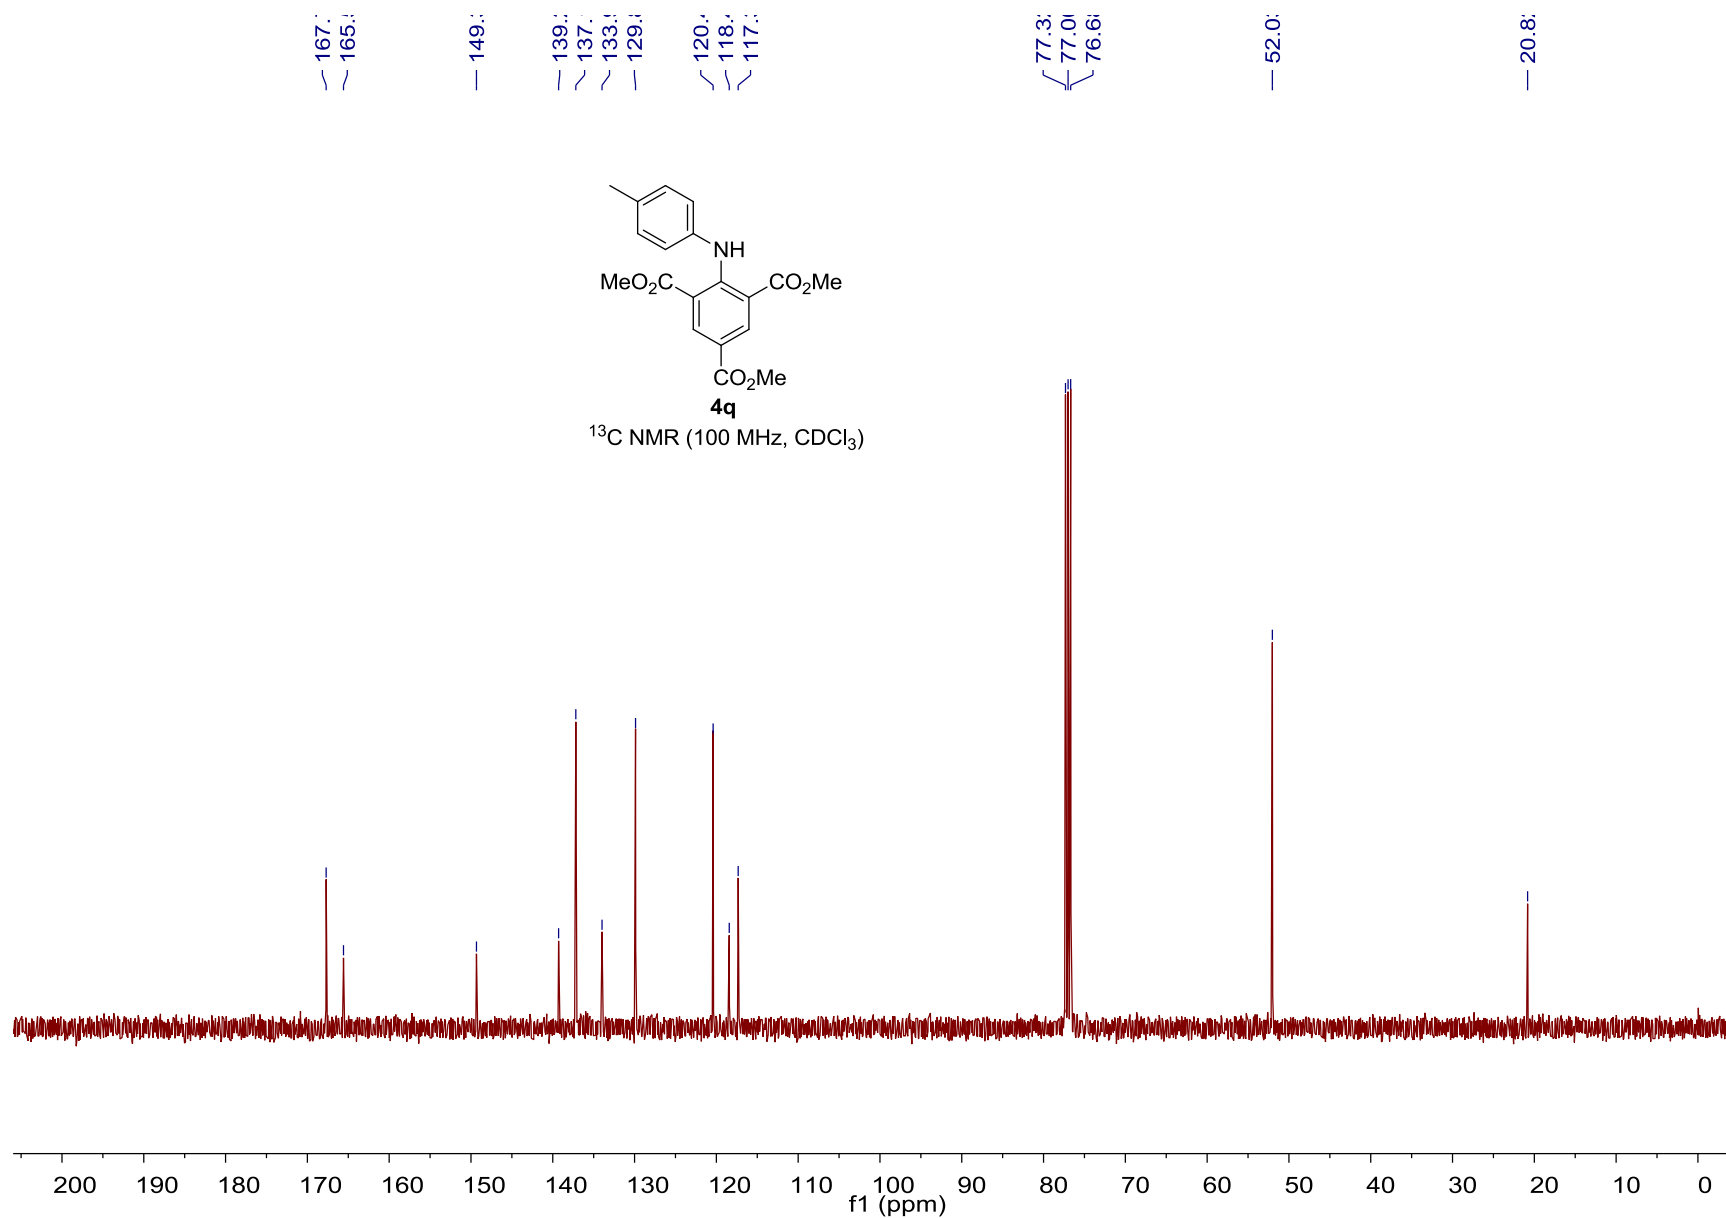

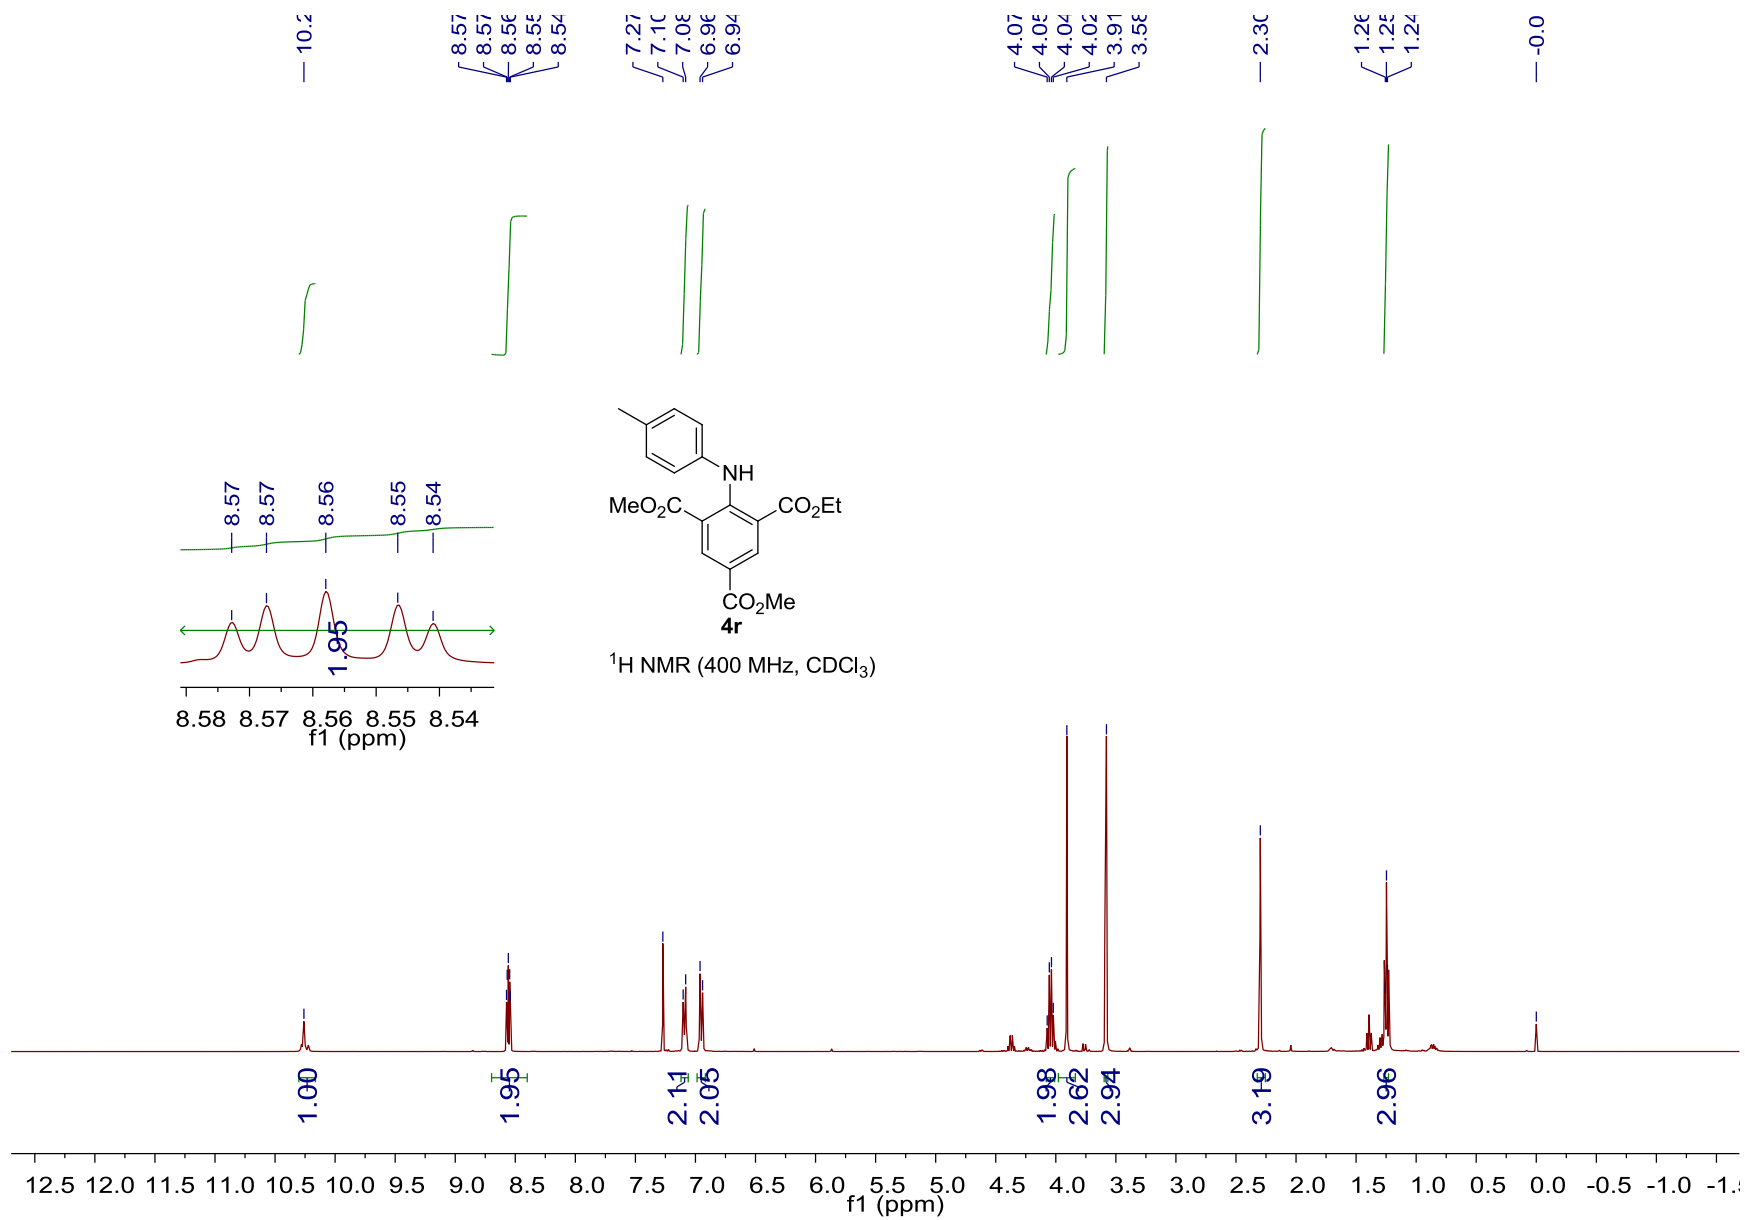

167.1  
167.1  
165.1

149.1

139.1  
137.1  
137.1  
133.1  
129.1

120.1  
118.1  
117.1  
117.1

77.3  
77.0  
76.6

61.3

52.0  
51.9

20.7

14.0

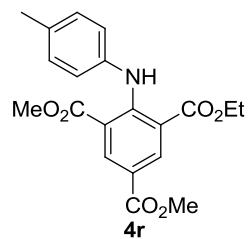

$^{13}\text{C}$  NMR (100 MHz,  $\text{CDCl}_3$ )

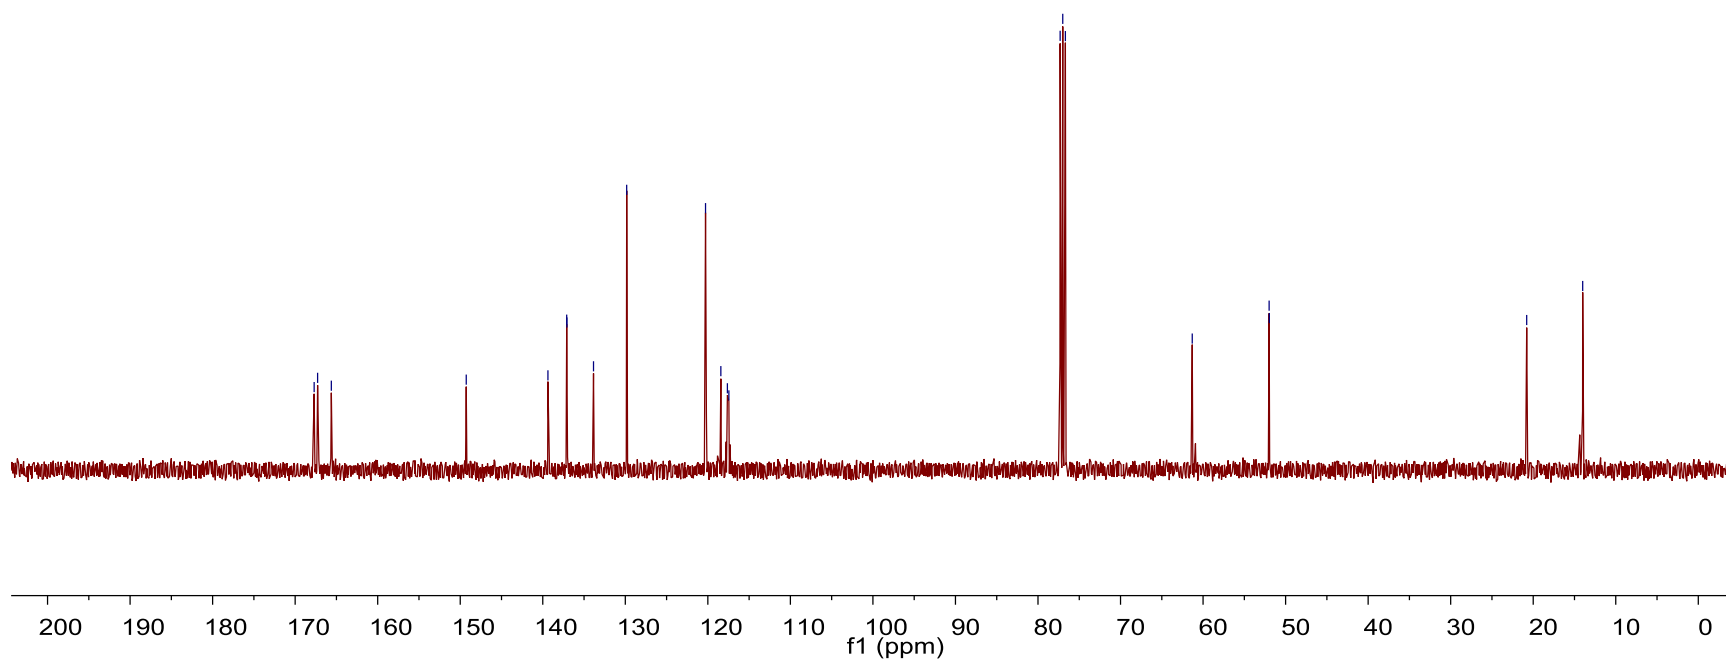

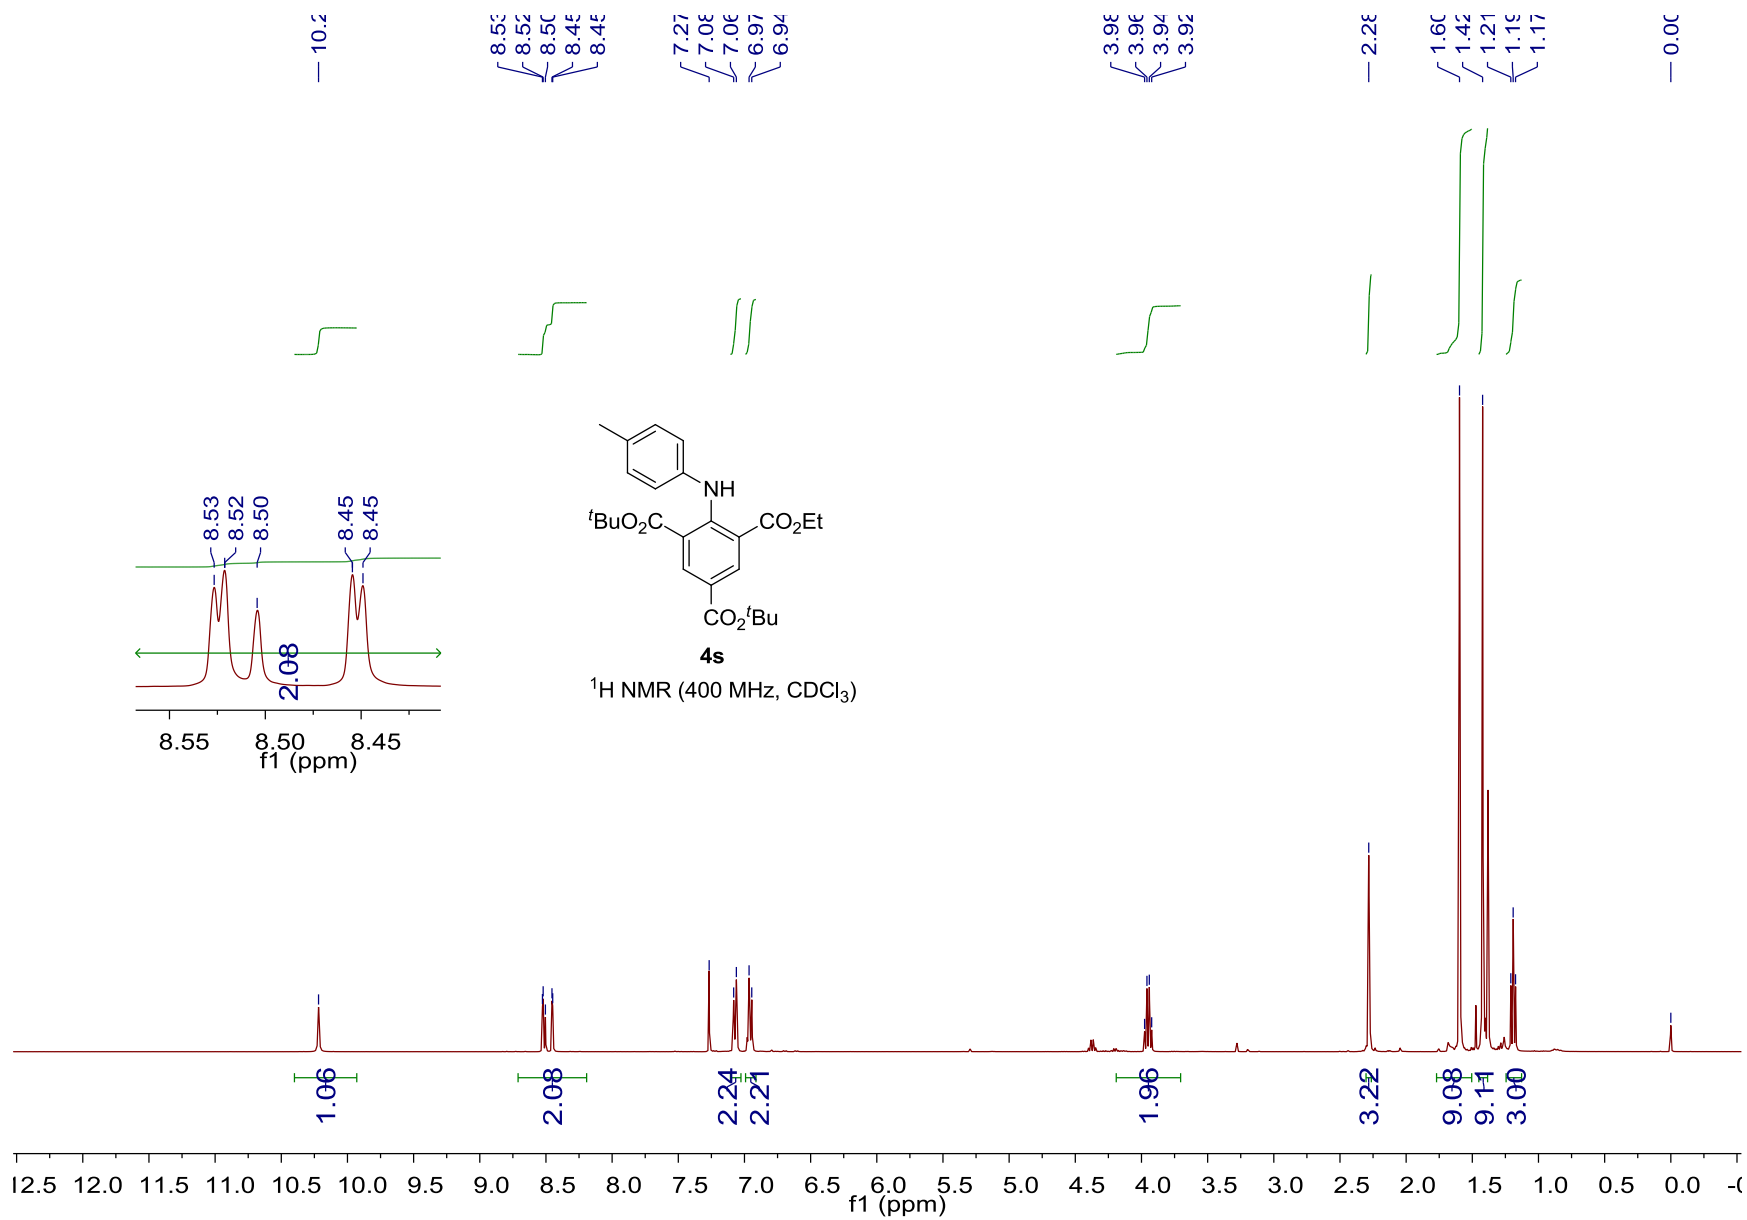

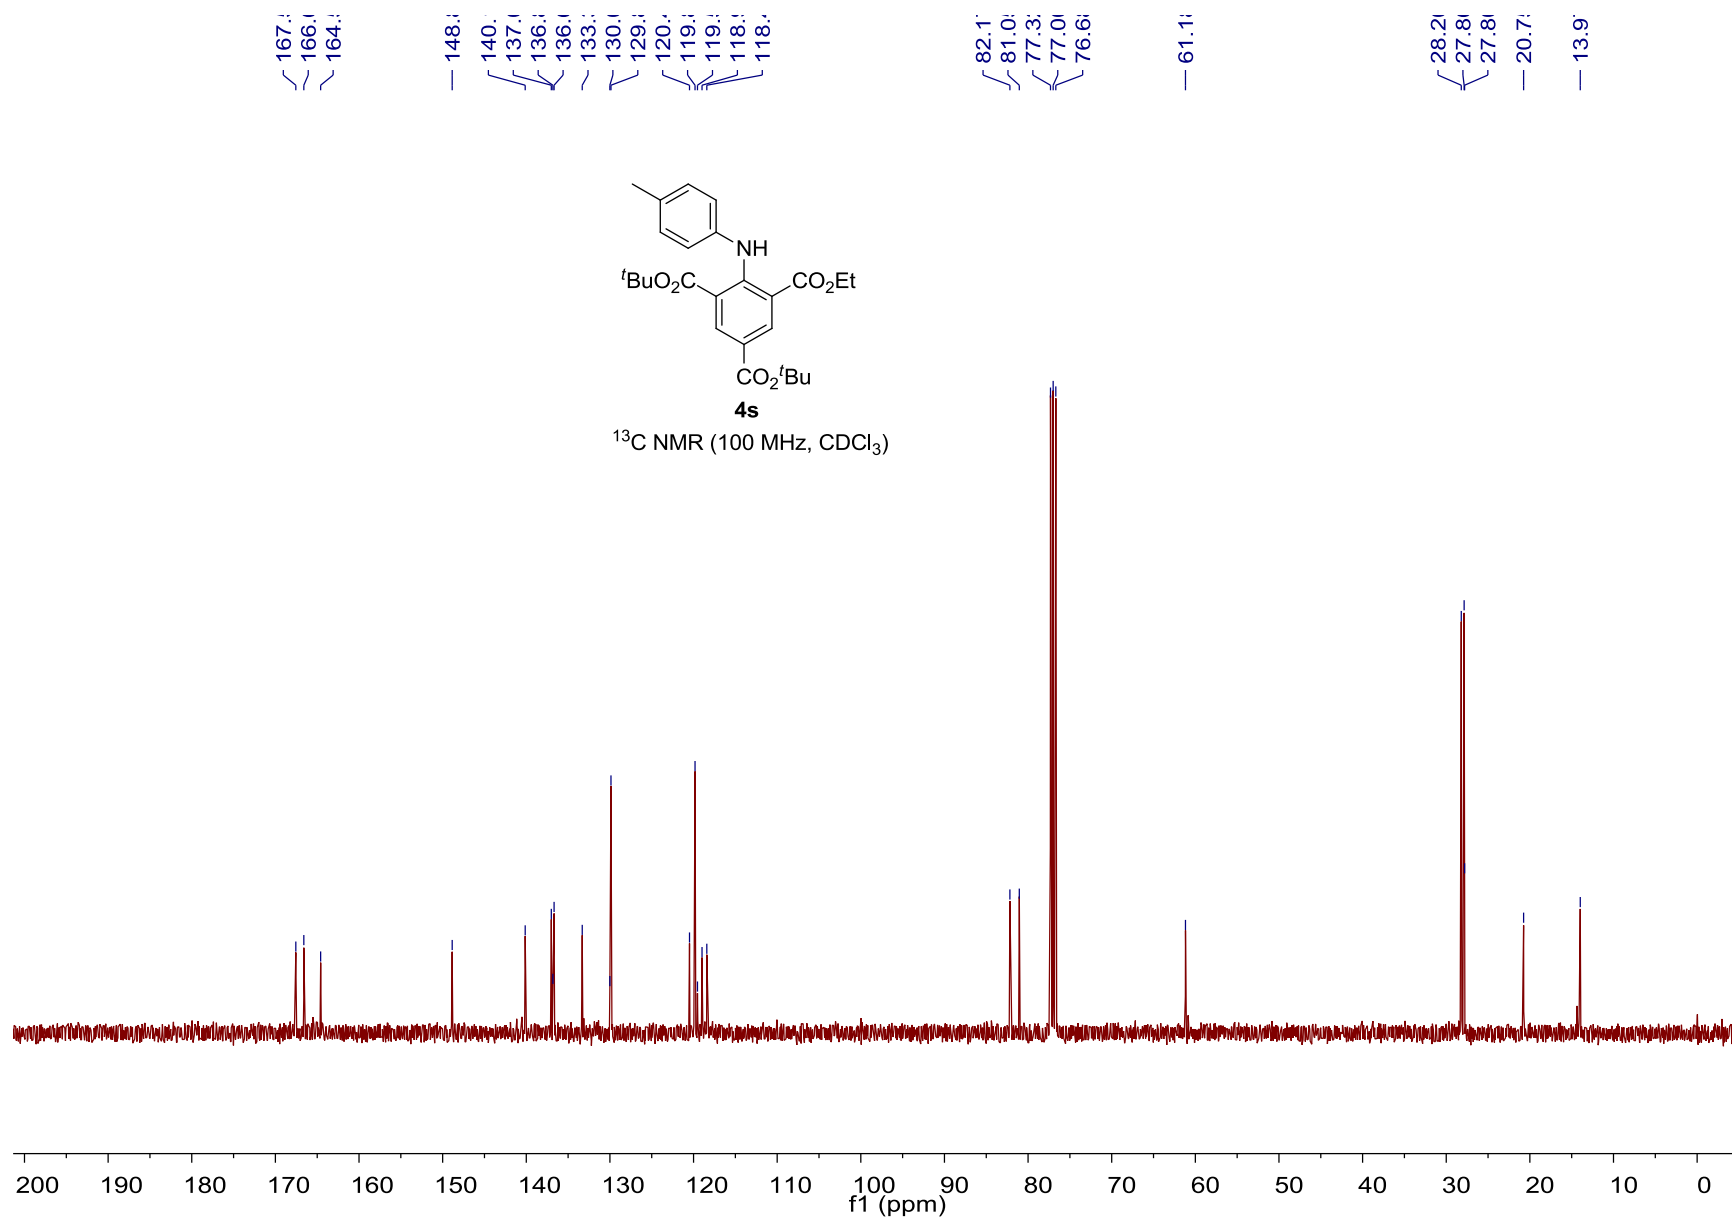

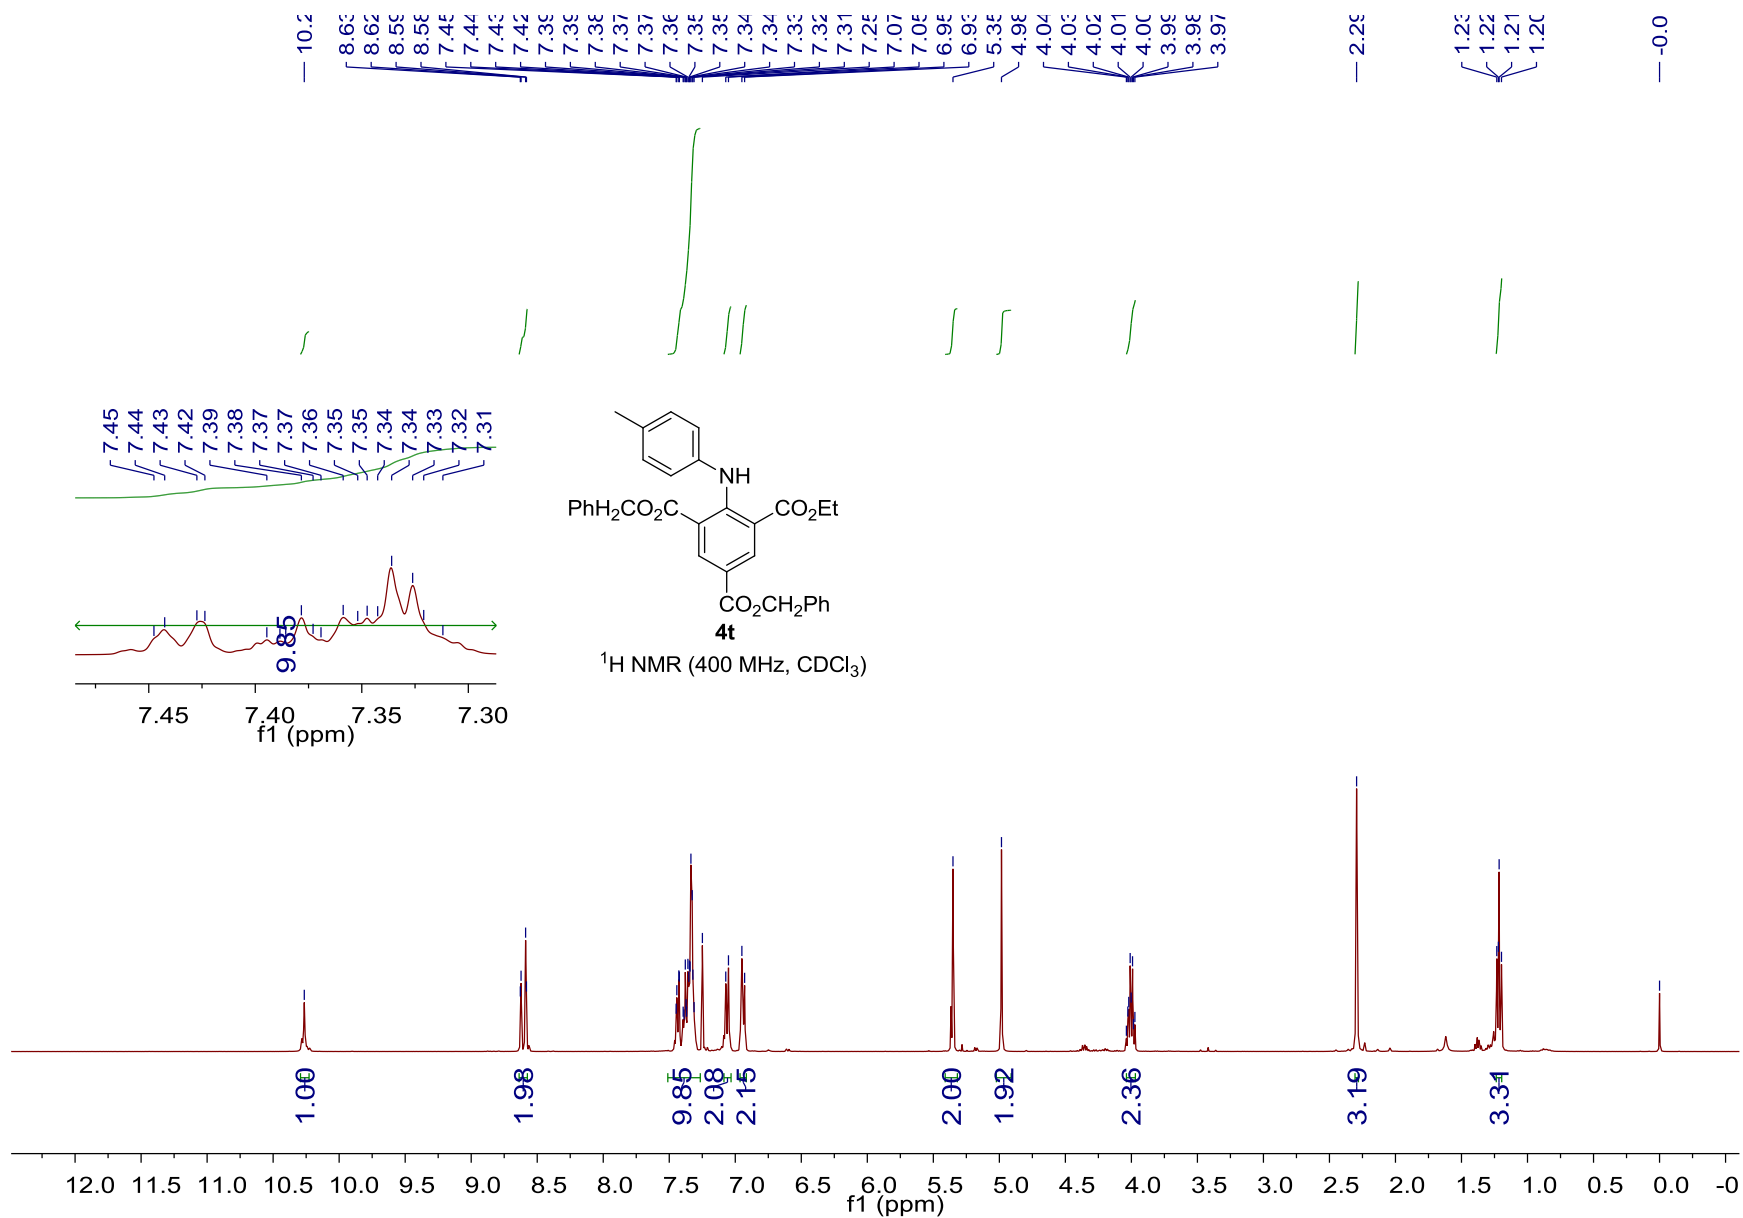

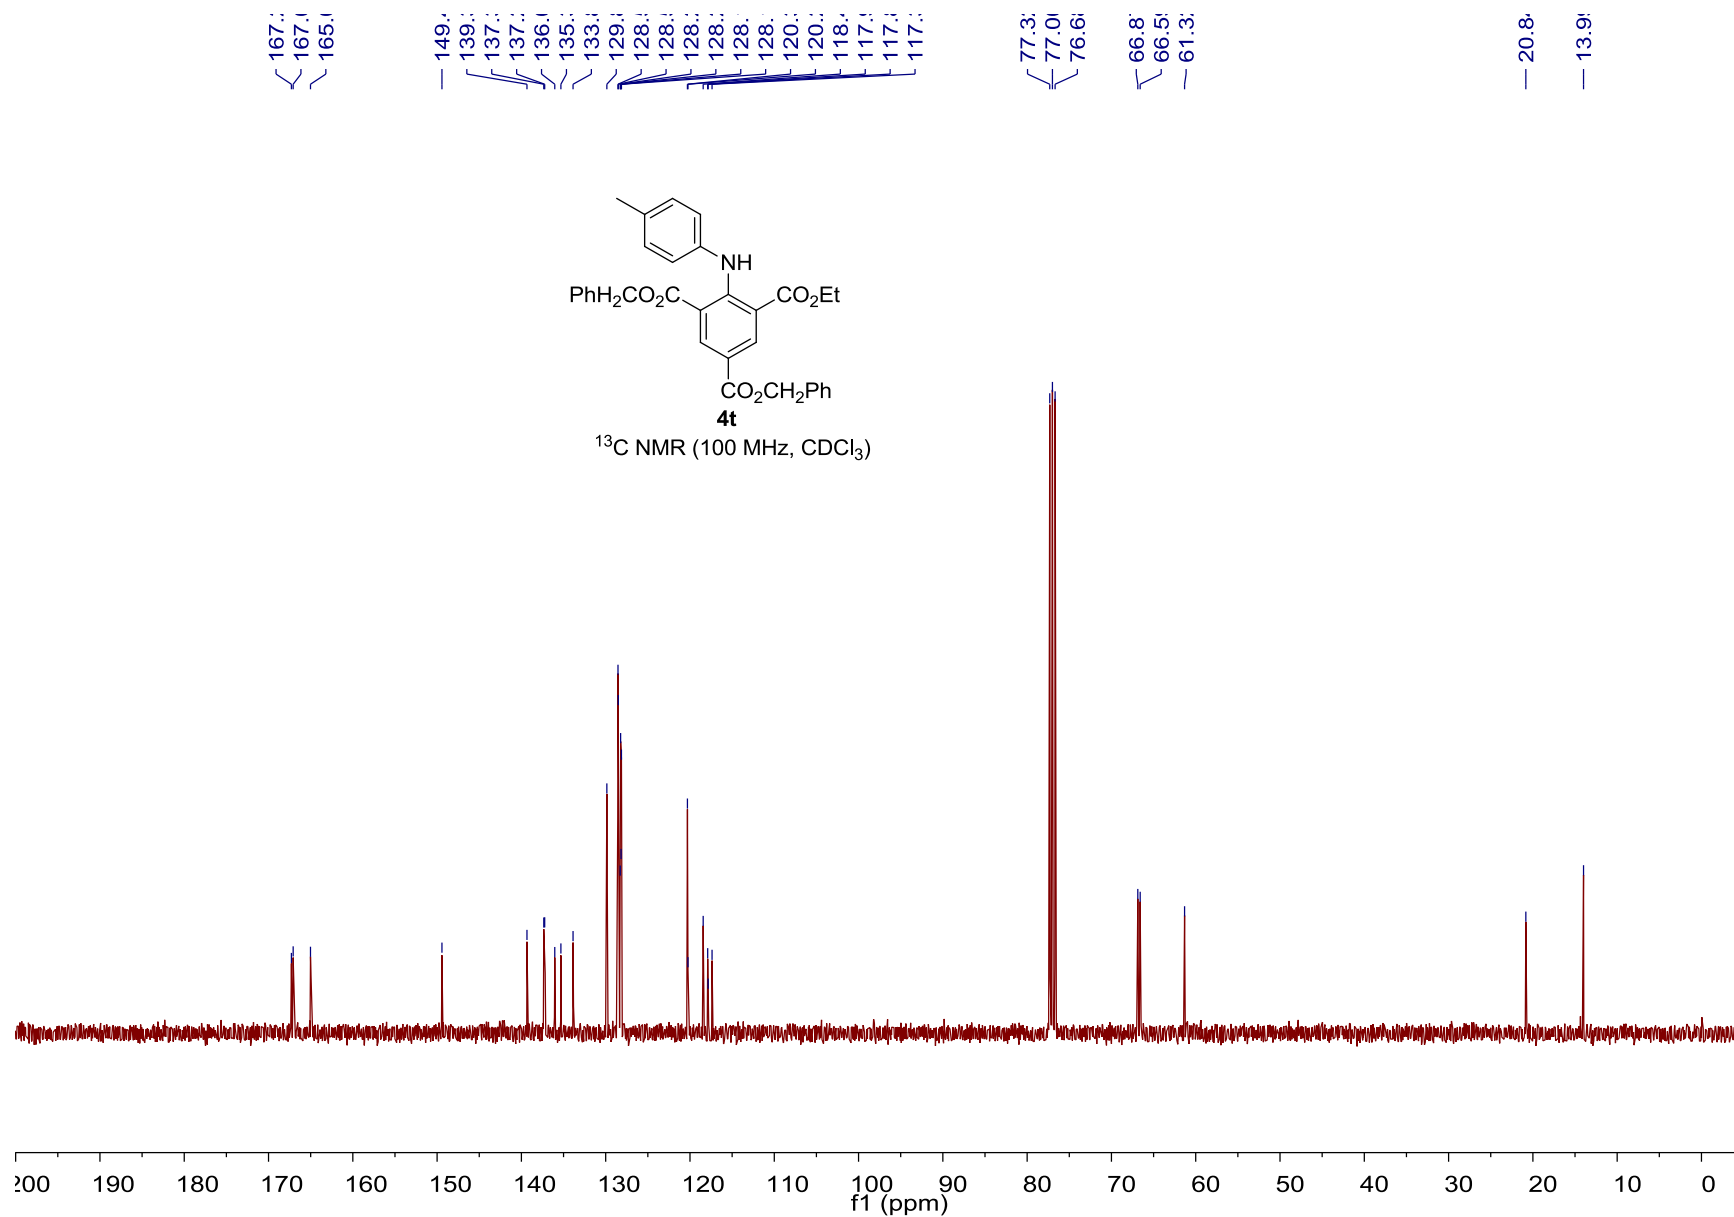

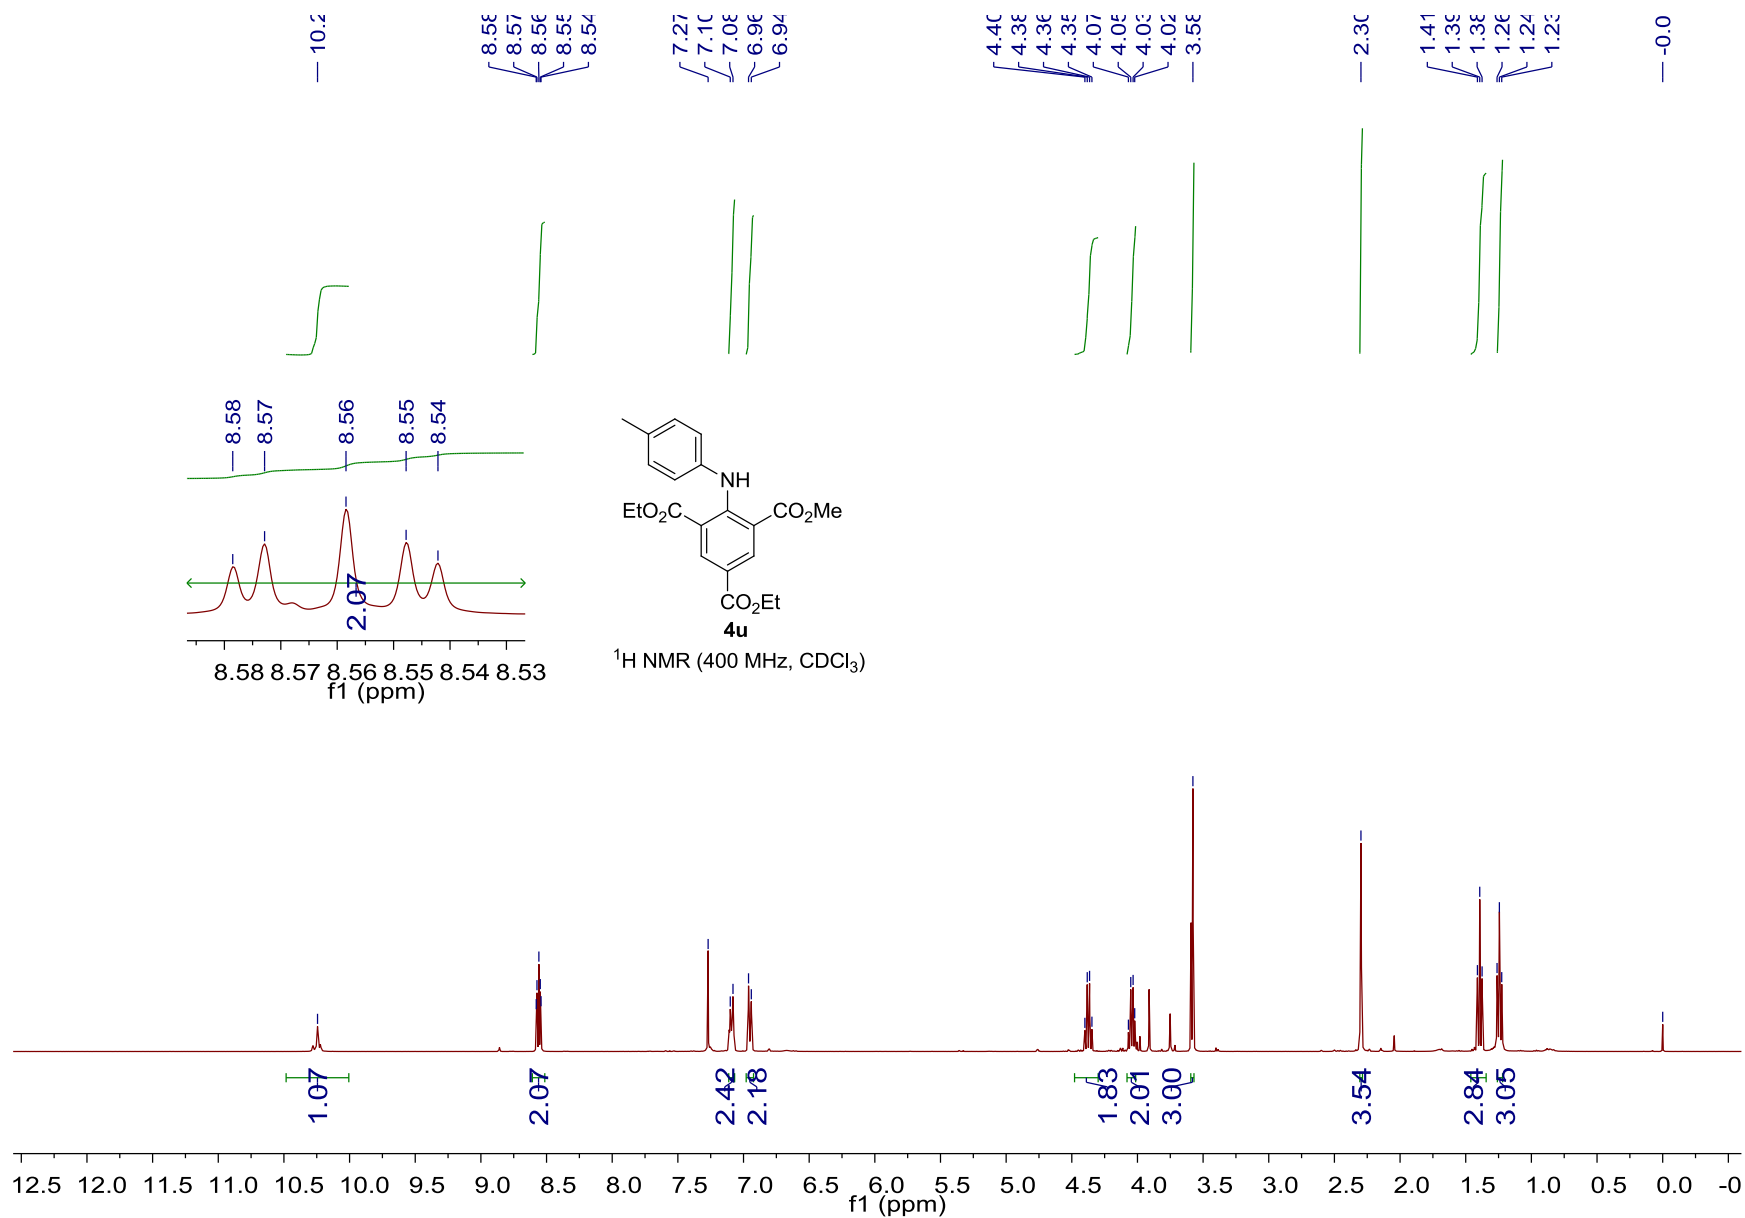

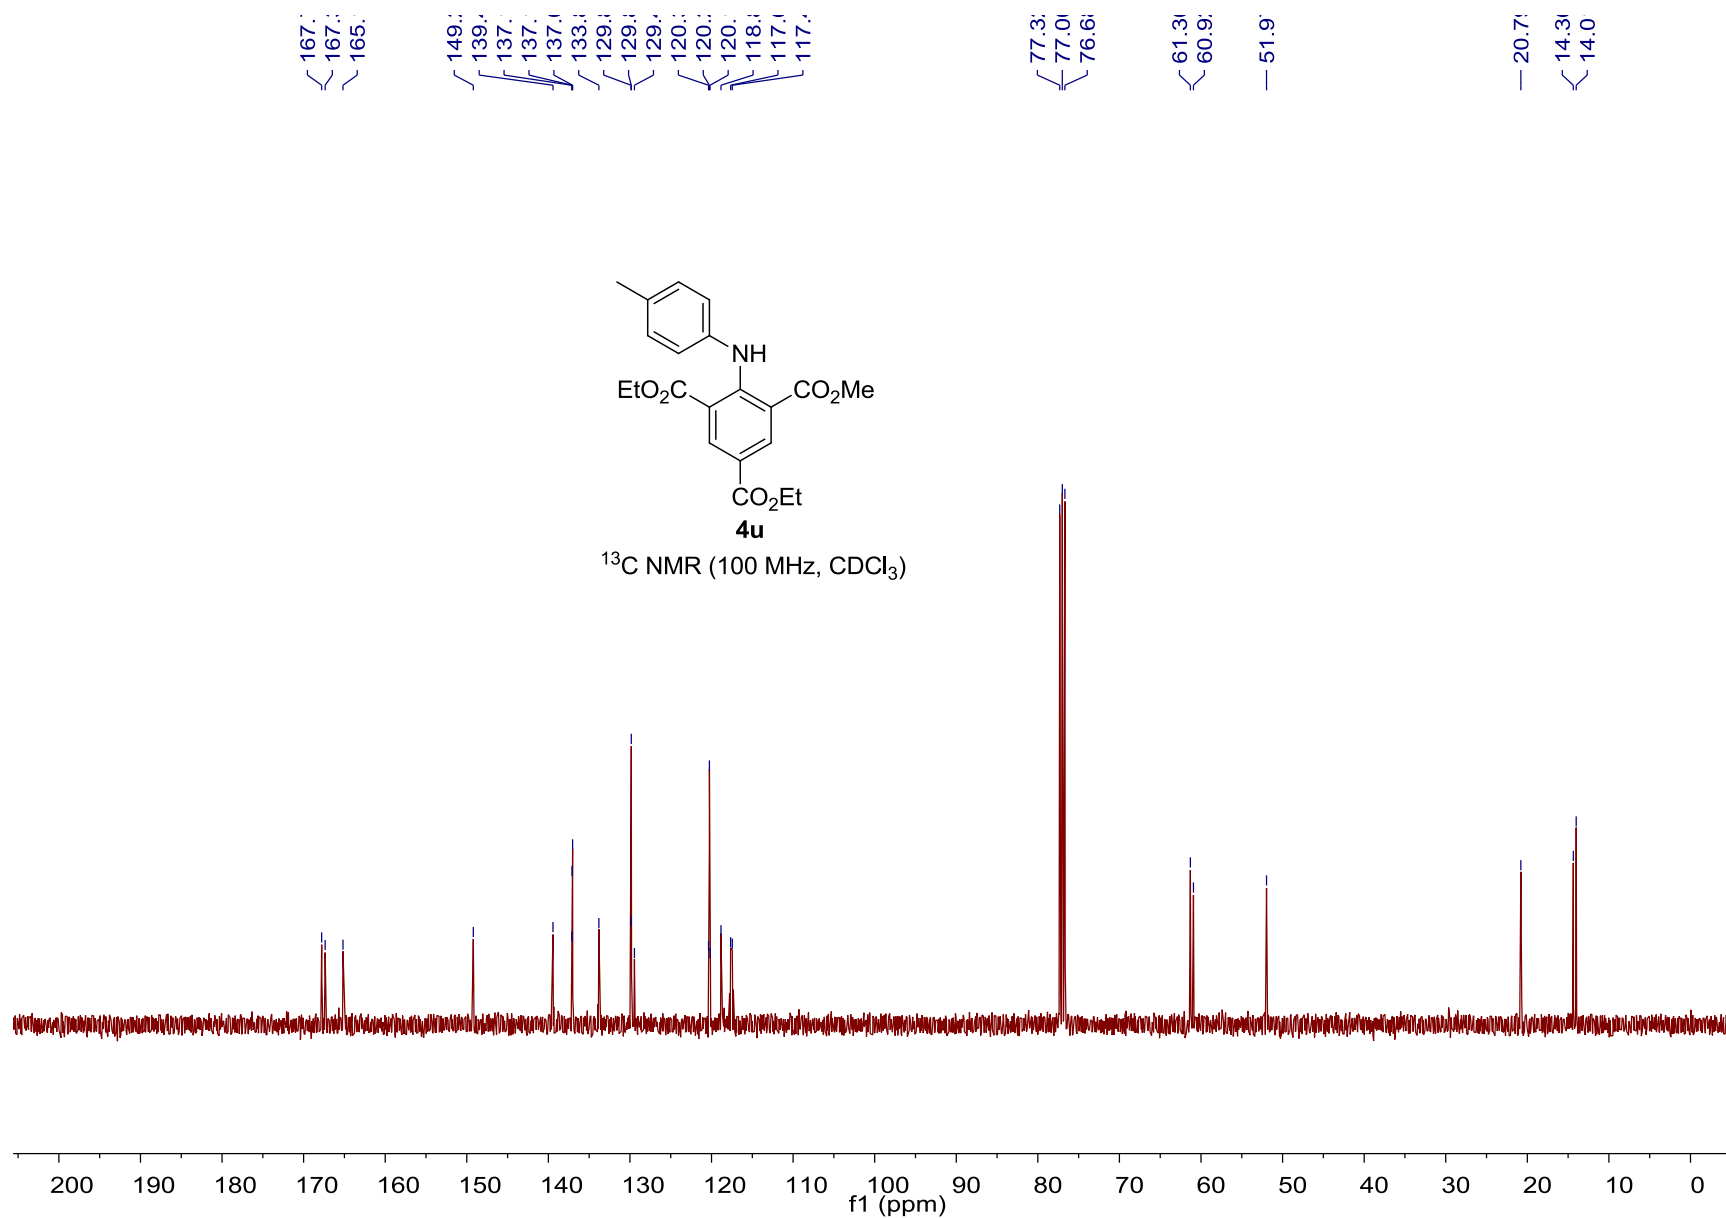

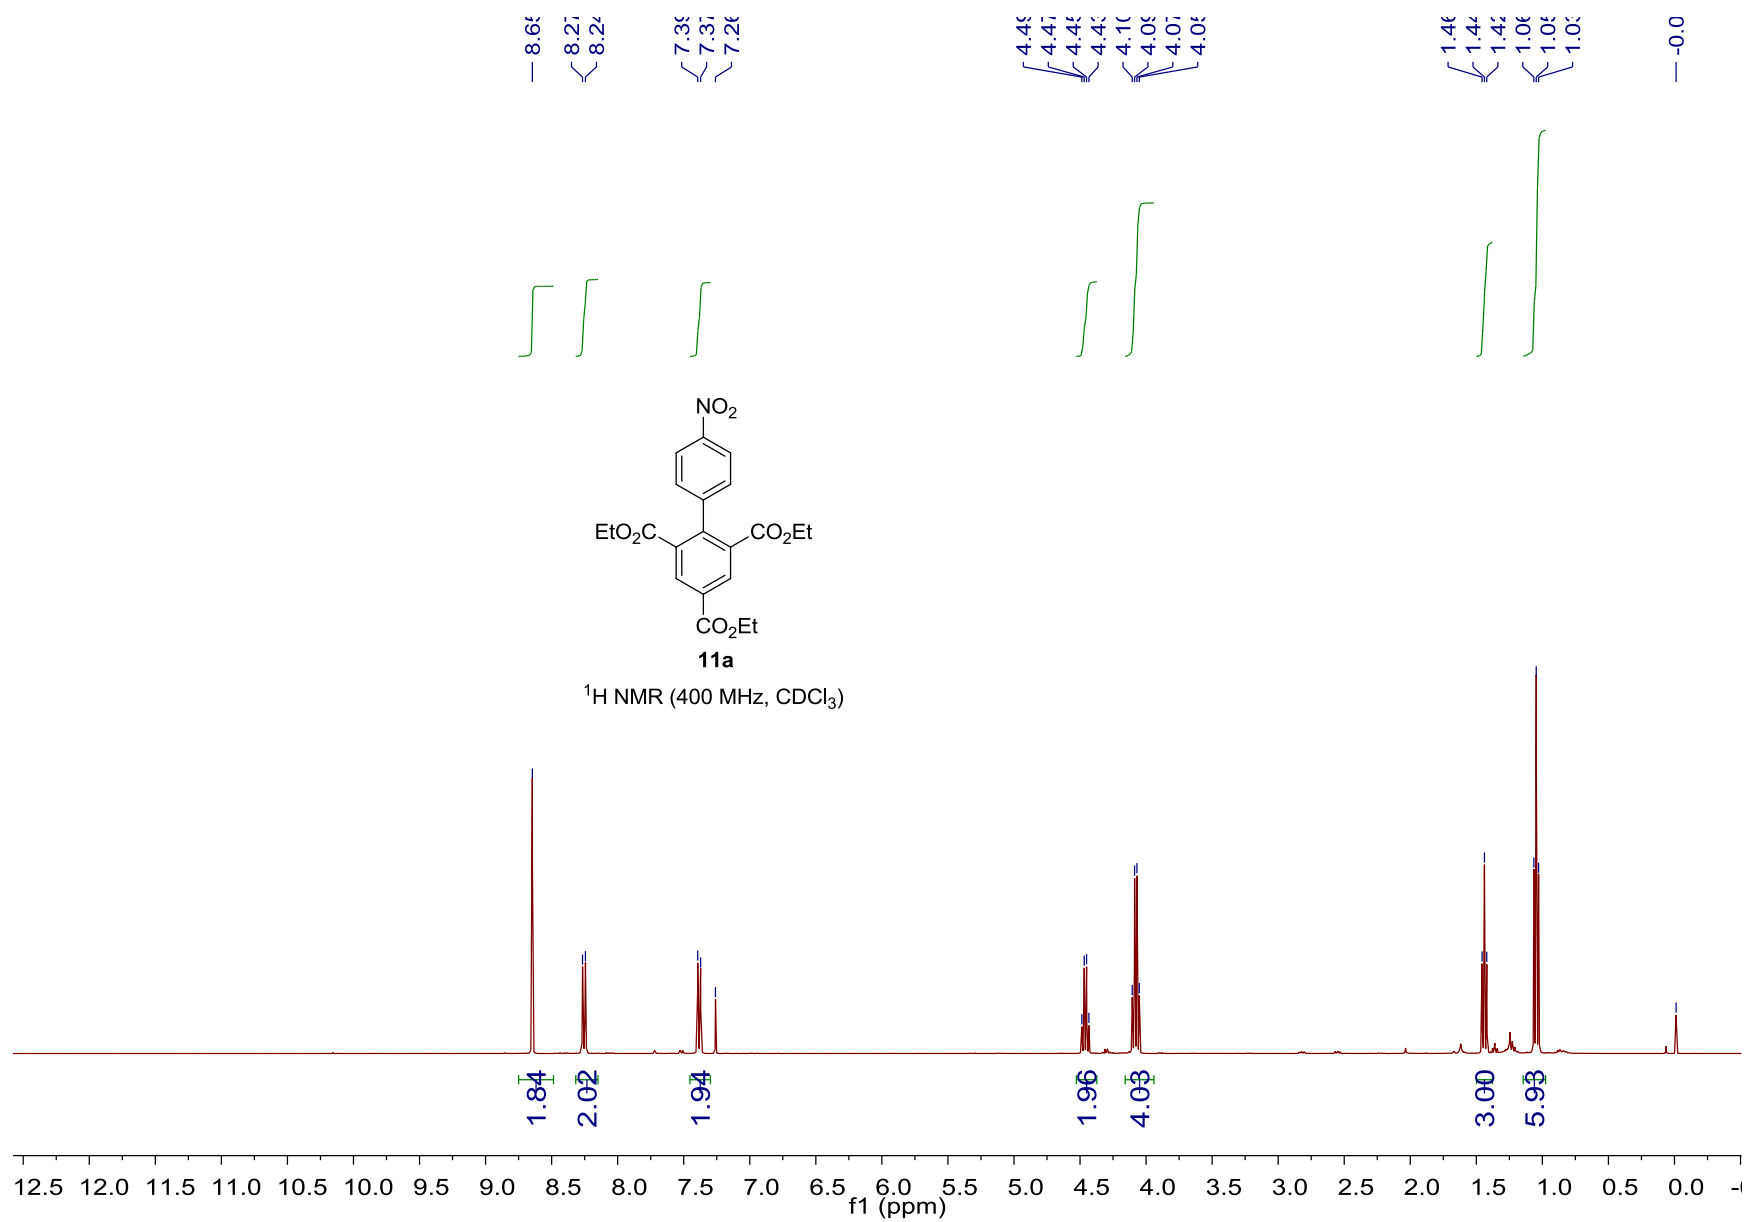

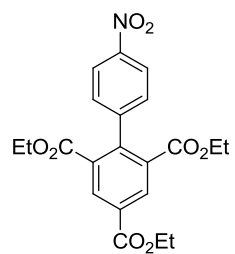

**11a**

<sup>13</sup>C NMR (100 MHz, CDCl<sub>3</sub>)

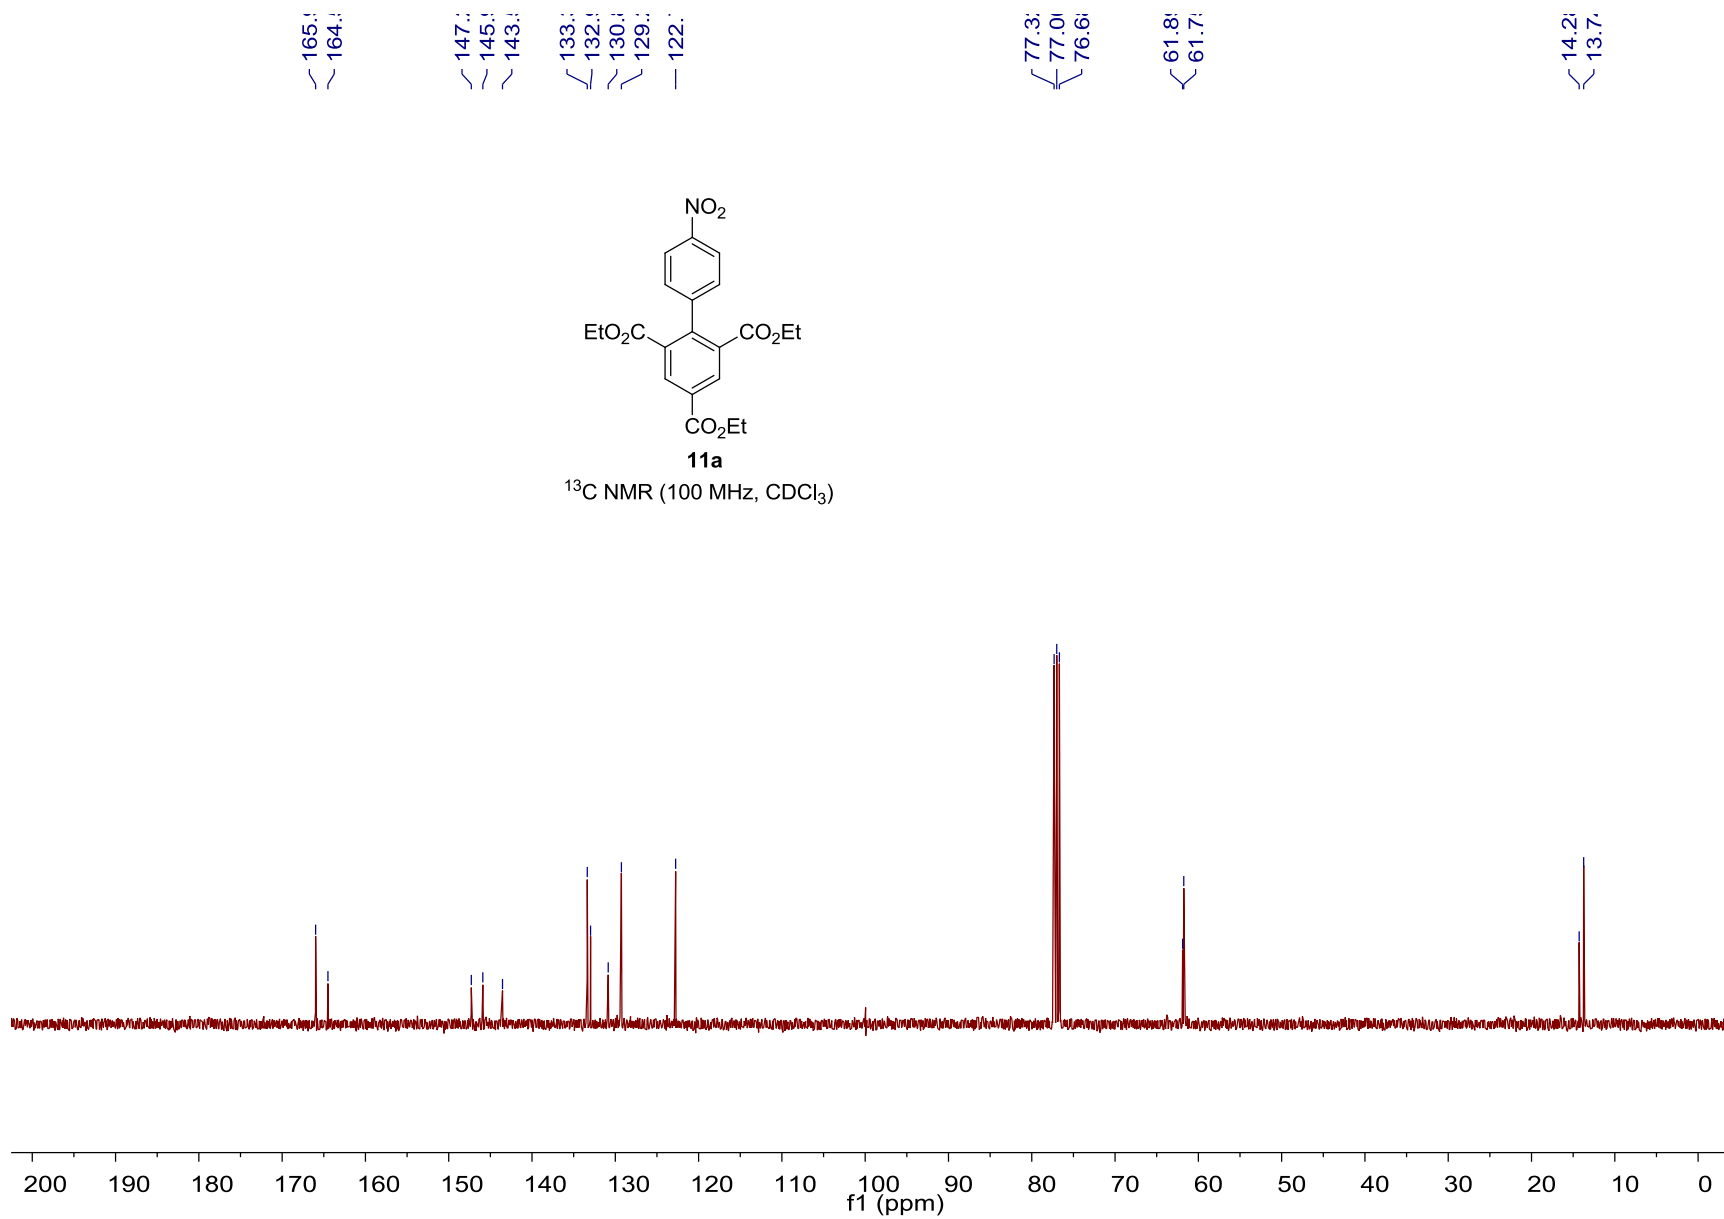

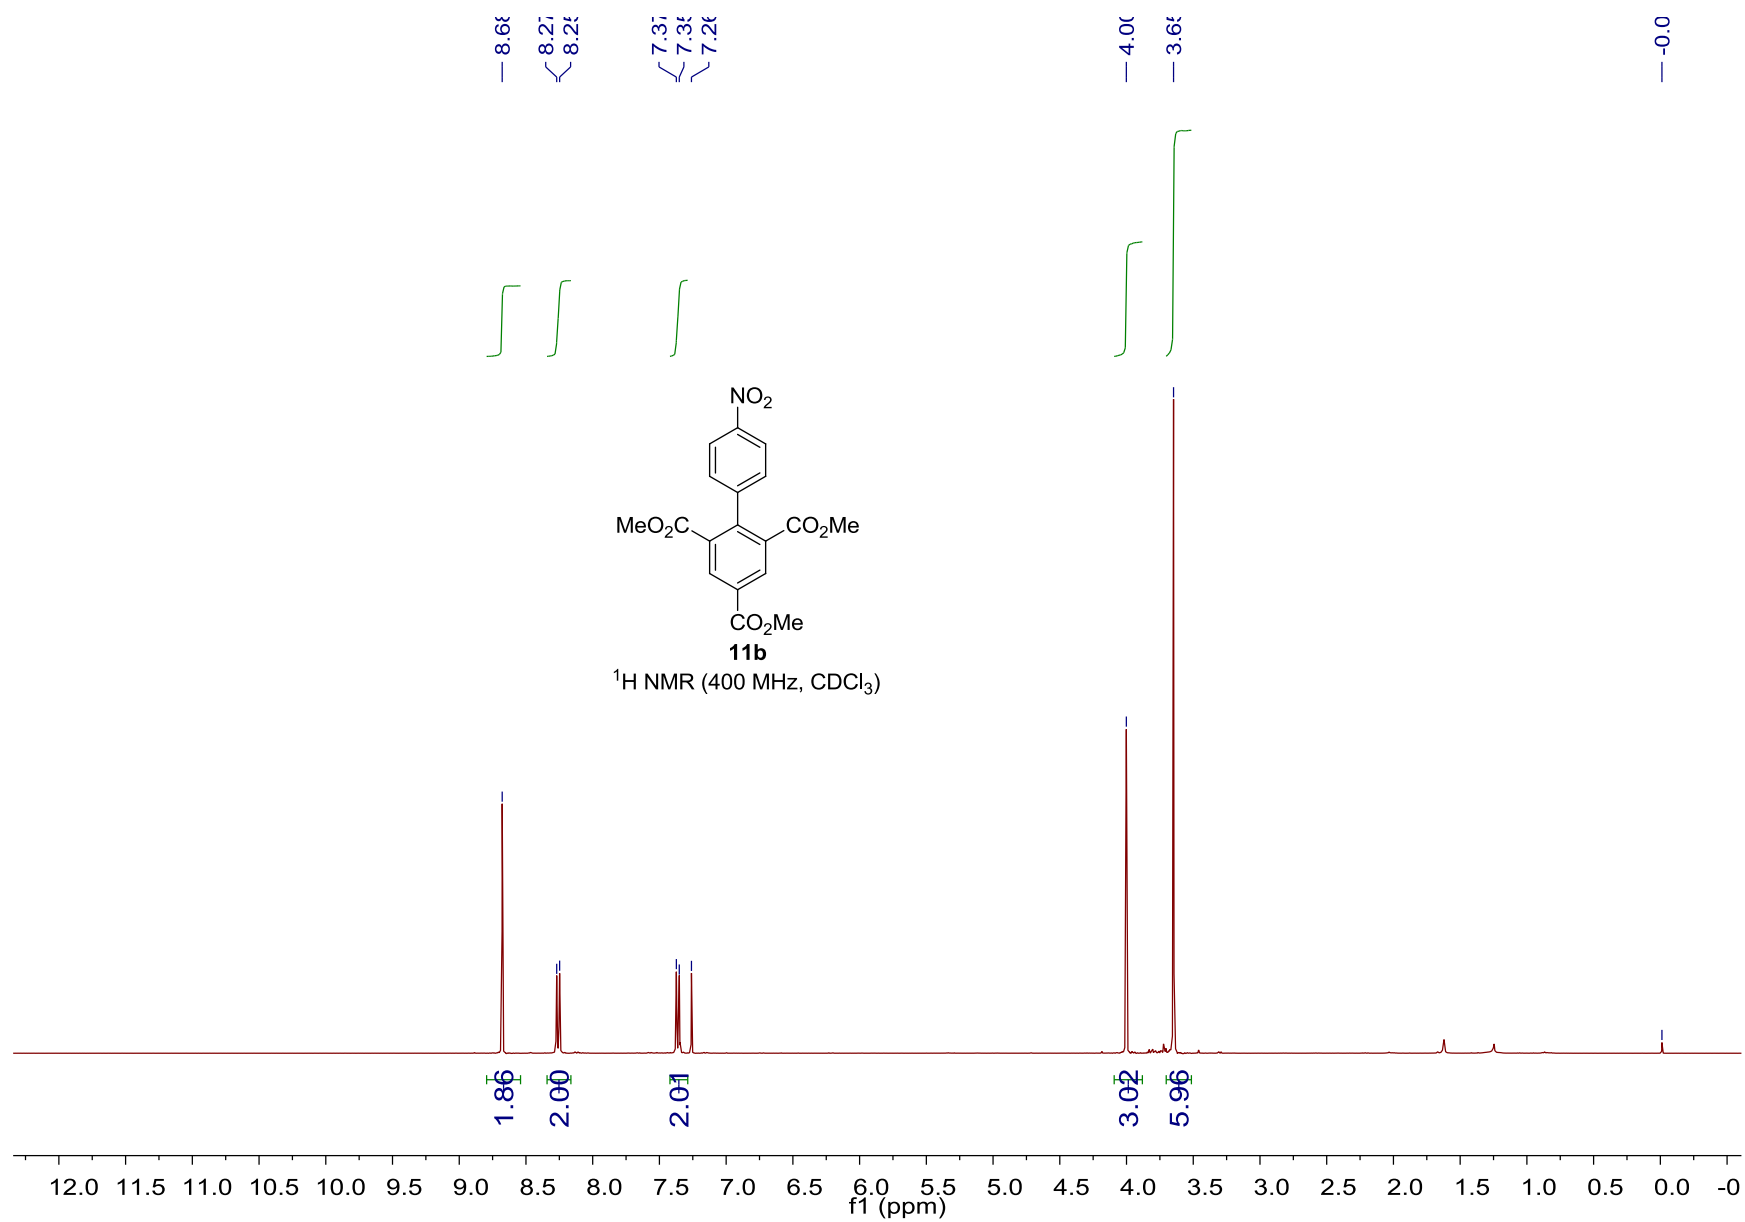

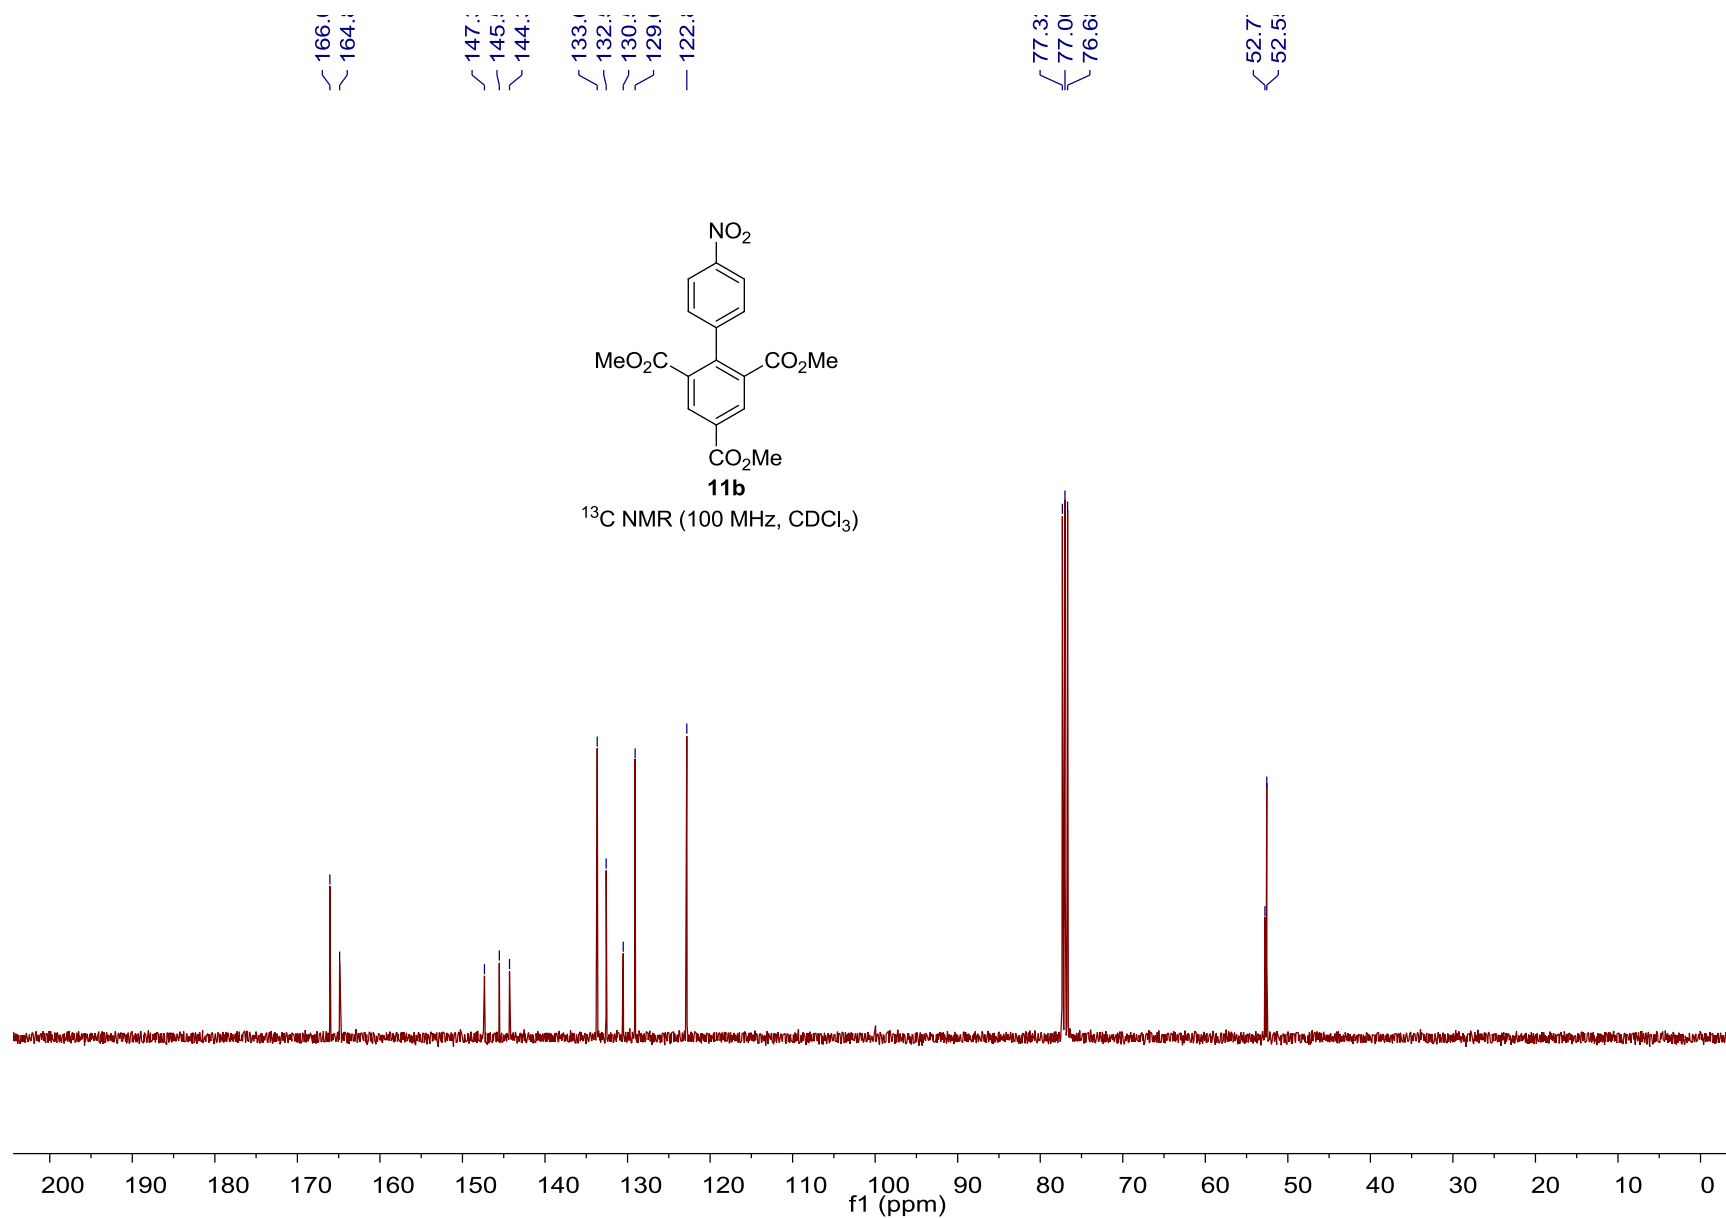

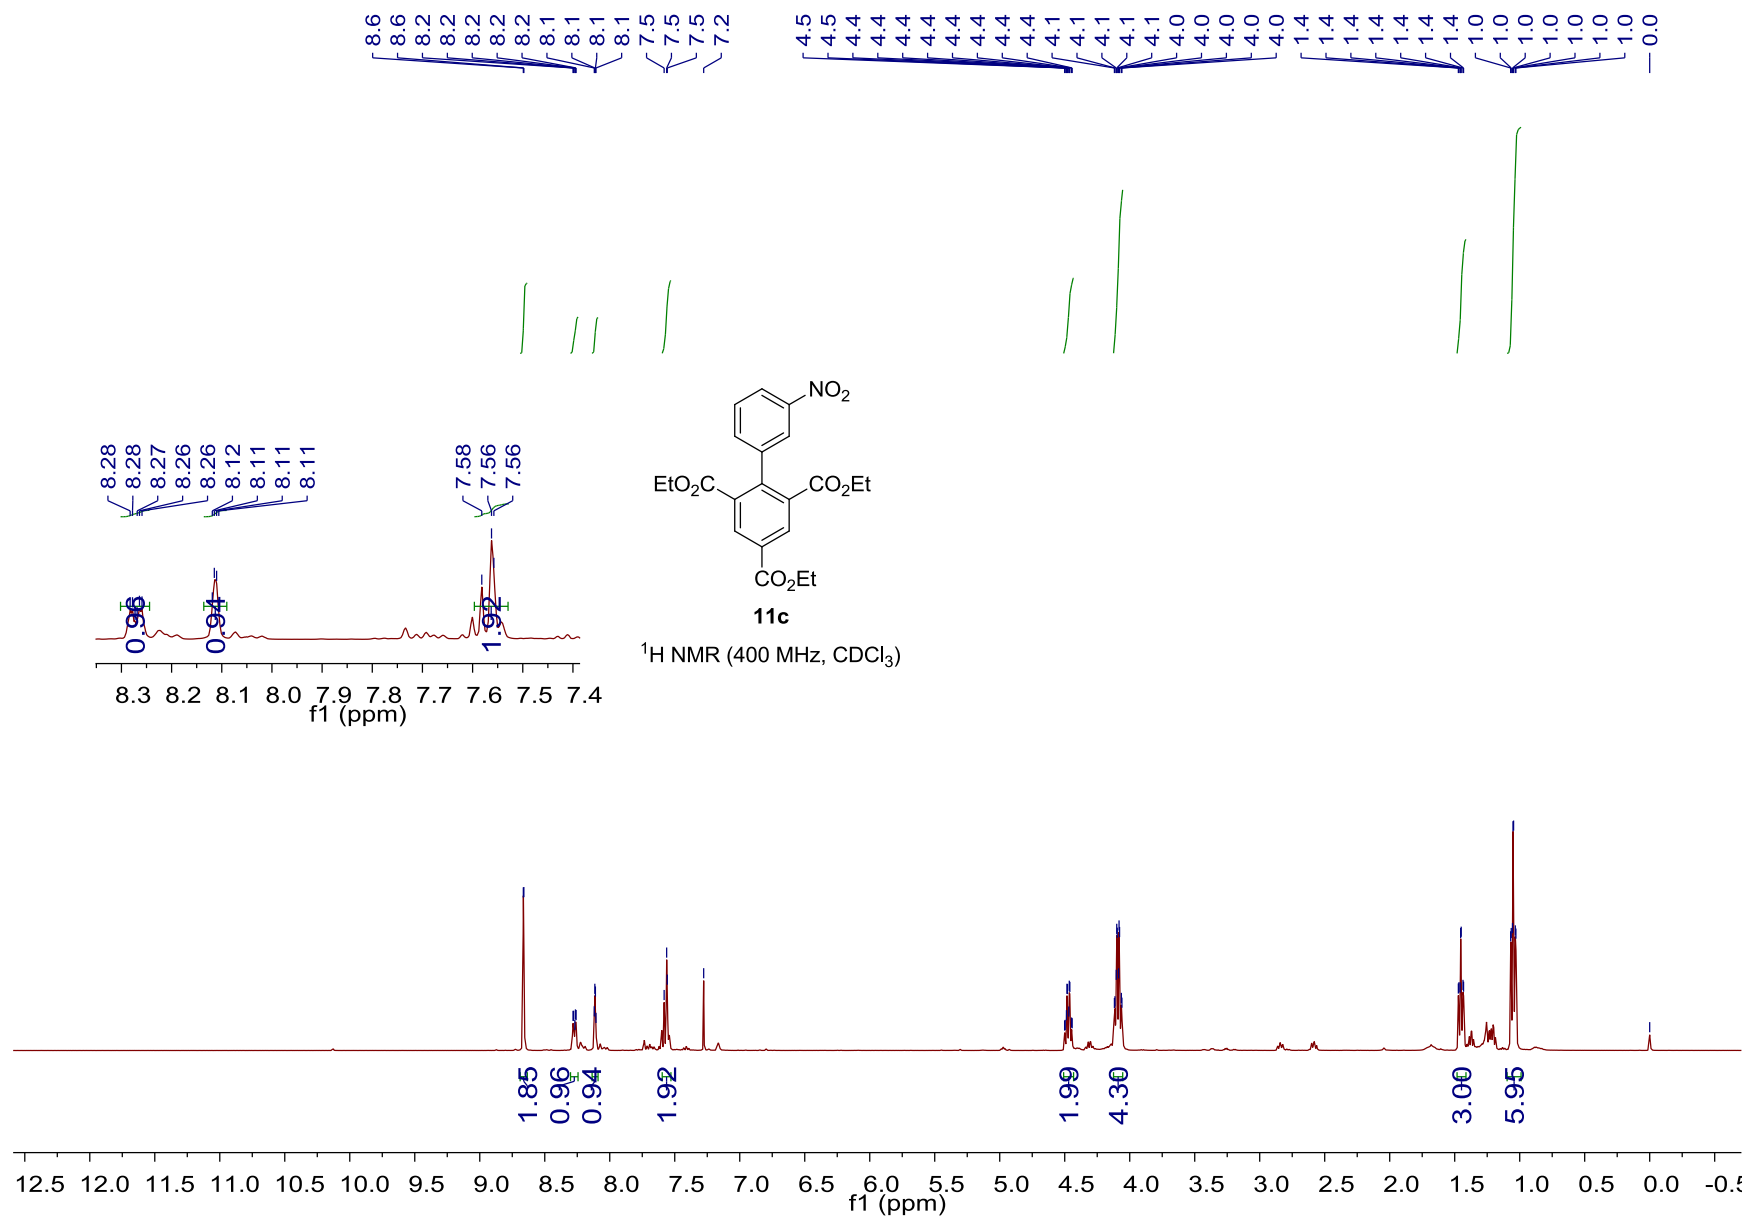

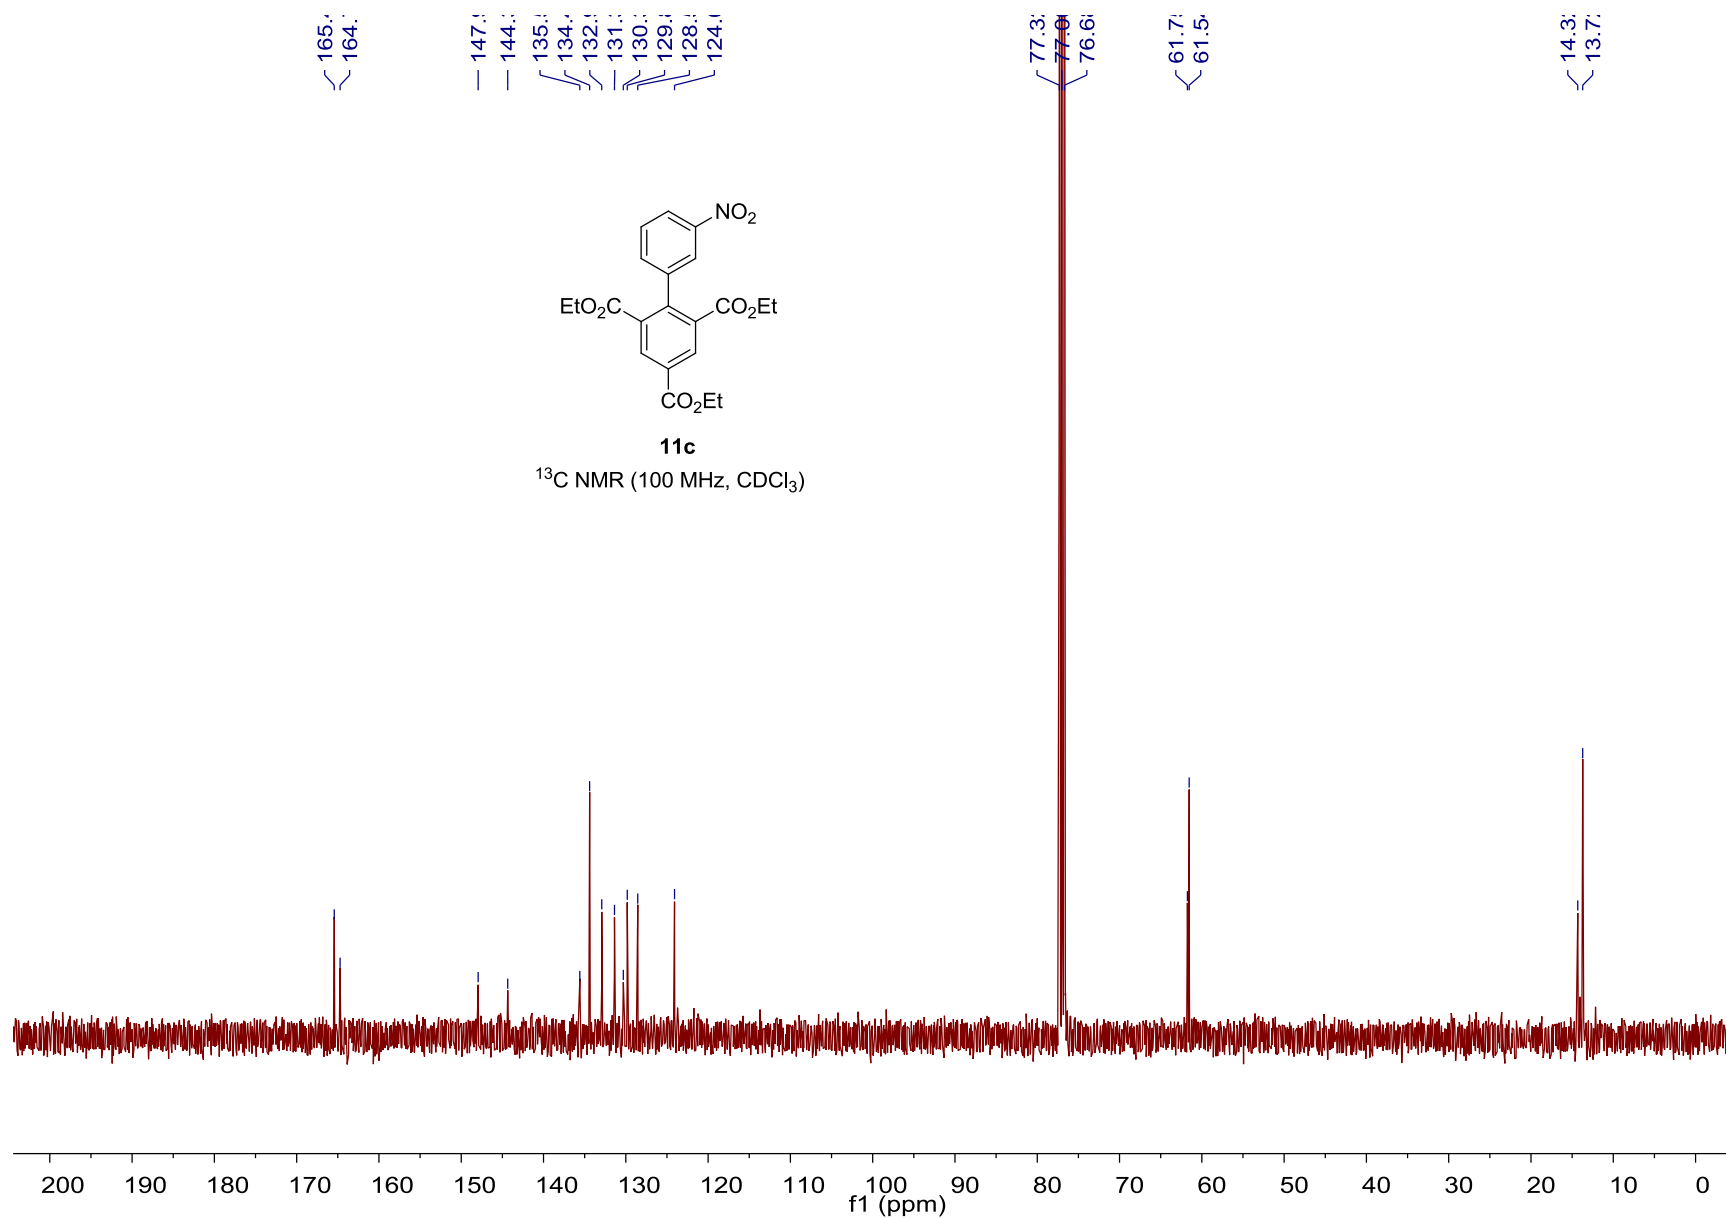

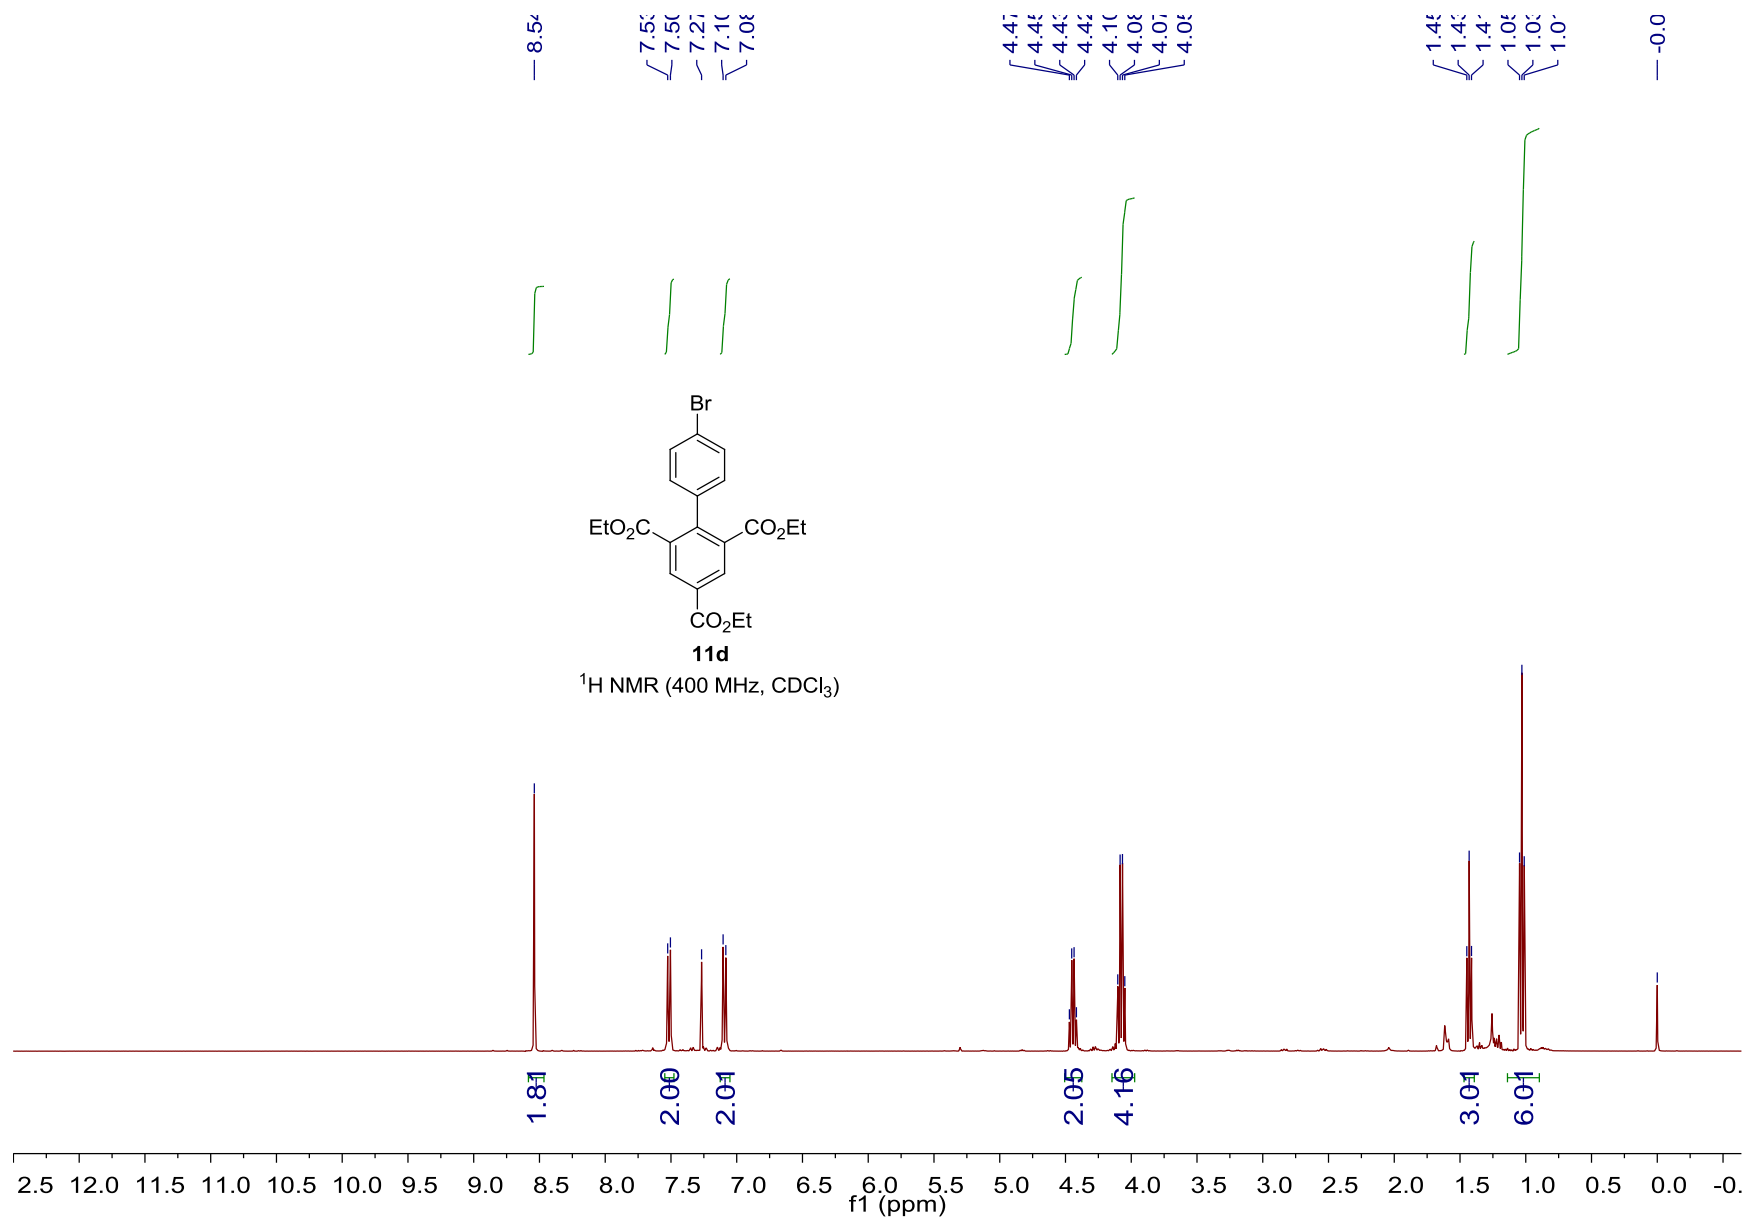

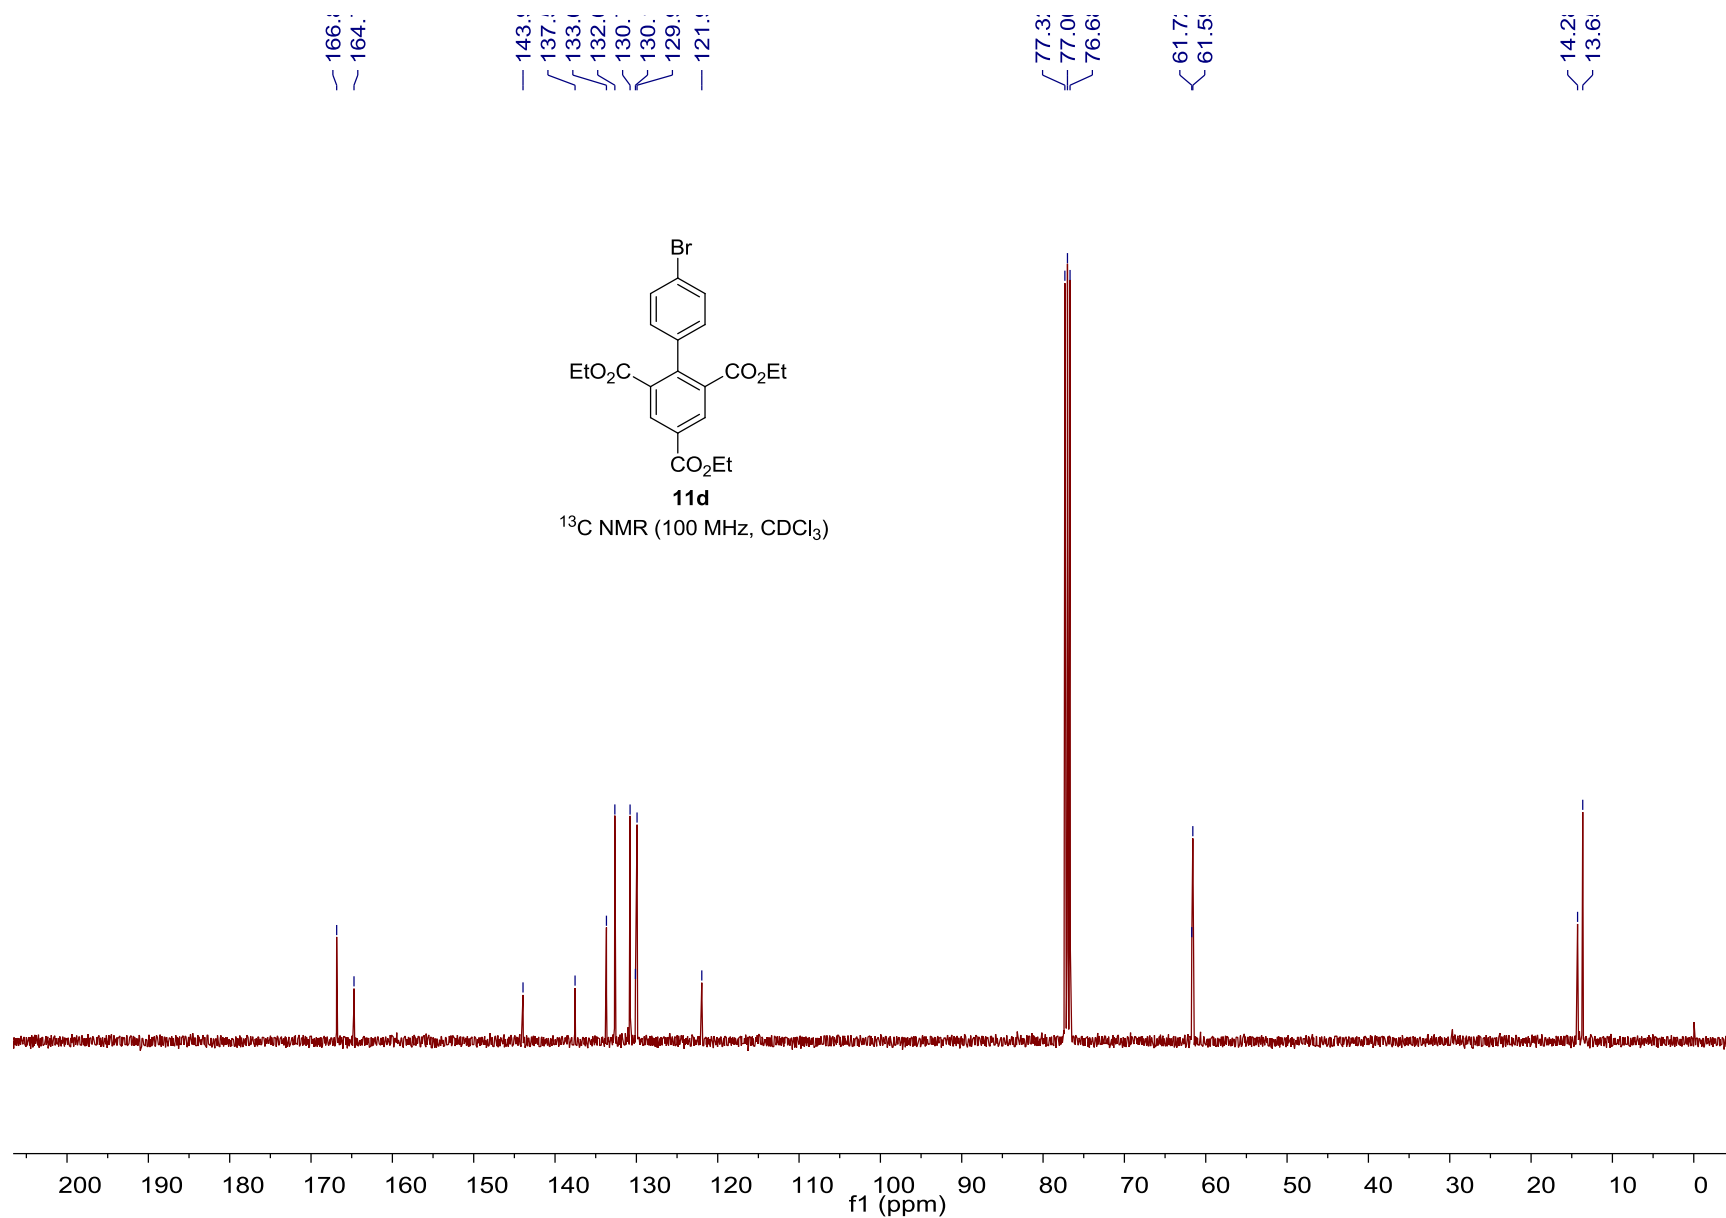

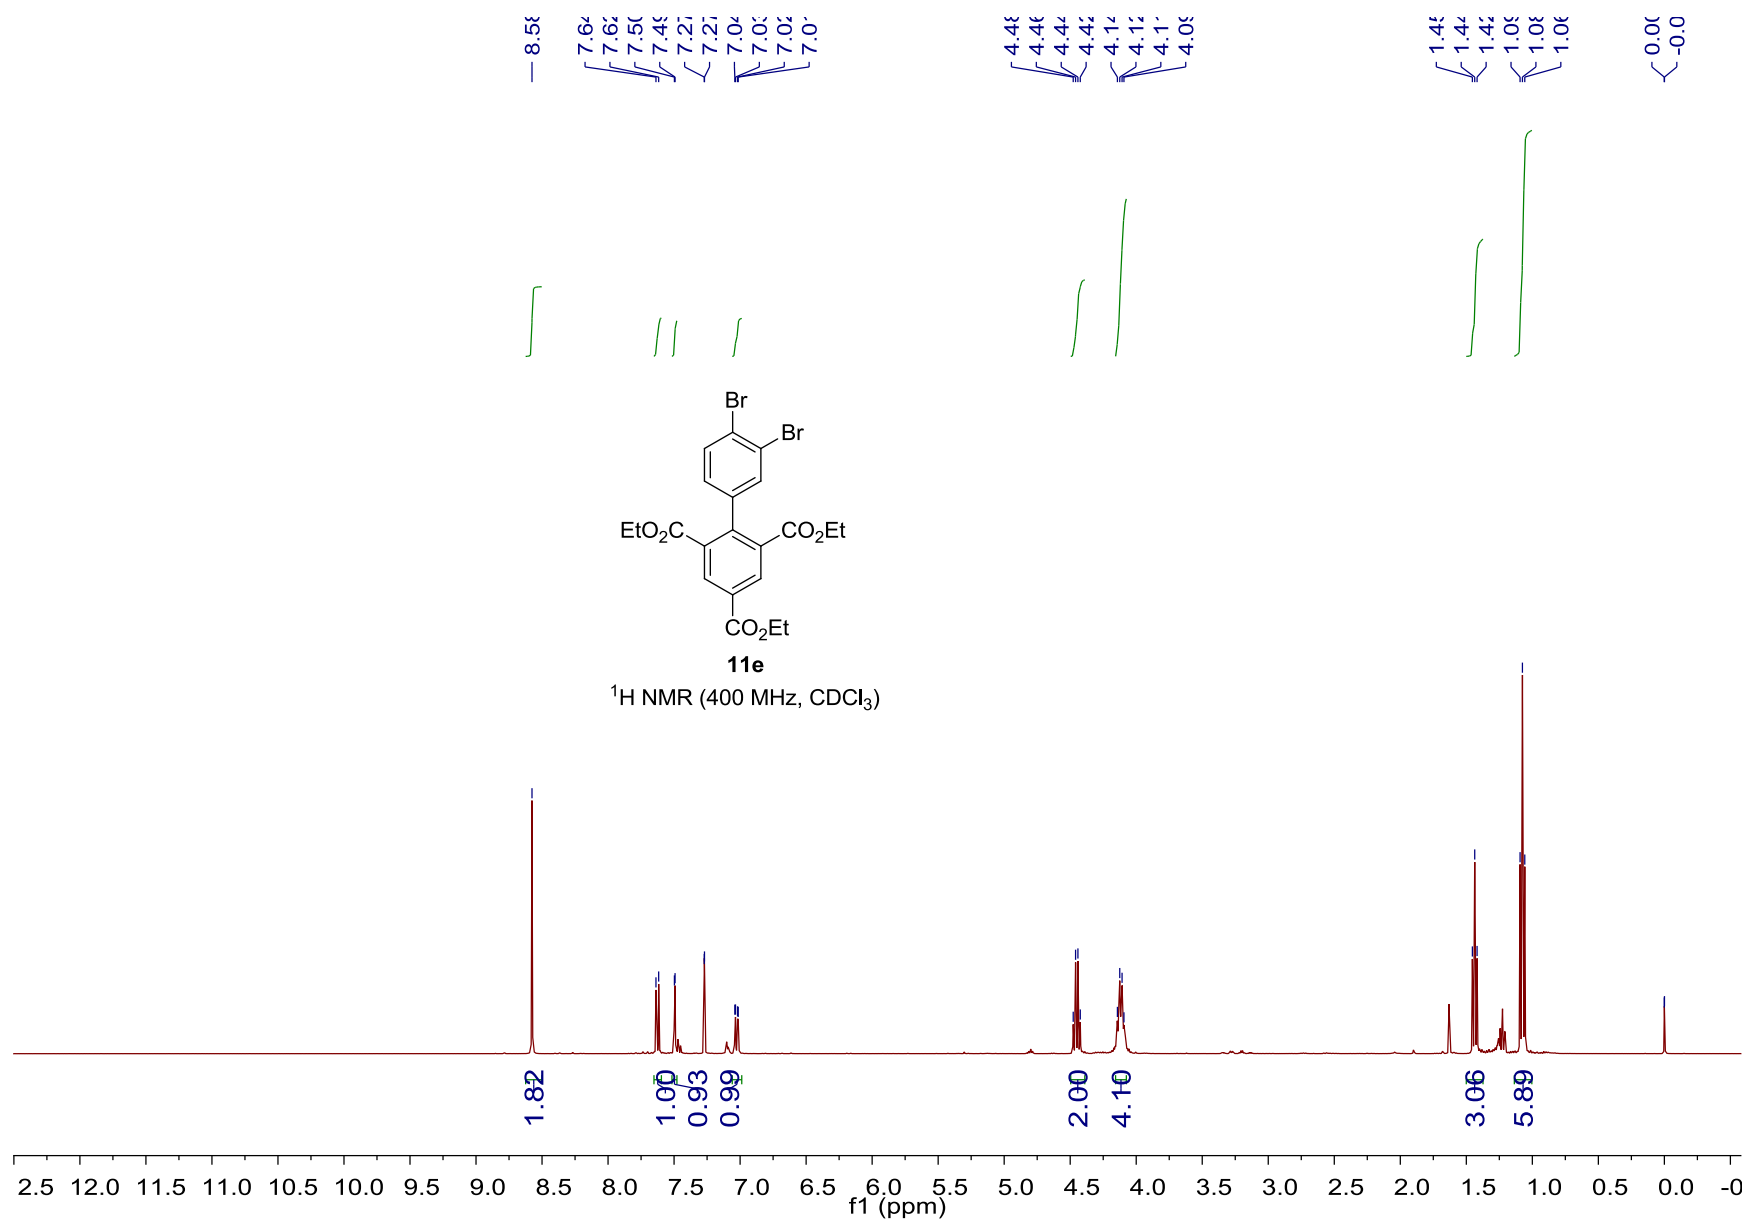

166.1  
164.1

142.1  
139.1  
133.1  
133.1  
132.1  
132.1  
130.1  
128.1  
124.1  
124.1

77.3  
77.0  
76.6

61.7  
61.7

14.2  
13.7

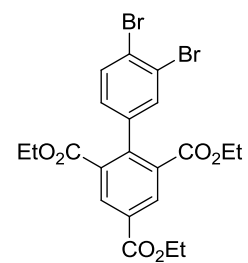

**11e**

$^{13}\text{C}$  NMR (100 MHz,  $\text{CDCl}_3$ )

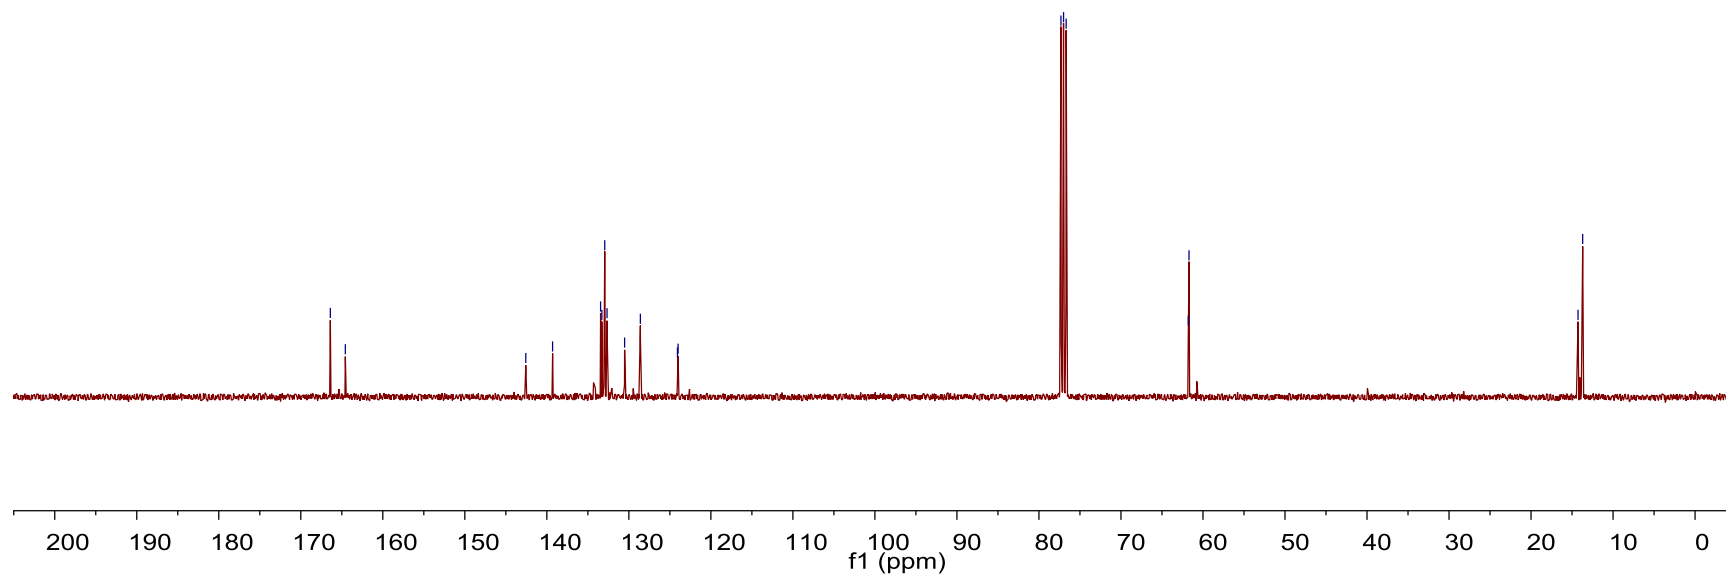

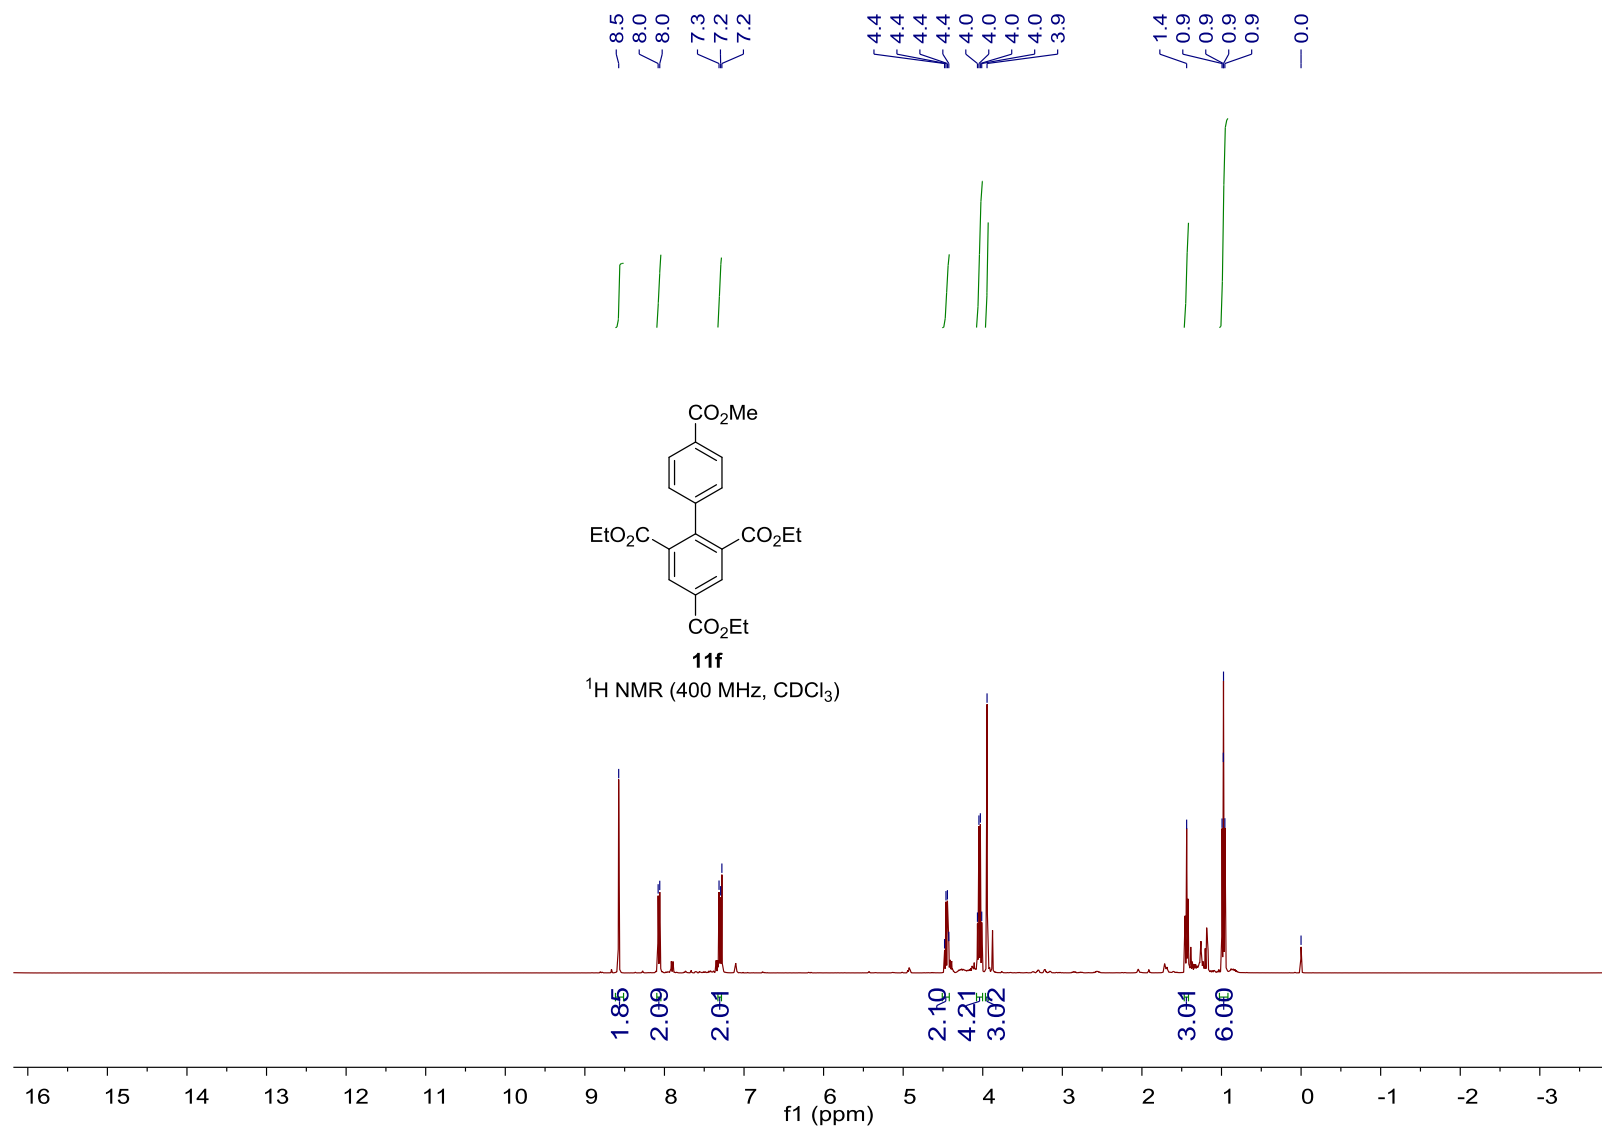

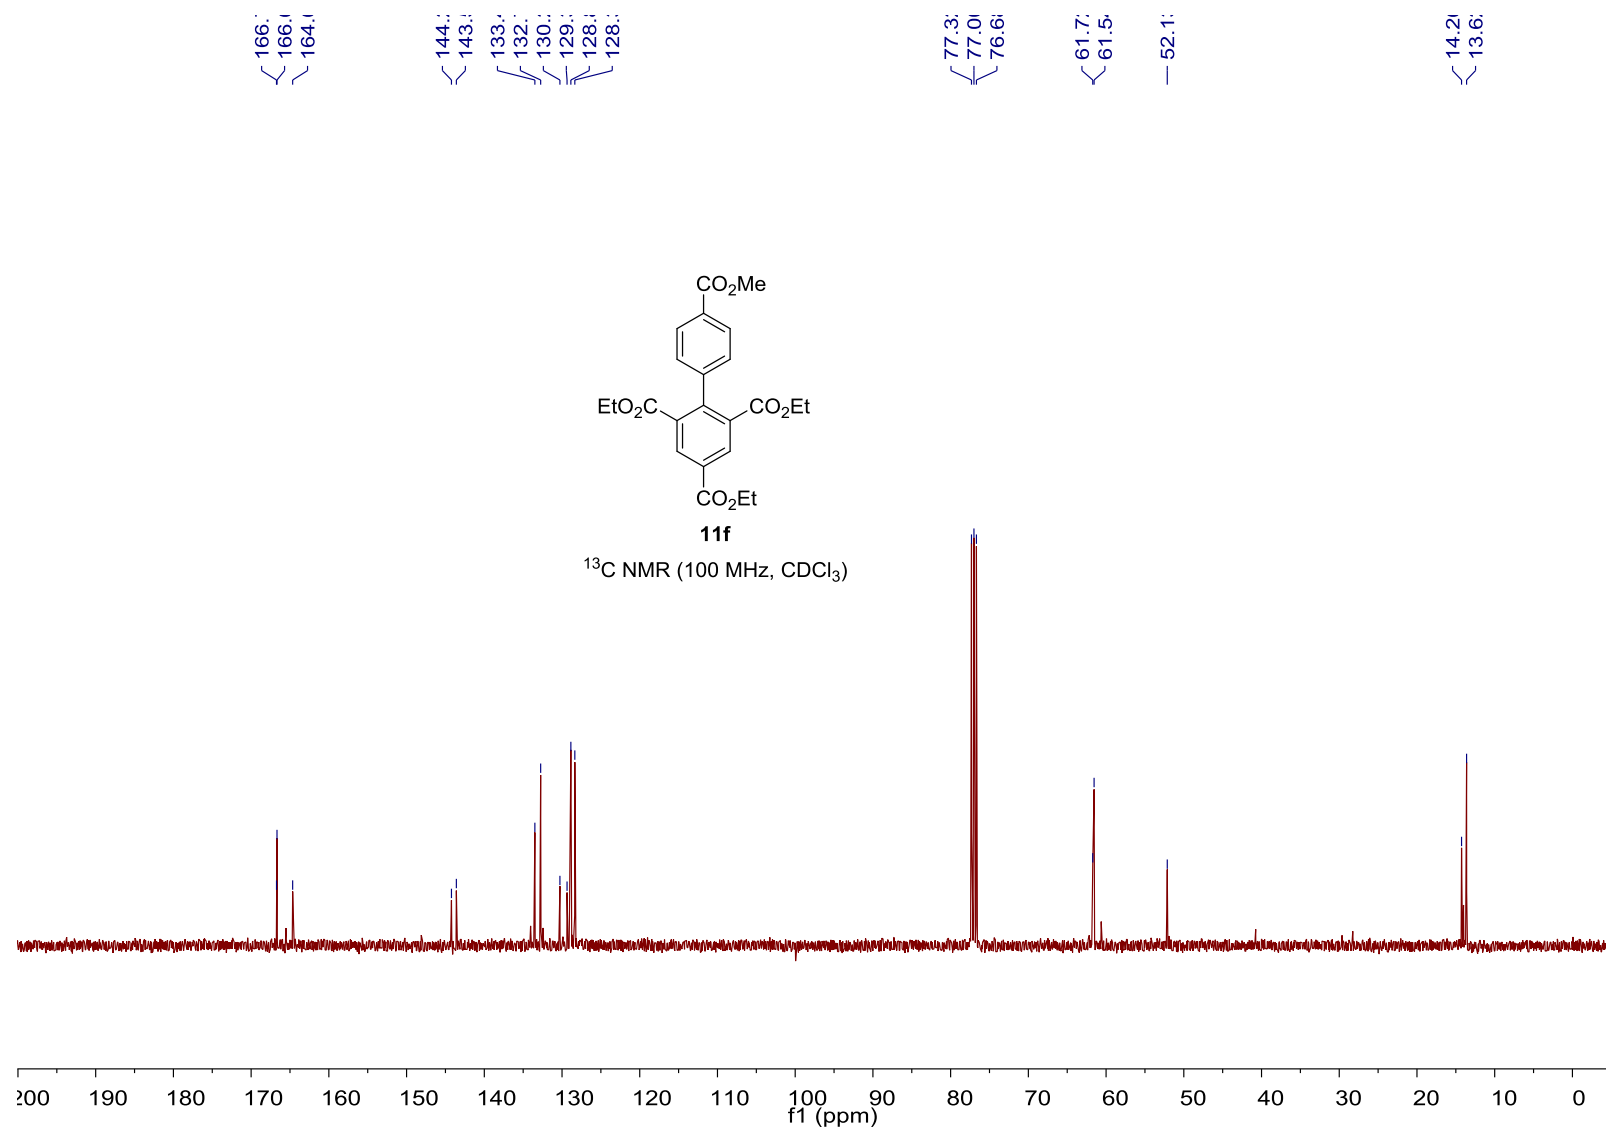

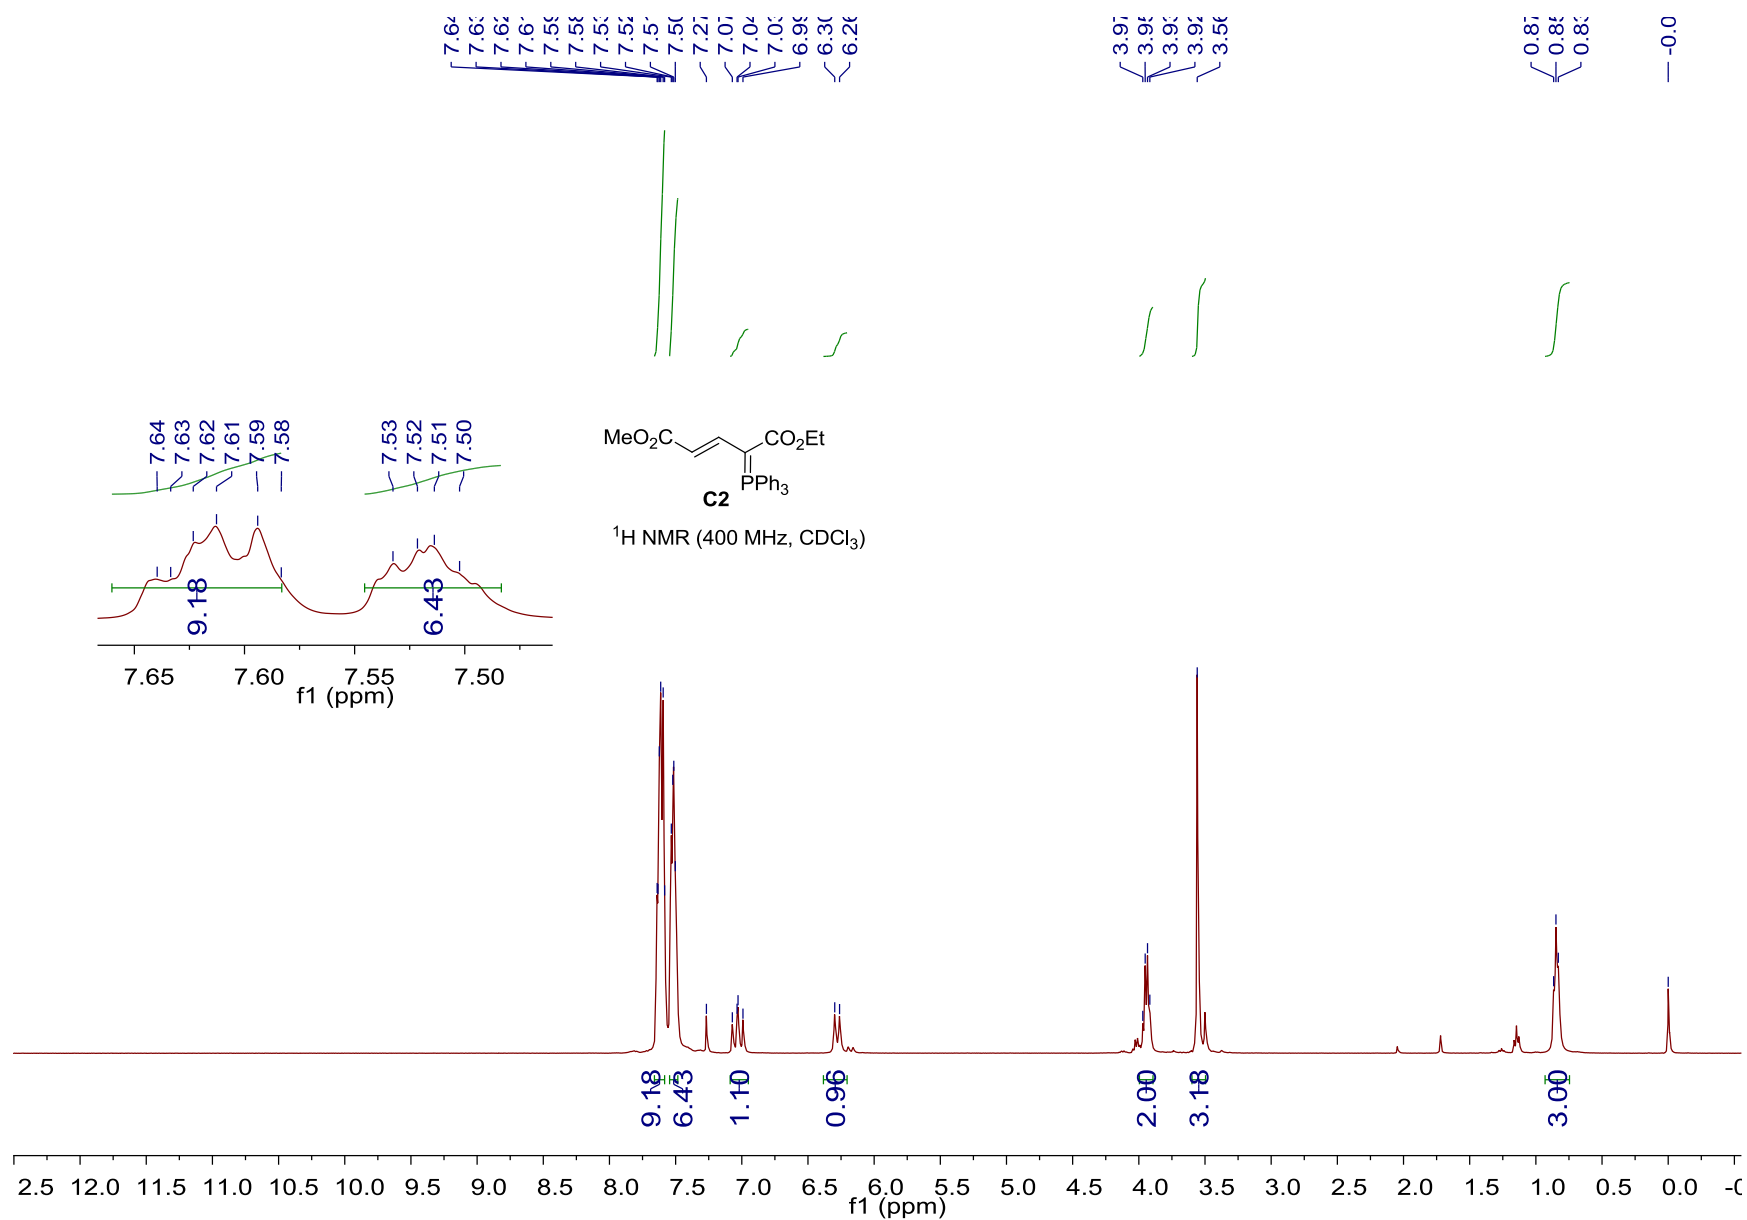

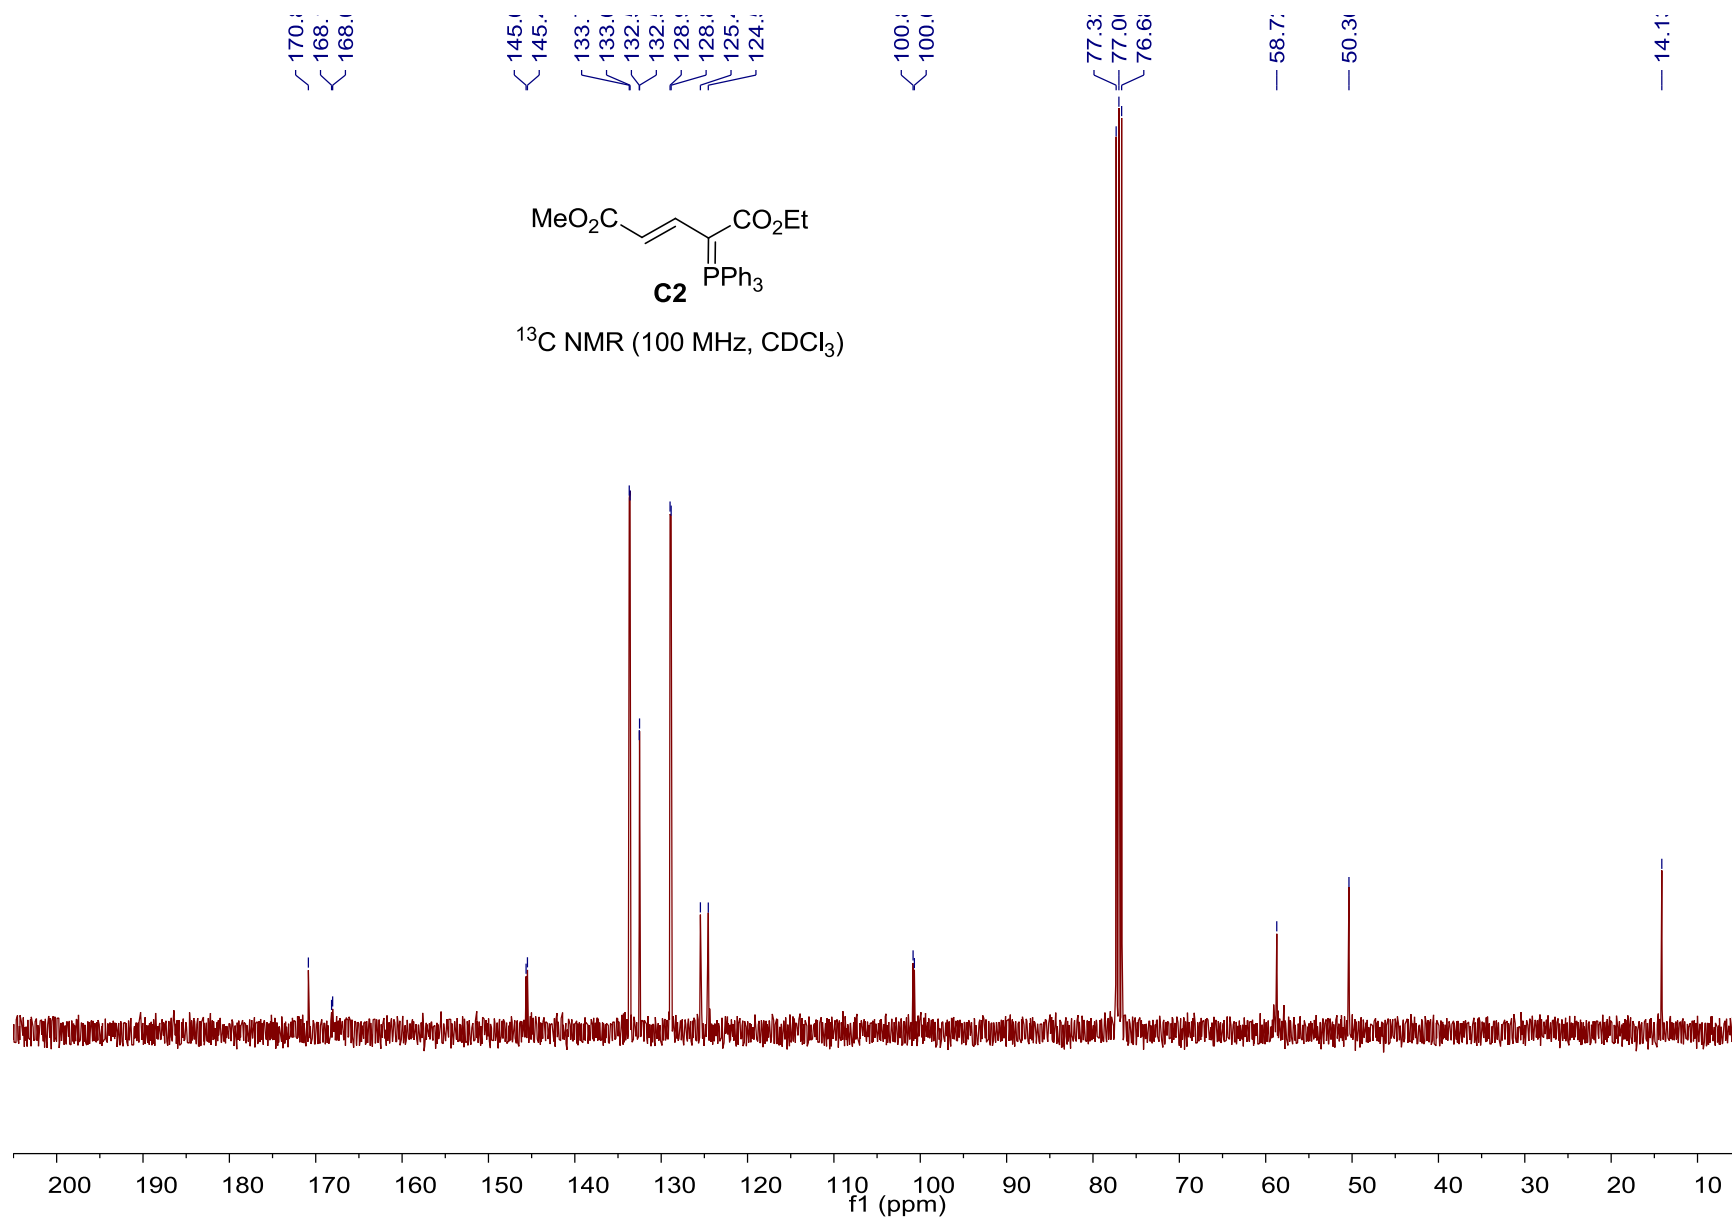

Supplement: d0cc03461d1.pdf [file d0cc03461d1.pdf]
